# Supplementary material
Source: publisher figshare collection journal article supplement (https://frontiersin.figshare.com/ndownloader/files/13111574)
Supplement: Supplementary file 1 [file 13111574]

## Sheet: Subset_ORB
Meas_m.z	Formula	I	Res	Common	Blank0Tap_a	Blank0Tap_b	Blank0Tap_c	H5.3a_a	H5.3a_b	IHSSNOM_1_a	IHSSNOM_1_b	IHSSNOM_1_c	JE.2.5.10_a	JE.2.5.10_b	JE.2.5.10_c	BZWA_a	BZWA_b	N8B_a	N8B_b	N8B_c	Nelha_a	Nelha_b
201.004	C7H6O7	76.2682	302759	1	0	0	0	0	0	0.252643	0.358053	0.297025	0.311426	0.292925	0.201049	0.0739497	0.0566941	0.530904	0.52788	0.526274	0	0
201.019	C11H6O4	4208.76	315205	1	0.123976	0.0983567	0.0995543	0	0	18.7161	19.0664	19.6002	30.384	31.6477	31.8967	21.1753	22.5658	22.6647	22.4661	22.3864	0.021951	0.0260132
201.056	C12H10O3	8959.92	318183	1	3.39969	3.77031	3.54956	0.629726	0.750579	40.5021	42.0638	40.2592	59.4748	62.7826	59.6625	40.7942	43.2221	30.1262	27.9885	27.2701	1.55658	1.47924
201.077	C9H14O5	1717.78	313800	1	0.241654	0.198797	0.217844	0.310698	0.256171	2.39462	2.43294	2.70898	4.91009	4.97239	5.50848	4.08942	4.22692	3.14808	3.41892	3.45333	0.057052	0.0593897
201.092	C13H14O2	5729.42	316823	1	7.41491	7.58921	7.34155	2.754	2.96519	19.2308	19.9251	20.4499	30.5053	30.599	31.4983	22.5125	24.6695	11.8701	11.6622	11.6156	3.74721	3.40595
201.113	C10H18O4	650.279	306732	1	0.0273887	0.0143935	0.0289336	0.12104	0.116145	0	0.0606646	0.0577844	0.168564	0.246599	0.25538	0.881396	0.976008	0.549472	0.485588	0.540902	0	0
201.129	C14H18O	3294.52	314020	1	4.0059	4.22834	3.96527	2.02826	2.19453	4.0682	4.08467	4.43201	6.51532	7.31219	6.98433	5.32155	5.78231	1.7621	1.52889	1.77827	1.77263	1.75461
202.051	C11H9NO3	1880.1	316299	1	0.522744	0.428832	0.453173	0.0585373	0.0516523	5.53044	5.66126	5.57712	27.3347	28.259	26.6851	11.375	12.5167	2.37422	2.58814	2.49705	0.347203	0.317523
202.087	C12H13NO2	1231.25	308773	1	0.977319	1.04674	1.02521	0.577095	0.59663	1.6973	1.93558	1.96676	13.2055	12.4058	12.2871	4.45639	4.82198	0	0.0686176	0.0583736	1.17834	1.04812
202.999	C10H4O5	2247.61	308521	1	0	0	0	0	0	9.58994	10.1798	10.131	11.2362	11.8709	11.3146	13.1386	13.5143	17.1006	17.7768	17.4059	0	0
203.035	C11H8O4	10316.1	316971	1	1.56167	1.67484	1.65348	0.109949	0.139764	44.6936	46.039	48.0421	65.0211	67.2515	67.1497	45.1272	47.871	48.1946	47.0202	46.1294	0.375451	0.328124
203.046	C10H8N2O3	877.404	294345	1	0	0	0	0.00508789	0.00767625	0.363408	0.426215	0.446788	12.1471	13.1879	12.1916	2.63226	2.39067	0.100936	0.165999	0.172624	0.0812212	0.0691877
203.071	C12H12O3	9023.29	316670	1	7.18806	7.77606	7.22573	2.04639	2.26692	41.3154	40.8004	42.0214	55.695	55.8006	55.0236	43.8831	47.1309	30.6471	28.347	27.1227	3.57002	3.49469
203.075	C9H16O3S	13.766	291592	1	0	0	0	0.00895468	0.00840499	0	0	0	0	0	0	0	0	0	0	0	0	0
203.108	C13H16O2	10194.3	315913	1	10.0107	10.8037	10.062	5.98014	6.79059	19.9109	19.8895	19.7474	31.2702	32.8084	31.5856	24.4806	26.9117	16.933	15.2702	15.0934	4.77899	4.70265
203.119	C12H16N2O	18.5198	304789	1	0	0	0	0.00848318	0.0123363	0	0	0	0	0	0	0	0	0	0	0	0	0
203.144	C14H20O	2831.54	312440	1	2.89048	3.09394	2.7889	1.67766	1.88613	2.34482	2.22925	2.11026	3.49081	3.63051	3.34985	3.41395	4.14043	0.87131	0.99327	1.00744	0.830888	0.667588
204.03	C10H7NO4	1589.52	312245	1	0.0956435	0.0918972	0.124891	0.00513877	0.0122708	3.66161	4.07202	4.16583	23.15	22.7284	23.2876	8.00333	8.15877	2.00869	2.07879	2.04607	0.0240384	0.0389078
204.139	C13H19NO	94.4363	310568	1	0.0194349	0.0187761	0.022913	0.0614299	0.0551396	0	0	0	0	0	0	0	0	0	0	0	0.023216	0.0306549
204.997	C10H6O3S	59.865	281118	1	0	0	0	0	0	0.0656688	0	0.0788394	0.369043	0.690222	0.346181	0.114175	0.0762506	0	0	0	0	0
205.014	C10H6O5	7003.57	312926	1	0.208596	0.224517	0.206739	0	0	31.1594	32.8794	31.5933	40.8266	43.5105	41.2177	25.6286	27.4614	40.4059	39.9741	39.7556	0.0153577	0.0137688
205.051	C11H10O4	10910.3	316268	1	3.78451	4.17312	3.84484	0.833407	0.962143	49.8499	50.1764	50.8094	61.7983	63.8231	62.6075	50.7182	55.5069	57.553	52.1581	52.1588	1.72088	1.76652
205.062	C10H10N2O3	770.426	297115	1	0	0	0	0.0442435	0.0460518	0.266276	0.301802	0.405404	10.2045	11.315	11.2873	2.43288	2.58607	0.143903	0	0.193654	0.163715	0.163115
205.087	C12H14O3	9302.73	315171	1	10.5484	10.942	10.6227	5.69656	6.19669	35.8566	36.1722	38.7463	51.6558	50.7062	51.8918	43.8132	47.6688	30.9604	30.9492	29.9473	5.39723	5.05141
205.123	C13H18O2	11194.7	312428	1	7.75604	8.02764	7.66271	7.16561	7.45696	13.7535	14.2942	14.1837	23.7529	24.5465	24.2101	18.2789	19.865	13.9495	13.9723	13.5953	3.27617	3.11589
205.16	C14H22O	8030.76	315492	1	2.38829	2.3054	2.1033	1.59963	2.99293	7.33529	5.2732	4.59935	22.7218	16.2738	12.521	10.2256	12.8474	10.1456	7.43117	8.52819	0.654823	0.306494
206.01	C9H5NO5	596.799	306614	1	0	0	0	0	0	0.866105	0.847761	0.920293	7.92193	8.92472	8.666	1.84258	1.94965	0.455424	0.43086	0.377972	0	0
206.028	C10H9NO2S	30.8587	280872	1	0	0	0	0	0	0	0	0	0.310149	0.345907	0.452103	0.0719625	0.0784381	0	0	0	0	0
206.046	C10H9NO4	1526.74	313235	1	0.302268	0.307868	0.332177	0.0345733	0.0432161	4.46191	4.93154	4.8817	22.5638	22.9479	22.234	9.92865	10.7033	2.45294	2.51283	2.08313	0.238159	0.275179
206.061	C14H9NO	116.969	305049	1	0	0	0	0	0	0.0781336	0.146033	0.176419	1.35401	1.75812	1.41752	0.295331	0.118397	0	0	0	0	0
206.082	C11H13NO3	1460.13	312773	1	1.22563	1.33155	1.18933	0.894121	0.972615	3.4934	3.43622	3.81029	16.2775	16.7562	15.7539	7.86529	8.78975	0.676579	0.617279	0.560806	1.48114	1.50036
206.119	C12H17NO2	1297.53	305141	1	0.336568	0.393188	0.290361	0.837164	0.864304	0.0919675	0.0982479	0.0414849	0.545651	1.05162	0.728486	1.68798	1.45757	0	0	0	0.323501	0.323787
206.155	C13H21NO	362.084	302911	1	0	0	0	0	0	0	0	0	0	0	0	2.35044	2.68379	0	0	0	0	0
206.994	C9H4O6	2454.35	308362	1	0	0	0	0	0	11.1783	11.2125	11.4299	11.7368	12.6744	11.6556	9.68677	9.41593	18.9361	18.0919	18.0845	0	0
207.005	C8H4N2O5	46.23	286281	1	0	0	0	0	0	0	0	0	0.602742	0.694865	0.471775	0	0	0	0	0	0	0
207.012	C10H8O3S	1406.37	290548	1	0.223118	0.20974	0.207851	0.0764514	0.0880942	0.260147	0.342727	0.240858	1.89316	2.28033	1.97793	1.60326	1.47049	0.755636	0.75536	0.600625	0	0
207.03	C10H8O5	7654.19	313175	1	1.00966	1.03555	0.935684	0.0819961	0.0820483	33.3022	34.3451	35.6455	42.3984	44.4845	44.7064	33.4261	34.6434	58.1195	58.4198	58.0925	0.268832	0.23303
207.041	C9H8N2O4	437.122	294952	1	0.0180229	0.0215794	0.0205044	0	0	0.253969	0.2261	0.156066	6.39826	6.57021	6.27361	1.09584	1.21815	0.0864919	0.135687	0.170618	0.0277972	0.0258188
207.045	C14H8O2	740.895	306486	1	0.0152983	0.0110113	0.010968	0	0	3.17277	3.2319	3.45034	6.62247	7.01098	6.24705	4.11122	3.97565	2.47059	2.56641	2.57114	0	0
207.066	C11H12O4	9271.07	314565	1	5.98636	6.60259	6.042	2.32692	2.59396	42.1387	41.7113	43.1753	51.1882	53.0444	51.0981	50.5495	54.4472	52.7109	49.256	49.0939	3.1731	3.01868
207.078	C10H12N2O3	458.184	301927	1	0.151642	0.163692	0.139188	0.100315	0.120752	0.163091	0.190517	0.172138	6.0649	6.57083	6.48374	1.37806	1.70952	0.0645002	0.106088	0.117632	0.194978	0.211696
207.082	C15H12O	979.138	309423	1	0.927152	0.901042	0.864082	0.114936	0.092318	4.22427	4.38819	4.55984	7.81214	7.60137	7.44059	4.43143	4.51453	1.55243	1.53875	1.2784	0.388768	0.4053
207.103	C12H16O3	14543.3	312829	1	8.75585	9.17169	9.039	9.3558	9.6875	25.6959	27.4662	25.6266	35.1225	36.825	36.3858	32.0696	34.4398	25.4433	24.7668	24.7997	4.24761	4.21143
207.139	C13H20O2	11530.9	311976	1	3.17149	3.04973	3.0289	7.50071	7.30161	5.46888	5.53636	5.97601	11.1791	11.022	10.7183	7.55972	8.26502	6.75147	6.69751	7.76241	0.846194	0.762772
208.025	C9H7NO5	864.126	305699	1	0	0.0131904	0.0305997	0	0	1.22507	1.45904	1.67081	9.5374	10.1404	10.1523	3.43535	3.41728	0.660055	0.867916	0.834583	0.0172761	0.010515
208.04	C13H7NO2	187.775	300401	1	0	0	0	0	0	0.07651	0.139027	0.11496	2.23685	2.82237	2.68565	0.431089	0.333701	0	0	0	0	0
208.062	C10H11NO4	1350.71	311946	1	0.514486	0.531702	0.506543	0.213865	0.22531	3.57088	3.52959	3.73869	16.4939	17.4015	17.5193	9.13292	10.0116	2.17879	1.86459	1.83751	0.778314	0.799665
208.077	C14H11NO	333.993	300082	1	0.0431705	0.076018	0.0712832	0.0173088	0.0151422	0.250318	0.198023	0.281388	4.03953	3.52622	4.06982	0.453459	0.583717	0	0	0	0.0177897	0.0110645
208.098	C11H15NO3	2085.24	307495	1	0.737749	0.608203	0.636487	1.30134	1.38901	0.701748	0.68185	0.519921	3.20791	4.73267	3.96421	2.69933	2.49339	0.165375	0.192063	0	0.707349	0.681782
208.134	C12H19NO2	158.617	301423	1	0	0	0	0.103179	0.0962197	0	0	0	0	0	0	0	0	0	0	0	0	0
209.009	C9H6O6	3074.78	309908	1	0.0239449	0.0232899	0.0292654	0	0	12.0348	11.9822	12.6677	14.8736	15.7249	15.7004	8.99499	9.65826	25.8306	23.9102	23.9675	0	0
209.013	C6H10O6S	141.868	295588	1	0	0	0	0	0	0	0	0	2.16504	1.72079	1.78403	0	0	0	0	0	0	0
209.02	C8H6N2O5	43.3002	293441	1	0	0	0	0	0	0	0	0	0.461222	0.533425	0.634381	0.0592211	0.0638859	0	0	0	0	0
209.046	C10H10O5	8695.99	312664	1	2.1996	2.40839	2.26329	0.514846	0.577234	32.7414	33.5041	32.6353	40.7558	44.4739	42.8887	46.3713	49.7945	71.8523	68.6999	67.8279	1.46226	1.54921
209.057	C9H10N2O4	334.945	286432	1	0.0198613	0.0315665	0.0391587	0.0116571	0.0124727	0.190535	0.23654	0.185228	4.6649	4.10526	4.10983	0.945674	1.10436	0.117505	0.165073	0.120391	0.0248719	0.0668868
209.061	C14H10O2	3271	309422	1	2.00641	2.04689	2.01864	0.314879	0.318037	15.0862	15.3562	15.1773	28.8317	29.6279	30.6983	16.1198	16.8002	11.2819	11.0766	11.0229	0.789428	0.875442
209.072	C13H10N2O	236.307	289854	1	0	0	0	0	0	0	0.0486675	0.064065	2.90027	3.33819	2.9086	0.254475	0.283077	0	0	0	0	0
209.082	C11H14O4	9286.39	311355	1	6.30424	7.07498	6.49412	5.77097	6.1858	31.1576	31.5495	31.0751	35.995	37.9149	35.6893	36.0151	38.4342	35.9099	35.5736	34.9833	3.19123	3.19808
209.093	C10H14N2O3	180.449	297869	1	0.0493883	0.0598707	0.0458512	0.0651517	0.072744	0	0	0	1.42001	1.24587	1.67574	0.327774	0.36826	0	0	0	0.0301203	0.059571
209.097	C15H14O	1100.13	307345	1	1.4092	1.41221	1.40968	0.274128	0.280561	2.51249	2.60281	2.84093	4.64102	4.51638	4.56271	2.53717	2.83785	0.610029	0.561284	0.476455	0.662491	0.590017
209.118	C12H18O3	10610.7	311019	1	3.60818	3.88958	3.57695	6.84168	7.06793	11.8694	11.8168	12.1124	14.6782	14.9768	14.8672	13.6573	14.9657	11.862	10.95	10.9991	1.41346	1.30415
209.13	C11H18N2O2	29.1199	294413	1	0	0	0	0.0189422	0.0126458	0	0	0	0	0	0	0	0	0	0	0	0	0
209.155	C13H22O2	679.395	304329	1	0.187278	0.139242	0.168031	0.44194	0.388846	0.190924	0.16793	0.152784	0.259384	0.515222	0.18777	0.345924	0.525234	0.270367	0.24179	0.269285	0	0
210.041	C9H9NO5	1446.67	308685	1	0.0550825	0.0617397	0.0662691	0	0	1.84551	1.8154	1.57281	10.3587	11.1271	10.9785	6.85363	7.3511	2.65068	2.7226	2.45395	0.194757	0.208464
210.056	C13H9NO2	1180.09	306296	1	0.220308	0.259102	0.19263	0.00975083	0.0153985	1.95434	2.2227	2.42062	17.0268	17.7374	16.0001	4.05571	4.53842	0.182871	0.24565	0.241905	0.0843507	0.0992868
210.077	C10H13NO4	1359.37	307276	1	0.501993	0.587217	0.577901	0.884254	0.839012	1.4968	1.82387	1.86188	8.24943	9.56262	9.76301	5.5967	6.09886	0.696532	0.629071	0.632208	0.534611	0.426919
210.093	C14H13NO	214.524	299673	1	0.0649505	0.0678091	0.0606979	0.00845349	0.0107853	0.130475	0.0648495	0.121439	1.18097	1.86055	1.49609	0.259562	0.198834	0	0	0	0.0311467	0.0355747
210.114	C11H17NO3	800.599	298137	1	0.050087	0.0590905	0.0685417	0.510743	0.533291	0	0	0	0.141974	0.150254	0	0.103406	0.125562	0	0	0	0.0338635	0.0536418
210.989	C8H4O7	119.898	296701	1	0	0	0	0	0	0.0776173	0.0959135	0.131876	0	0	0	0	0	0.702726	0.935398	0.935192	0	0
211.007	C9H8O4S	724.148	292504	1	0.0139669	0.017969	0.0125226	0	0	0.192018	0.191145	0.186771	0.667293	0.723946	0.534656	0.234568	0.137328	0.115072	0.16747	0.0910785	0	0
211.025	C9H8O6	5628.58	307983	1	0.120688	0.0988408	0.12599	0.0165639	0.00860801	15.045	15.9475	15.8958	19.7682	21.1525	20.8314	18.2553	19.3925	44.5374	44.5174	43.4167	0.0839668	0.0555005
211.036	C8H8N2O5	137.804	278427	1	0	0	0	0	0	0	0.144629	0.179695	1.5368	1.42786	1.55533	0.512746	0.455185	0	0.0960233	0.142193	0	0
211.04	C13H8O3	4161.06	308889	1	0.684198	0.76791	0.721778	0.0499944	0.045608	18.8609	19.5348	19.2816	35.8579	38.7799	37.875	21.1047	21.3694	17.9012	17.8164	17.1275	0.14059	0.133768
211.051	C12H8N2O2	890.038	268426	1	0.0331242	0.0368586	0.0434783	0	0	0	0	0	12.5515	12.7482	13.0397	1.09207	1.01928	0	0	0	0.0142259	0.0216303
211.061	C10H12O5	5605.96	310093	1	3.4712	3.7789	3.54482	1.52347	1.70552	24.9671	26.3181	25.9053	29.0261	30.6253	29.6365	29.435	31.791	40.1398	39.6784	39.2462	1.8081	1.85271
211.072	C9H12N2O4	148.818	285823	1	0.0253021	0.0338665	0.0258479	0.0384471	0.0369222	0.102462	0.190846	0.0552141	1.78849	1.64334	1.82166	0.503749	0.415111	0.0978025	0.0818561	0.0595227	0.0145132	0.0213712
211.077	C14H12O2	3172.09	309016	1	2.83251	3.0817	2.80061	0.633884	0.662892	14.815	14.8919	14.6647	25.1721	26.8523	24.8374	15.3111	16.1421	7.55927	7.22755	7.22858	1.57154	1.53244
211.088	C13H12N2O	173.807	288893	1	0.0116465	0.0130215	0.0200017	0	0	0	0	0	1.50646	1.41418	1.22198	0.148933	0.178044	0	0	0	0	0
211.098	C11H16O4	10369.6	310303	1	3.42249	3.7989	3.50618	6.45977	6.90734	16.921	16.8807	17.2132	17.9813	19.308	19.045	18.0962	19.7955	18.1802	17.2678	17.0498	1.28389	1.30681
211.113	C15H16O	1766.16	306154	1	2.23086	2.46358	2.25135	0.707156	0.785019	2.49489	2.49083	2.58379	3.30771	3.99311	3.56735	2.43547	2.44581	0.537095	0.600714	0.402805	1.27156	1.28256
211.134	C12H20O3	3038.9	307598	1	0.393545	0.437543	0.341098	1.97678	1.82765	1.19769	1.11441	1.09077	1.97527	2.64164	2.46196	1.97108	2.21059	2.4425	2.24009	2.68677	0.0342367	0.0494146
212.02	C8H7NO6	543.732	299360	1	0	0	0	0	0	0.163688	0.21415	0.184165	1.42572	2.54657	2.40649	0.560085	0.492062	0.25837	0.325706	0.265342	0	0
212.035	C12H7NO3	1192.16	303658	1	0.0425941	0.065025	0.0506061	0	0	2.16816	2.17672	2.15102	16.478	16.7088	17.466	4.43545	4.58501	0.446449	0.421549	0.265104	0.0365151	0.0126758
212.057	C9H11NO5	497.5	304556	1	0.0613234	0.0718605	0.0775178	0.0352401	0.0395843	1.09935	1.17643	1.30457	5.79173	6.33058	6.28633	3.38826	3.68751	0.942039	1.02078	1.03936	0.128698	0.16164
212.072	C13H11NO2	1092.87	304563	1	0.453275	0.406461	0.388617	0.0650463	0.0451324	1.83753	1.9575	2.19488	13.8223	15.1016	13.8272	3.57075	3.86705	0.161288	0.134061	0.118114	0.186012	0.194459
212.075	C10H15NO2S	28157.2	305598	1	0	0	0	0.0267707	0.024453	0	0	0	0	0	0	0	0	1.14368	1.11405	1.28965	0	0
212.093	C10H15NO4	1182.11	299195	1	0.0337987	0.0540789	0.0358426	0.68145	0.78742	0.117452	0.120042	0.0730484	0.615443	0.753109	0.766426	0.408898	0.31584	0	0	0	0.0317593	0.0400303
212.108	C14H15NO	166.736	296443	1	0.115169	0.101523	0.125345	0.0269809	0.0209266	0.0443872	0	0.042163	0.559315	0.77196	0.567934	0.100048	0.10725	0	0	0	0.046702	0.034448
213.019	C12H6O4	2831.93	306455	1	0.051117	0.0418782	0.061894	0	0	12.4534	12.8001	13.1883	24.7267	26.2402	25.6654	14.8236	15.4767	14.7918	14.4142	14.0032	0	0
213.023	C9H10O4S	1465.52	284047	1	1.12008	1.16354	1.03893	0	0	0.0868704	0.0925673	0.0814012	0.346909	0.615306	0.414878	0.0825007	0.155484	0	0	0	0	0
213.041	C9H10O6	4009.81	307537	1	0.595886	0.597887	0.577092	0.116534	0.101411	12.1644	12.9456	12.8108	14.7921	15.0346	14.9263	13.445	13.8738	29.3956	30.9911	31.2761	0.289699	0.252142
213.056	C13H10O3	6451.48	308071	1	2.31532	2.53147	2.33912	0.232926	0.361398	29.3172	30.2875	29.5384	46.9826	50.1276	48.0548	28.2353	30.6142	19.9032	18.674	19.1535	0.889142	0.95947
213.067	C12H10N2O2	767.557	276911	1	0.0752079	0.105893	0.0756572	0.00904441	0.0079484	0.216091	0.18167	0.222292	10.2044	10.1986	10.2038	1.32323	1.0582	0	0	0	0.0499552	0.046265
213.077	C10H14O5	5639.21	308647	1	2.26663	2.39548	2.34382	2.51933	2.61106	14.3598	15.009	14.8985	18.0586	19.3748	18.6453	16.7837	17.0875	19.3948	19.2005	18.842	0.68988	0.677853
213.088	C9H14N2O4	27.549	273196	1	0	0.0154811	0.0141091	0.00729483	0.00706342	0.0411352	0.0460606	0.102663	0.217339	0.352566	0.272779	0.0958903	0.0661812	0	0	0	0	0
213.092	C14H14O2	3889.17	308413	1	5.0309	5.42494	4.91519	1.48351	1.63544	14.2104	13.9545	14.1674	24.1325	24.3185	23.7992	15.2224	16.5578	7.36983	6.45392	7.0907	2.82087	2.75286
213.103	C13H14N2O	92.5174	283004	1	0.0223203	0.0161189	0	0	0	0	0	0	0.508443	0.699608	0.616953	0.131103	0.139352	0	0	0	0.0211243	0.0116221
213.113	C11H18O4	2879.33	304622	1	0.534316	0.559253	0.560005	1.73409	1.91796	2.54089	2.38976	2.55947	1.70397	2.13999	2.3786	5.3449	5.65995	3.80745	3.67907	3.63069	0.0426326	0.0288258
213.129	C15H18O	2058.7	303483	1	2.70675	2.82613	2.63797	1.02754	1.09152	2.05287	1.91184	1.87017	3.37344	3.08286	2.89914	2.43396	2.66461	0.468015	0.526946	0.491858	1.2494	1.19334
213.15	C12H22O3	48.7582	303623	1	0	0	0	0.0244658	0.0187119	0	0	0	0	0	0	0.0891761	0.164458	0	0	0	0	0
213.186	C13H26O2	450.472	300781	1	0	0	0	0	0	0	0	0	0	0	0	0.623877	0.763056	0	0	0	0	0
214.051	C12H9NO3	1562.1	304501	1	0.256685	0.284806	0.238153	0.0102607	0.0148668	4.18596	4.42235	4.69571	22.2156	23.4793	22.0739	6.87983	7.10301	0.567754	0.486676	0.702062	0.144958	0.127319
214.072	C9H13NO5	248.104	284006	1	0	0.0282434	0.030502	0.0427247	0.0397	0.168733	0.0846589	0.106222	1.20512	1.38245	1.54663	0.728844	0.825413	0	0.129835	0.0815379	0.025021	0.0182264
214.087	C13H13NO2	1027.43	302765	1	0.686925	0.72102	0.674577	0.209621	0.27028	1.2811	1.21498	1.25887	11.0148	10.5456	10.1945	2.90301	2.90044	0.0731804	0.108095	0.119443	0.503122	0.575368
214.124	C14H17NO	147.968	298506	1	0.0788674	0.0779587	0.0905732	0.0402093	0.0310693	0	0	0	0.154048	0.254965	0.174795	0	0	0	0	0	0.0362644	0.0339947
214.999	C11H4O5	757.109	305103	1	0	0	0	0	0	2.87289	3.17105	3.52585	5.27104	5.69432	6.52199	5.45232	5.46978	5.74093	5.44946	5.46664	0	0
215.002	C8H8O5S	496.946	299300	1	0.335735	0.341161	0.303349	0.10521	0.0852451	0.162895	0.219461	0.180711	5.18626	4.77367	4.66808	0.23123	0.222939	0.367652	0.283979	0.322238	0	0
215.035	C12H8O4	7517.31	306243	1	0.95186	0.988859	0.973998	0.0323697	0.0251311	33.0711	35.2912	34.4649	54.0451	55.2575	54.3797	31.7474	34.2044	29.2376	28.8681	27.3503	0.180639	0.148137
215.038	C9H12O4S	946.09	274181	1	0.0316597	0.0394415	0.0304405	0	0	0	0	0	0.179668	0	0.200718	0	0	0	0	0	0	0
215.046	C11H8N2O3	728.897	241983	1	0.0291311	0.047397	0.0603026	0	0	0.284753	0.341162	0.391612	9.37592	10.9558	10.6012	1.1528	1.54206	0.201735	0.093948	0.109933	0.0306571	0.0390483
215.056	C9H12O6	2049.3	305630	1	0.351185	0.406484	0.372422	0.194366	0.216506	7.33935	7.1585	7.93512	10.407	11.0352	10.5565	8.48537	9.14683	15.4436	15.5145	15.9844	0.195221	0.200855
215.071	C13H12O3	7417.48	305975	1	5.21032	5.75834	5.19353	1.26854	1.46921	34.6273	34.8225	33.7504	49.7878	51.412	51.6374	36.0524	38.6269	21.9024	20.7799	19.6148	2.68752	2.70891
215.083	C12H12N2O2	716.991	282820	1	0.193845	0.179909	0.144716	0.0713993	0.0719655	0.181923	0.143137	0.149418	8.97306	7.83188	8.7384	1.66644	1.36436	0	0	0	0.133016	0.143906
215.093	C10H16O5	2596.12	303953	1	0.344316	0.35353	0.393299	1.07044	1.09367	2.04279	2.3984	2.25731	4.67195	4.958	5.27149	5.0184	5.27021	5.01118	5.04906	4.82951	0.0446966	0.0302765
215.108	C14H16O2	5944.02	306365	1	7.65304	8.07692	7.61653	3.23551	3.39071	12.9805	13.2176	13.8224	23.7482	24.029	23.2252	17.7503	18.7012	9.29682	8.80937	8.67113	3.78815	3.56378
215.129	C11H20O4	294.519	301866	1	0	0	0	0.0764788	0.0821373	0	0	0	0	0	0	0.19493	0.168853	0.0826213	0	0.102725	0	0
215.144	C15H20O	2296.22	301683	1	2.90921	2.9495	2.94232	1.21252	1.24926	1.665	1.52553	1.82448	1.9428	2.06294	2.45879	2.31749	2.3686	0.37489	0.479855	0.375037	0.953898	0.945135
215.165	C12H24O3	94.9058	301778	1	0	0	0	0	0	0	0	0	0	0	0	0.12477	0.158246	0	0	0	0	0
216.013	C11H7NO2S	55.9541	268697	1	0	0	0	0	0	0	0	0	0.560356	0.841025	0.697122	0.107261	0.156565	0	0	0	0	0
216.03	C11H7NO4	1263.8	301648	1	0.0328476	0.0334847	0.018805	0	0	2.68656	2.83869	2.91305	16.9391	18.9958	17.7325	5.0509	5.11252	0.55543	0.706156	0.635426	0.0275789	0.013157
216.067	C12H11NO3	1711.84	305318	1	0.8503	0.939867	0.811494	0.17738	0.200579	4.83714	5.07175	5.12975	24.396	25.5178	25.0797	9.54403	10.0983	0.768333	0.864092	0.694659	0.812307	0.740897
216.078	C11H11N3O2	82.7694	286668	1	0	0	0	0.00639308	0.0068425	0	0	0	1.20691	0.656842	1.21263	0.108738	0.078303	0	0	0	0	0
216.103	C13H15NO2	1146.3	301096	1	0.907303	0.994939	0.881504	0.665163	0.717126	0.466403	0.470012	0.45689	6.0993	6.22094	6.28617	1.86135	2.26476	0	0	0	1.03059	0.904305
216.997	C11H6O3S	41.5816	273071	1	0	0	0	0	0	0.0577233	0.0515963	0.0796399	0.526876	0.306684	0.607383	0.0942942	0.0768935	0	0	0	0	0
217.014	C11H6O5	4991.18	303155	1	0.0772179	0.120992	0.118535	0	0	21.5797	23.4319	22.3973	32.0638	35.3494	33.8108	20.8323	22.0308	25.8873	26.1889	25.4318	0	0
217.018	C8H10O5S	124.39	287928	1	0	0	0	0	0	0.0383288	0.0694173	0.124474	0.443955	0.648544	0.350526	0.113033	0.0870548	0	0	0	0	0
217.026	C10H6N2O4	175.7	275415	1	0	0	0	0	0	0	0	0	1.97741	2.64088	2.19361	0.393615	0.266517	0	0	0	0	0
217.035	C8H10O7	654.657	298046	1	0	0	0	0	0	1.95292	2.03295	1.82666	1.99053	1.50533	1.35756	1.25232	1.38384	5.49962	4.67416	4.8021	0	0
217.051	C12H10O4	10760.2	305748	1	3.03348	3.39084	3.09826	0.509049	0.5951	49.8203	50.5153	49.8933	67.3045	69.7345	68.6805	49.6016	53.562	44.4608	42.4304	41.6772	1.34398	1.2581
217.062	C11H10N2O3	1051.81	288112	1	0	0	0	0.0311989	0.0282023	0.39021	0.546551	0.538219	14.8018	15.8094	14.5399	3.8822	3.9911	0.24808	0.0891813	0.135476	0.282383	0.210717
217.066	C16H10O	708.251	299097	1	0.0736525	0.0822768	0.0816535	0	0	2.84346	3.08996	3.29832	7.39704	7.68045	7.89673	3.09619	3.53258	1.32828	1.34605	1.05747	0	0
217.072	C9H14O6	1290.07	297918	1	0.0362432	0.0303955	0.037739	0.0241122	0.019844	0.848167	0.875865	1.01679	2.05189	2.093	2.80411	1.49963	1.47447	2.0493	1.88475	1.80632	0.0206829	0.0334778
217.087	C13H14O3	7556.59	304796	1	9.57383	10.2525	9.68284	3.69169	3.97443	31.3794	31.1093	32.2498	47.6459	49.2824	47.6217	38.8187	42.1637	24.2585	22.5516	22.6554	4.95014	4.77204
217.098	C12H14N2O2	514.646	295089	1	0.193842	0.2268	0.282754	0.253623	0.251089	0	0.06798	0.0700624	3.80501	4.59353	4.7847	0.597493	0.661624	0	0	0	0.21618	0.245751
217.108	C10H18O5	602.842	296925	1	0	0	0	0.0379327	0.0234498	0	0	0	0.31293	0.286821	0.130596	0.679367	0.506217	0.343415	0.306387	0.45078	0	0
217.123	C14H18O2	8574.17	304746	1	9.38642	9.49018	9.39138	5.57742	5.6624	12.8936	12.9035	12.9545	24.0913	25.5105	25.4962	18.1998	18.1488	11.2415	11.1615	10.9648	3.82463	3.76939
217.16	C15H22O	1306.8	298285	1	1.66541	1.82284	1.64751	0.676991	0.733678	0.421112	0.46629	0.482164	0.973439	0.717926	1.16821	1.20829	1.31028	0.0818971	0.124538	0.177008	0.257386	0.199334
218.028	C11H9NO2S	38.3191	271496	1	0	0	0	0	0	0	0	0	0.479665	0.368652	0.542952	0.105939	0.137205	0	0	0	0	0
218.046	C11H9NO4	1804.82	303692	1	0.264008	0.31248	0.321625	0.025097	0.0257731	5.20969	5.47116	6.08829	25.861	26.4022	26.4419	11.4666	11.7387	2.73087	2.49876	2.26696	0.26053	0.270667
218.082	C12H13NO3	1712.83	303414	1	1.43359	1.47281	1.48293	0.777103	0.945023	3.74854	3.57771	3.55365	18.4235	19.5326	18.7969	7.9926	9.156	0.599683	0.413759	0.49077	1.60033	1.57742
218.119	C13H17NO2	1397.5	300113	1	0.724409	0.730107	0.674495	0.844686	0.930897	0.182908	0.114565	0.177507	1.98639	2.25742	2.24346	0.634994	0.921769	0	0	0	0.654367	0.690419
218.997	C7H8O6S	58.2243	289952	1	0	0	0	0	0	0	0	0	0.489079	0.599104	0.738227	0	0	0	0	0	0	0
219.012	C11H8O3S	380.244	280010	1	0	0	0	0	0	0.491141	0.530077	0.553804	0.977464	1.00135	1.15516	0.506416	0.430208	0.453713	0.344286	0.529716	0	0
219.03	C11H8O5	9963.99	305661	1	1.03664	1.14811	0.941621	0.0525429	0.0506927	43.4685	43.0535	46.4022	59.1625	58.697	59.6066	46.9566	50.6113	65.4903	62.3192	62.2871	0.214887	0.240667
219.033	C8H12O5S	166.32	273300	1	0	0	0	0	0	0	0.0422817	0.0834423	0.66844	0.822555	0.66356	0	0	0	0	0	0	0
219.041	C10H8N2O4	737.63	291355	1	0	0	0	0	0	0.379627	0.398183	0.501181	9.99979	10.5989	10.8068	2.52358	2.79753	0.254407	0.241551	0.134572	0.0431777	0.0606186
219.045	C15H8O2	1186.37	301098	1	0.0526181	0.0372867	0.056718	0	0	5.12603	5.10884	5.52493	12.3109	11.568	11.9501	7.10382	7.27338	3.7251	3.44794	3.88407	0	0
219.066	C12H12O4	10727.9	304913	1	6.48984	6.78895	6.64247	2.08963	2.15199	46.1093	46.2431	49.9599	60.3476	61.9044	63.2149	56.1691	58.7238	46.5294	44.6053	44.7148	3.17894	3.15032
219.078	C11H12N2O3	1001.19	296224	1	0.356093	0.311503	0.278648	0.168886	0.182883	0.519405	0.455511	0.450676	12.176	13.1944	12.5588	3.00949	3.43749	0.165417	0.132067	0.154553	0.406789	0.346593
219.082	C16H12O	483.091	298410	1	0.103599	0.131579	0.166636	0	0	2.24512	1.95149	2.24975	4.96148	5.09187	4.04284	1.85741	1.75604	0.575345	0.429843	0.440283	0.0162579	0.0294954
219.103	C13H16O3	14039	303648	1	13.1703	13.1582	13.042	9.08712	9.3516	29.0971	29.6269	29.6301	43.7459	48.0829	46.9247	39.1071	41.0335	27.6578	27.1475	27.4437	6.42345	6.20351
219.114	C12H16N2O2	480.29	297360	1	0.13956	0.134643	0.103396	0.294593	0.319928	0	0	0	0.76999	0.819814	0.562541	0.126096	0.227034	0	0	0	0.242129	0.235198
219.139	C14H20O2	6791.3	303308	1	5.95511	6.2895	6.10338	4.38293	4.52379	7.21515	7.60168	7.66634	14.7635	15.4494	14.7697	11.6619	12.7767	7.21422	7.08977	7.22393	2.20363	2.0668
219.176	C15H24O	304.759	297303	1	0.266538	0.231683	0.232541	0.112307	0.11442	0.130698	0.151342	0.106572	0.523018	0.479755	0.526344	0.448535	0.452053	0.103325	0.112959	0.160786	0	0
220.025	C10H7NO5	1224.54	297294	1	0.0157794	0.0254627	0.0178261	0	0	2.32178	2.69595	2.67267	15.063	15.8542	16.2636	5.5492	6.3534	1.9552	1.71003	1.75189	0.0180249	0.0109451
220.041	C14H7NO2	245.542	285062	1	0	0	0	0	0	0.204322	0.202378	0.187826	3.1767	3.30904	3.59737	0.626008	0.568888	0	0	0	0	0
220.062	C11H11NO4	1762.72	303538	1	0.807865	0.871547	0.831089	0.244068	0.3072	5.31113	5.61701	5.62516	23.7475	24.5437	24.9283	12.3985	13.0654	2.64162	2.28247	2.56973	0.944015	0.929542
220.073	C10H11N3O3	89.4206	276632	1	0.0193965	0	0.0138526	0	0	0	0	0	1.28766	1.34405	1.20163	0.077594	0.106604	0	0	0	0	0
220.077	C15H11NO	174.118	291799	1	0	0.0231577	0.0178573	0	0	0.159683	0.0797455	0.165774	2.3383	1.84547	2.55096	0.413439	0.252141	0	0	0	0	0
220.098	C12H15NO3	2260.27	301397	1	1.37534	1.47853	1.42355	1.35417	1.5056	1.5613	1.69829	1.61656	10.5544	11.3312	10.3607	5.47828	6.38325	0.292444	0.268334	0.273607	1.85691	1.87702
220.109	C11H15N3O2	18.9556	275281	1	0	0	0	0.0111668	0.011434	0	0	0	0	0.167439	0.187598	0	0	0	0	0	0	0
220.992	C10H6O4S	295.576	281265	1	0	0	0	0	0	0.0547988	0.0514243	0	0.388788	0.578993	0.591565	0.0665371	0.12746	0	0	0	0	0
221.009	C10H6O6	6369.56	302555	1	0.0676977	0.0552181	0.0407198	0	0	24.3477	24.262	26.6239	28.4647	28.2486	29.2825	30.1237	30.5638	49.6603	50.3779	49.5322	0.018461	0.0159914
221.013	C7H10O6S	216.454	272388	1	0	0	0	0	0	0	0	0	3.10031	3.25343	2.68158	0	0	0	0	0	0	0
221.02	C9H6N2O5	186.923	283353	1	0	0	0	0	0	0.0765835	0.0663165	0.0655267	2.85262	2.66393	2.5937	0.514466	0.485313	0	0	0	0	0
221.025	C14H6O3	71.3327	280127	1	0	0	0	0	0	0.304567	0.233704	0.304751	0.860272	0.772805	0.694365	0.507584	0.528724	0.317629	0.328378	0.294681	0	0
221.046	C11H10O5	9648.81	304440	1	2.42906	2.71107	2.5093	0.446097	0.570359	41.6464	42.2105	44.9345	52.6236	52.8303	53.2562	45.8964	49.0981	67.0264	64.5653	64.1707	1.01292	1.13457
221.057	C10H10N2O4	708.333	289389	1	0.116816	0.0875539	0.0764635	0.0262916	0.0334186	0.39348	0.546394	0.525373	9.98953	10.4438	10.3776	2.57026	2.56943	0.244374	0.300088	0.240357	0.0988034	0.12046
221.061	C15H10O2	2243.12	301740	1	0.554123	0.557205	0.538097	0.0147736	0.0189365	9.70828	9.65969	10.4462	19.8515	20.9655	21.1314	10.8094	11.0988	6.73187	6.39527	6.00141	0.104532	0.126704
221.072	C14H10N2O	122.285	283192	1	0	0	0	0	0	0	0	0	1.80574	1.83802	1.74869	0.193154	0.160859	0	0	0	0	0
221.082	C12H14O4	9686.97	303325	1	9.68992	10.0267	9.57735	5.88099	6.45264	40.0855	40.5805	42.4976	53.619	52.9082	52.9189	53.1043	57.0975	44.961	42.3976	43.1173	5.30306	4.76704
221.093	C11H14N2O3	539.111	294787	1	0.280911	0.275937	0.222023	0.350687	0.347391	0.159239	0.206445	0.125987	4.89312	6.08091	6.00669	1.3399	1.40248	0	0	0	0.336062	0.344802
221.097	C16H14O	810.953	298202	1	0.944595	1.01519	1.03914	0.0985906	0.111013	2.06186	2.26378	2.5065	3.88819	3.25089	3.21334	2.06707	2.26834	0.498288	0.219905	0.273359	0.25546	0.281802
221.118	C13H18O3	18132.7	302566	1	9.12806	9.56533	9.00205	11.3647	12.0784	20.1625	20.3526	20.5064	32.9697	33.0514	31.8586	27.4214	29.5493	22.486	20.6537	21.0766	4.24069	4.02762
221.13	C12H18N2O2	130.026	287484	1	0.0200824	0.0220512	0.0175002	0.0759186	0.0866122	0	0	0	0	0	0	0	0	0	0	0	0.0470027	0.0183814
221.131	C10H23O3P	1701.76	299834	1	0.0679839	0.0526723	0.0431818	0.754844	1.13357	0	0	0	0	0	0	0	0	0.0725955	0.0724739	0	0.0505864	0.0316998
221.155	C14H22O2	2694.94	301428	1	1.82847	1.8068	1.74222	1.75303	1.63192	1.48751	1.28449	1.3516	2.96603	3.44167	3.26621	3.37031	3.80053	2.33343	2.56202	2.70479	0.229819	0.257416
221.987	C9H5NO4S	23.2201	263780	1	0	0	0	0	0	0	0	0	0.167879	0.349012	0.338104	0	0	0	0	0	0	0
222.005	C9H5NO6	294.73	286688	1	0	0	0	0	0	0.199015	0.117355	0.170206	2.54508	2.66515	2.5996	0.531666	0.546602	0.237402	0.150386	0.125793	0	0
222.041	C10H9NO5	1409.75	301703	1	0.109704	0.133471	0.0993375	0.0107619	0.0118325	3.27159	3.6277	3.32936	15.9929	17.1085	16.1642	7.16435	7.5573	2.54345	2.48171	2.45466	0.117332	0.141114
222.056	C14H9NO2	652.772	294194	1	0.0224052	0.0181452	0.0345283	0	0	0.965585	0.689291	0.870343	8.69397	9.81156	8.00563	1.81991	1.89015	0	0	0	0	0
222.077	C11H13NO4	1739.27	302099	1	1.03081	1.08767	0.981351	1.04249	1.15855	3.44465	3.52983	3.99589	16.9175	16.8836	17.0682	9.67023	10.9099	1.73404	1.62678	1.52932	1.31135	1.2057
222.089	C10H13N3O3	52.4226	283434	1	0	0.0153511	0.0163885	0.0136454	0.00806481	0	0	0	0.500638	0.566634	0.447522	0	0	0	0	0	0	0
222.093	C15H13NO	147.638	287803	1	0.0540559	0.0452015	0.0372503	0	0	0.138393	0.0467374	0.089095	1.09495	1.06074	1.15579	0.171982	0.119691	0	0	0	0	0
222.114	C12H17NO3	2212.43	295900	1	0.521525	0.59715	0.525462	1.37938	1.47373	0.178629	0.188909	0.143838	1.56767	1.65503	1.70952	1.03128	1.24296	0	0	0	0.686499	0.65719
222.15	C13H21NO2	34.525	285285	1	0	0	0	0.0187601	0.0229976	0	0	0	0	0	0	0	0	0	0	0	0	0
222.989	C9H4O7	1048.14	295557	1	0	0	0	0	0	4.29804	4.60963	4.88119	1.31398	1.00329	1.28435	2.34385	2.52387	5.96364	6.05611	5.86009	0	0
223.007	C10H8O4S	553.757	284025	1	0.0615308	0.0824142	0.0757346	0	0	0.116347	0.196769	0.163275	0.917772	0.803046	0.663431	0.233105	0.40562	0.142335	0.210368	0.115771	0	0
223.022	C14H8OS	20.8173	249512	1	0	0	0	0	0	0.0807448	0	0.0369811	0.188666	0	0.157976	0	0	0	0	0	0	0
223.025	C10H8O6	7225.23	300633	1	0.274151	0.346593	0.293255	0.033953	0.0394953	22.8966	23.9703	24.9126	30.8263	32.1872	31.1945	22.5893	23.1023	56.8269	56.0637	56.3561	0.0522138	0.0785159
223.036	C9H8N2O5	262.171	271133	1	0	0	0	0	0	0.10825	0.177121	0.146936	3.30042	3.94059	3.75218	0.602765	0.596106	0.129344	0.0981966	0	0	0
223.04	C14H8O3	2252.3	300657	1	0.15988	0.175054	0.140699	0	0	10.074	10.4627	10.4889	19.9611	21.5241	21.071	12.3816	12.1804	9.62339	9.3574	9.16377	0.0247973	0.018577
223.061	C11H12O5	8825.77	302376	1	4.23582	4.63881	4.34225	1.86743	2.06479	39.5465	38.8978	41.1016	45.159	46.0799	46.4579	47.0881	50.4474	63.1875	60.366	60.245	2.56606	2.52005
223.072	C10H12N2O4	465.153	285230	1	0.0858838	0.0871262	0.121615	0.125734	0.140579	0.324719	0.366167	0.282673	6.08083	6.90783	5.96448	1.86577	2.12013	0	0.102294	0.146471	0.150094	0.128862
223.077	C15H12O2	2872.86	301343	1	2.39707	2.37048	2.37103	0.392301	0.410374	12.5085	12.4024	13.3789	22.7738	23.6104	23.8187	13.2634	13.6967	6.20337	6.6609	6.65156	1.12226	1.07855
223.088	C14H12N2O	136.512	285828	1	0	0.0224108	0.017216	0	0	0	0	0	1.34904	1.12158	1.66301	0	0	0	0	0	0	0
223.098	C12H16O4	22322.5	301690	1	8.67307	9.44096	8.9314	13.9825	14.8693	32.1431	31.5322	31.8812	37.1029	38.6371	37.5426	37.3474	39.3106	35.745	32.584	32.9645	4.3587	4.23477
223.109	C11H16N2O3	302.934	290663	1	0.0526359	0.0655081	0.0474606	0.197056	0.189111	0	0	0	1.01979	0.943689	1.14469	0.126026	0.213796	0	0	0	0.0558075	0.0647835
223.113	C16H16O	1023.08	295368	1	1.28816	1.36788	1.287	0.21421	0.24271	1.29796	1.48409	1.39865	1.97083	1.96944	2.26364	1.37433	1.21857	0.256918	0.190102	0.164374	0.47101	0.470301
223.134	C13H20O3	8777.54	302351	1	3.42475	3.58101	3.4218	5.70971	5.83056	7.74731	7.55309	7.76202	13.246	14.2969	12.6201	10.3818	11.0775	9.46355	9.22669	9.6601	0.996391	0.929738
223.17	C14H24O2	148.741	291840	1	0.0398496	0.0155641	0.0311461	0.0305315	0.0293661	0	0	0	0	0	0	0.0964111	0.0608071	0	0	0	0	0
224.02	C9H7NO6	611.82	291643	1	0	0	0	0	0	0.347545	0.458772	0.357739	3.59453	4.05226	4.43466	1.17793	1.2439	0.559321	0.504963	0.546535	0	0
224.035	C13H7NO3	475.017	291256	1	0	0	0	0	0	0.590189	0.516004	0.3557	5.99047	7.1398	6.70232	1.16322	1.46726	0	0	0	0	0
224.057	C10H11NO5	1231.3	301305	1	0.194657	0.271248	0.252023	0.0669604	0.096143	3.16062	3.22482	3.33186	12.5754	13.4143	13.6621	7.70521	8.4697	2.34915	2.5661	2.2853	0.524841	0.471032
224.068	C9H11N3O4	52.6714	250801	1	0	0	0	0	0	0	0	0	0.554387	0.791684	0.476815	0.131617	0.0792235	0	0	0	0	0
224.072	C14H11NO2	991.915	298159	1	0.319478	0.351836	0.323352	0.030793	0.0435513	1.61978	1.6308	1.64107	12.9802	14.3689	13.0043	3.32078	3.61685	0.0865641	0	0.114317	0.0726503	0.125169
224.083	C13H11N3O	28.8325	232647	1	0	0	0	0	0	0	0	0	0.172428	0.24847	0.385068	0	0	0	0	0	0	0
224.093	C11H15NO4	3018.7	297363	1	0.537674	0.671913	0.575729	1.82609	2.0108	0.845787	0.756838	0.980649	5.77912	5.5767	5.78442	3.68721	4.06007	0.403569	0.390223	0.204028	0.597417	0.474575
224.104	C10H15N3O3	19.589	281142	1	0	0	0	0.00779712	0.0127105	0	0	0	0.172333	0.138439	0.140917	0	0	0	0	0	0	0
224.108	C15H15NO	110.57	290351	1	0.0381908	0.0424696	0.0516369	0	0	0	0	0	0.291188	0.614192	0.407246	0.0625216	0.0723316	0	0	0	0	0
224.129	C12H19NO3	432.381	283860	1	0.0158093	0.0269414	0.0209562	0.26985	0.288015	0	0	0	0	0	0	0	0	0	0	0	0.0322731	0.0240138
225.004	C9H6O7	1949.55	296622	1	0	0	0	0	0	5.15869	5.1288	5.9711	5.75039	7.62327	6.32205	5.46089	5.21121	12.7148	12.9588	13.4527	0	0
225.019	C13H6O4	919.021	297090	1	0	0	0	0	0	4.03452	4.12094	4.27987	7.82189	8.90216	8.87575	5.36477	5.99365	5.2543	5.12998	5.22152	0	0
225.023	C10H10O4S	1258.44	269003	1	0.74184	0.823101	0.691933	0.079091	0.061073	0.248157	0.157009	0.19867	0.683707	0.816232	0.79577	0.283801	0.360591	0.134899	0.211045	0.187648	0	0
225.031	C12H6N2O3	71.1777	212739	1	0	0	0	0	0	0	0	0	1.08624	1.00107	0.91459	0	0	0	0	0	0	0
225.041	C10H10O6	7070.63	301577	1	0.878012	1.08667	0.900575	0.141276	0.14161	24.2716	23.8675	24.619	26.7046	28.046	26.1192	25.6835	27.6251	57.9976	55.9229	54.6437	0.548316	0.494912
225.052	C9H10N2O5	255.754	270381	1	0.0204001	0.0180471	0.0147793	0	0	0.406406	0.532308	0.623063	2.80074	2.95542	3.74699	1.00187	1.08037	0.223231	0.258471	0.248878	0.0236967	0.0325587
225.056	C14H10O3	5503.33	298790	1	1.85599	1.8994	1.87579	0.167035	0.187136	23.6206	24.5909	25.629	42.008	44.4646	43.7277	26.2119	26.7689	17.2573	16.6029	16.9657	0.707601	0.691753
225.059	C11H14O3S	2968.37	243086	1	3.75949	4.14053	3.79448	0	0	0.0791695	0.123275	0.184526	0.213753	0.386751	0.272569	0.311617	0.263557	0	0	0	0.0408972	0.037707
225.067	C13H10N2O2	749.144	270022	1	0.0825923	0.111058	0.0776716	0.00979597	0.00556253	0.2586	0.276343	0.352295	9.35806	10.4178	10.0094	1.27638	1.45723	0	0	0	0.0683758	0.0501209
225.077	C11H14O5	9881.39	300627	1	5.5449	5.86501	5.62846	6.42775	6.53108	31.8234	32.5213	33.4795	33.4703	35.4075	35.2282	35.486	37.0848	41.6693	41.0094	41.2258	2.39321	2.39228
225.088	C10H14N2O4	416.245	281993	1	0.0554421	0.0631059	0.0423576	0.234535	0.277267	0	0.122485	0.128651	1.95397	2.21833	2.2342	0.56334	0.684699	0	0	0	0.0530679	0.0790653
225.092	C15H14O2	2685.85	300278	1	3.39267	3.62045	3.37664	0.801545	0.902611	10.8492	10.5282	11.2392	17.6184	18.6165	18.4917	11.4855	12.055	4.9283	4.26867	4.43263	1.73437	1.87325
225.103	C14H14N2O	81.6211	267776	1	0.0159012	0.0172813	0.0155456	0	0	0	0	0	0.465835	0.519237	0.662563	0.0597011	0.0633094	0	0	0	0	0
225.113	C12H18O4	14875.4	300016	1	4.01265	4.37109	4.05955	9.23789	9.9087	14.5078	14.963	14.4311	16.8992	18.2307	17.4544	18.573	19.7648	18.4445	17.4805	17.7511	1.41198	1.37837
225.125	C11H18N2O3	26.7015	279384	1	0	0	0	0.0173691	0.0124547	0	0	0	0	0	0	0	0	0	0	0	0	0
225.129	C16H18O	1606.23	295317	1	2.05782	2.2328	2.05819	0.577308	0.579168	1.27731	1.289	1.17932	1.87439	1.78964	1.84164	1.16493	1.50833	0.208211	0.32966	0.186873	0.906158	0.888037
225.15	C13H22O3	1141.81	292710	1	0.169188	0.222319	0.147147	0.742734	0.711366	0.286366	0.217899	0.336637	0.845186	0.707123	0.701754	0.810725	0.88879	0.488622	0.58648	0.521805	0	0
226.036	C9H9NO6	873.175	294334	1	0	0.0155929	0.010246	0	0	0.789879	0.863777	0.974593	3.74004	3.69807	4.38524	2.65118	2.45156	0.990962	1.10071	0.877971	0.0219757	0.0316594
226.047	C8H9N3O5	26.7256	199947	1	0	0	0	0	0	0.0559639	0.0455073	0	0.182625	0.401703	0.276881	0	0	0	0	0	0	0
226.051	C13H9NO3	1608.78	297729	1	0.245845	0.299756	0.239575	0.016984	0.0113662	4.02816	3.9653	4.12195	22.5509	24.1809	23.2667	6.3742	7.3677	0.407114	0.523563	0.538215	0.127438	0.130728
226.072	C10H13NO5	885.821	296107	1	0.181648	0.210713	0.164609	0.546649	0.552199	1.08714	1.25033	1.24857	5.75697	7.00463	6.03574	4.35442	5.09803	0.631584	0.963333	0.744725	0.275615	0.279646
226.087	C14H13NO2	924.725	295729	1	0.495289	0.539466	0.520751	0.0720655	0.097117	1.03982	1.12235	0.997925	8.50449	10.1889	8.84809	2.15047	2.4944	0	0	0	0.236473	0.286962
226.109	C11H17NO4	1713.01	291662	1	0.0976775	0.0395345	0.0532424	1.1143	1.08648	0	0	0	0.188267	0.397283	0.195541	0.236037	0.261166	0	0	0	0.0203242	0.0256791
226.124	C15H17NO	125.569	287973	1	0.063521	0.0465648	0.0720566	0.0152344	0.0128396	0	0	0	0.209819	0.180256	0.14708	0	0	0	0	0	0	0
227.017	C13H8O2S	223.624	267805	1	0	0	0	0	0	0.350359	0.253987	0.298013	0.490099	0.715321	0.826145	0.364253	0.391661	0.131469	0.205126	0.274509	0	0
227.02	C9H8O7	2275.65	291217	1	0	0.020209	0.0128426	0	0	5.84333	6.13748	6.36315	3.88952	4.70908	4.57523	3.61593	3.95706	17.3899	17.4285	17.7498	0	0
227.035	C13H8O4	6215.15	298326	1	0.543205	0.702622	0.570485	0.010801	0.0223878	28.4649	27.8987	28.9439	47.8735	48.5369	48.5241	28.3561	31.5701	25.4708	23.7512	23.421	0.137534	0.141107
227.038	C10H12O4S	1707.45	262515	1	0.209883	0.210497	0.160352	0	0	0.0855643	0.135743	0.179428	0.66795	0.556912	0.484338	0.187444	0.280274	0.0907051	0.0760851	0.145274	0	0
227.046	C12H8N2O3	934.349	263373	1	0.0534959	0.0562385	0.0378447	0	0	0	0	0	12.3701	14.0439	12.7904	1.30387	1.4861	0	0	0	0.038679	0.0114703
227.056	C10H12O6	4602.23	298992	1	1.81989	1.89075	1.87233	0.927998	0.979412	20.1497	20.698	21.4325	20.8709	22.583	21.1781	18.6438	19.4021	34.339	35.197	34.5458	0.818863	0.733712
227.067	C9H12N2O5	97.9782	262497	1	0.0121183	0	0.011963	0.0136865	0.00529789	0.248384	0.374138	0.396191	0.953596	1.43669	1.43545	0.273352	0.407869	0	0.130997	0.126878	0	0
227.071	C14H12O3	5988.45	297964	1	3.55961	3.94679	3.75432	0.630058	0.708582	26.2613	26.5666	27.8882	43.5566	44.0073	43.0897	28.084	31.5625	16.076	14.7202	14.6247	1.83228	1.76727
227.075	C11H16O3S	646.057	243219	1	0.899184	0.854252	0.754329	0.011308	0.00989539	0	0	0	0	0	0	0	0	0	0	0	0	0
227.083	C13H12N2O2	767.137	278579	1	0.183053	0.180363	0.147819	0.0281861	0.0307817	0.207547	0.159529	0.224706	9.07831	8.64709	8.59511	1.24788	1.50561	0	0	0	0.125342	0.0941176
227.093	C11H16O5	12531.4	298761	1	3.36656	3.49023	3.38537	7.95268	8.34735	16.8263	17.8922	17.664	18.5668	20.1252	19.1891	20.8413	21.5211	22.4999	22.3181	21.3362	0.841504	0.707503
227.104	C10H16N2O4	134.672	264866	1	0.0169034	0.0166891	0.0153615	0.0724304	0.0897072	0	0	0	0.175537	0	0.219297	0	0	0	0	0	0	0
227.108	C15H16O2	4282.9	297629	1	5.53143	5.62985	5.48801	1.74669	1.77528	9.80022	9.60238	10.1688	17.8022	17.9444	17.7929	12.3478	13.0866	5.08513	4.67462	4.83804	2.85066	2.70308
227.129	C12H20O4	2319.45	292912	1	0.439358	0.368571	0.476065	1.43046	1.54502	0.912328	1.06134	0.879193	1.5051	1.50418	1.60675	2.88328	3.66607	2.65467	2.51536	2.34726	0.0551289	0.0463295
227.144	C16H20O	1769.16	293330	1	2.31566	2.37814	2.26696	0.708967	0.746073	0.95354	0.7341	0.821659	1.56213	1.63953	1.15032	1.13726	1.05775	0.386302	0.128794	0.338124	0.906548	0.999367
227.202	C14H28O2	1493.5	289345	1	0	0	0	0	0	0	0	0	0	0	0	4.12647	4.35289	0	0	0	0	0
228.03	C12H7NO4	1294.57	294417	1	0.0112224	0.0354226	0.0318532	0	0	3.04835	2.82841	3.2204	17.9925	18.8799	18.9664	4.92053	5.19958	0.575991	0.41053	0.60341	0	0
228.042	C11H7N3O3	213.187	218156	1	0	0	0	0	0	0	0	0	2.34358	3.20433	2.84376	0.109268	0.139075	0	0	0	0	0
228.051	C9H11NO6	233.585	290885	1	0	0	0	0	0	0.450633	0.350685	0.634405	2.50956	2.11533	2.31876	1.0263	1.33848	0.400998	0.393421	0.316376	0.0198255	0.0208399
228.067	C13H11NO3	1688.43	296782	1	0.744227	0.672465	0.607167	0.0567263	0.0818584	4.42155	4.56334	4.56455	23.4704	25.1738	24.7368	8.27465	8.45836	0.777832	0.613479	0.374193	0.340116	0.338196
228.078	C12H11N3O2	105.043	216282	1	0	0.0362378	0.0360794	0	0	0	0	0	1.39153	1.1861	1.38106	0	0	0	0	0	0	0
228.088	C10H15NO5	943.191	286223	1	0.0352726	0.0437259	0.0275292	0.613537	0.624713	0.0534631	0.0924481	0.117517	0.537882	0.789383	0.614252	0.425593	0.638383	0	0	0	0.0145713	0.0285335
228.103	C14H15NO2	1105.16	294720	1	0.7096	0.780255	0.751312	0.300635	0.295588	0.556189	0.57058	0.396452	5.06481	5.41412	5.54515	1.46221	1.52706	0	0	0	0.504721	0.46902
229.014	C12H6O5	4187.76	296513	1	0.0404368	0.0449198	0.0227889	0	0	18.6787	18.8887	19.5024	30.3451	32.0414	30.8841	17.9952	20.2101	21.7159	20.0956	19.9455	0	0
229.018	C9H10O5S	1001.32	285056	1	0.0260364	0.0239236	0.0233974	0	0	0.405187	0.414752	0.33618	1.29585	1.47918	1.32313	0.214974	0.262288	0.076886	0.152329	0	0	0
229.026	C11H6N2O4	395.114	268553	1	0.0113271	0	0.00988827	0	0	0	0	0	5.50095	5.93881	5.68169	0.512829	0.517488	0	0	0	0	0
229.035	C9H10O7	2565.35	295371	1	0.0560071	0.0706966	0.0499717	0.00872737	0.00990163	7.97626	8.10501	8.10367	4.66613	5.63517	5.47432	5.15433	5.98527	20.8842	20.2849	20.0095	0.0240623	0.0314452
229.051	C13H10O4	9285.98	297019	1	2.30397	2.47781	2.36455	0.197761	0.232954	41.3901	43.5945	42.1321	63.2372	64.8961	63.9863	40.6247	43.1516	32.7635	31.9834	31.0762	0.763272	0.825276
229.054	C10H14O4S	1403.18	232261	1	1.34129	1.39738	1.33005	0.609359	0.56984	0.048615	0.0556437	0.05991	0.244583	0.172782	0.195166	0	0	0	0	0	0.0193832	0.0189862
229.062	C12H10N2O3	1139.25	265590	1	0.161563	0.15257	0.151605	0.0140311	0.0373517	0.541512	0.597912	0.664548	16.0337	17.1236	15.3342	2.74808	3.08618	0.111471	0.134012	0.117867	0.136785	0.127459
229.072	C10H14O6	5018.97	298503	1	1.10444	1.16604	1.13249	1.4563	1.47406	11.4188	11.476	11.9738	13.0492	15.0397	13.9598	11.6849	12.2506	16.4037	15.6273	15.7293	0.406976	0.350366
229.087	C14H14O3	5777.52	296260	1	7.64024	7.56176	7.40318	2.02982	2.11554	25.1945	25.9201	26.0273	41.5106	44.3837	42.1091	30.6533	32.1164	15.5904	15.9315	16.0376	3.77828	3.67662
229.098	C13H14N2O2	730.264	282523	1	0.259191	0.264187	0.275006	0.121019	0.142649	0.214089	0.0955617	0.137058	7.48547	7.20686	6.43965	1.13322	1.57412	0	0	0	0.253298	0.278593
229.108	C11H18O5	2887.82	292440	1	0.455356	0.456844	0.462863	1.8785	1.92018	1.67756	1.76641	1.70315	2.40448	2.10497	2.35438	5.34497	5.81717	5.01129	5.17345	5.11265	0.0193583	0.0432948
229.123	C15H18O2	5910.1	296371	1	7.58966	7.84245	7.57307	3.16641	3.29302	9.2638	9.27336	9.90793	17.8924	18.4273	17.9823	13.2284	14.3407	5.71634	5.23415	5.90856	3.57193	3.45925
229.145	C12H22O4	132.606	287720	1	0	0	0	0.0701366	0.0815897	0	0	0	0	0	0	0.0604013	0.163253	0	0	0	0	0
229.16	C16H22O	1547.91	290953	1	1.97373	2.15915	1.88334	0.629701	0.667438	0.535358	0.471768	0.615403	0.91585	0.950835	1.34623	0.984267	0.914098	0.127913	0.138982	0.185441	0.590064	0.597388
229.181	C13H26O3	566.242	297509	1	0	0	0	0	0	0	0	0	0	0	0	3.66733	4.19703	0	0	0	0	0
230.01	C11H5NO5	383.742	286879	1	0	0	0	0	0	0.598405	0.555098	0.666076	5.08416	5.76788	5.00483	1.06427	1.21546	0.161164	0.0931392	0.124046	0	0
230.028	C12H9NO2S	34.2504	250661	1	0	0	0	0	0	0	0	0	0.495981	0.514805	0.44306	0.0963993	0.177112	0	0	0	0	0
230.046	C12H9NO4	1851.72	294547	1	0.2273	0.263092	0.216144	0.0152159	0.0102234	5.51545	5.48605	5.71472	26.4949	27.509	27.1291	9.0332	9.7573	1.64153	1.45452	1.47102	0.106623	0.127356
230.067	C9H13NO6	48.8038	278594	1	0	0	0	0	0	0	0.0676886	0.0803954	0.369919	0.438367	0.303032	0.158874	0.17952	0.115695	0.0679999	0.0596225	0.0175882	0.0120721
230.082	C13H13NO3	1699.21	296433	1	1.23721	1.35326	1.20393	0.416545	0.488492	3.68633	3.40633	3.70599	18.9126	20.4052	19.478	7.54295	8.57756	0.432093	0.451199	0.423018	1.25893	1.28358
230.094	C12H13N3O2	65.8196	263708	1	0.0143577	0.0136563	0.0231121	0.00695117	0.0053022	0	0	0	0.593818	0.696488	0.552989	0.0634544	0.0572387	0	0	0	0	0
230.119	C14H17NO2	1026.57	290492	1	0.717417	0.844901	0.709494	0.556598	0.636428	0.0760042	0.108351	0.191244	2.16202	2.57727	2.30638	0.5983	0.643888	0	0	0	0.573521	0.517836
230.994	C11H4O6	1334.38	292743	1	0	0	0	0	0	5.57048	5.86634	6.21421	5.78459	6.44632	6.0948	6.55219	6.78522	8.68582	9.22464	9.00768	0	0
230.997	C8H8O6S	227.482	284953	1	0	0	0	0	0	0.0757454	0.11464	0.0790662	1.21049	1.59077	1.46236	0.150196	0.27603	0.208594	0.151636	0.21624	0	0
231.012	C12H8O3S	150.076	270787	1	0	0	0	0	0	0.450043	0.505445	0.657124	0.962429	1.06516	1.25026	0.468902	0.492586	0.43922	0.387636	0.451968	0	0
231.015	C8H8O8	61.6554	257424	1	0	0	0	0	0	0.305986	0.263051	0.260909	0.128912	0.178615	0.140552	0	0	0.456265	0.259427	0.245799	0	0
231.03	C12H8O5	8148.13	295413	1	0.666721	0.759378	0.70952	0.023775	0.0282098	37.4085	38.2527	37.6414	52.1852	56.7798	54.675	32.9557	35.5324	39.1189	38.4362	37.4247	0.112019	0.0959961
231.041	C11H8N2O4	806.624	249666	1	0	0.0372292	0.0427287	0	0	0.281697	0.411106	0.384531	10.9158	12.1241	11.263	1.51813	1.49195	0.0832476	0.0710865	0.0688455	0.0278615	0.0199248
231.045	C16H8O2	128.094	272592	1	0	0	0	0	0	0.441963	0.398792	0.335397	1.09304	1.29909	1.61397	0.719519	0.949442	0.511982	0.571208	0.478935	0	0
231.051	C9H12O7	889.881	291610	1	0.0194821	0.0158643	0.0129417	0.011102	0.0147107	3.39182	3.59352	3.86788	3.4978	3.25723	3.517	2.46385	2.65148	6.5746	6.37798	6.94098	0.0259057	0.0244283
231.066	C13H12O4	9788.3	296671	1	5.29416	5.88938	5.42829	1.18057	1.31836	44.101	44.2709	45.5841	62.1723	64.1262	62.9203	50.6889	54.4331	38.2747	35.0915	34.745	2.79218	2.61936
231.078	C12H12N2O3	1220.03	279877	1	0.374849	0.447335	0.359446	0.111455	0.133778	0.712052	0.645711	0.525048	15.0405	14.485	15.8022	3.89359	4.21311	0.111871	0.084192	0.0747355	0.485836	0.504608
231.082	C17H12O	295.167	287762	1	0.078374	0.0851658	0.120988	0	0	1.45271	1.38571	1.32689	3.06224	3.37496	3.30029	1.05472	1.38355	0.350163	0.189686	0.227921	0	0
231.088	C10H16O6	1914.37	290061	1	0.0960909	0.0815653	0.109883	0.352762	0.35576	1.09186	1.07562	1.24266	2.1264	3.43268	2.88503	2.77464	3.01003	2.51404	2.54597	2.18917	0.0239671	0.0249305
231.103	C14H16O3	9225.34	296029	1	12.1514	12.5079	11.8211	5.52563	5.81758	24.0105	24.0805	25.0128	42.1946	42.9965	43.7153	34.1374	34.2409	20.8589	19.7023	19.924	6.02621	5.95242
231.114	C13H16N2O2	535.612	285315	1	0.225011	0.186521	0.217551	0.296852	0.298793	0.0712116	0.0512426	0.0624391	2.06006	2.30498	1.83343	0.267364	0.33973	0	0	0	0.274519	0.322109
231.124	C11H20O5	231.873	287251	1	0	0	0	0.0184966	0.0179795	0	0	0	0	0	0	0.162006	0.290154	0.077643	0.134814	0.0753795	0	0
231.139	C15H20O2	5814.29	295034	1	7.4913	7.74931	7.45029	3.62705	3.85482	7.61651	7.75606	7.69882	14.2341	15.6733	15.7646	11.7378	12.2827	5.27948	4.92305	4.77889	2.91154	2.87092
231.176	C16H24O	542.381	288337	1	0.715235	0.711823	0.694995	0.211659	0.211337	0.101197	0.177339	0.108542	0.280674	0.48536	0.317818	0.237594	0.347563	0.0848076	0	0.0604955	0.0624646	0.0897662
232.025	C11H7NO5	1201.89	295004	1	0	0.0239461	0.0118994	0	0	2.43177	2.73497	2.8356	15.8019	17.108	17.6085	4.10315	3.71219	1.04573	0.771627	0.689128	0	0
232.062	C12H11NO4	1843.63	296706	1	0.752048	0.855973	0.811309	0.153367	0.163426	6.11131	5.89339	6.12086	26.772	27.7109	26.276	12.0088	12.7494	1.95412	1.88015	2.19845	0.805916	0.708658
232.073	C11H11N3O3	180.221	240722	1	0.0287644	0.0179625	0.0284586	0	0	0	0	0	2.10483	2.08033	1.851	0.143496	0.194589	0	0	0	0.0340316	0.0236985
232.077	C16H11NO	159.034	279845	1	0	0.0144515	0.0135938	0	0	0.130401	0.081628	0.12869	2.1348	1.58261	1.67763	0.212497	0.20926	0	0	0	0	0
232.098	C13H15NO3	1838.47	293640	1	1.68815	1.76839	1.70146	1.17303	1.22463	1.63665	1.83081	1.71368	12.3376	14.7512	13.6034	6.21537	6.01787	0.203361	0.240079	0.2218	2.12055	2.08331
232.109	C12H15N3O2	36.9337	238580	1	0.0161052	0	0.0140993	0	0	0	0	0	0.256467	0.289998	0	0	0	0	0	0	0	0
232.134	C14H19NO2	833.501	288774	1	0.391753	0.376501	0.408165	0.517568	0.555208	0	0	0	0.666912	0.649157	0.621416	0.0943378	0.155329	0	0	0	0.200999	0.112324
232.976	C7H6O7S	183.818	284529	1	0	0	0	0	0	0.268425	0.362073	0.270109	2.1992	2.28581	2.69307	0.364915	0.362144	0.0680265	0.138793	0.0693401	0	0
232.992	C11H6O4S	40.1713	275225	1	0	0	0	0	0	0.0426801	0.0471965	0.0663198	0.307601	0.296173	0.219872	0.0784418	0.0593206	0	0	0	0	0
233.009	C11H6O6	4068.23	293392	1	0.0355855	0.0279426	0.0357154	0	0	17.5969	18.086	18.9457	27.3088	28.1344	27.8	15.0301	15.2678	22.9112	22.8666	23.2965	0	0
233.013	C8H10O6S	84.872	279762	1	0	0	0	0	0	0.0693454	0.0866323	0.0535544	0.591704	1.02693	0.942908	0	0	0	0	0	0	0
233.02	C10H6N2O5	142.181	256653	1	0	0	0	0	0	0.0501436	0.0636704	0.107985	1.86583	1.724	2.08306	0.193074	0.247571	0	0	0	0	0
233.025	C15H6O3	34.7009	262090	1	0	0	0	0	0	0.0754994	0.15115	0.0741969	0.52957	0.465817	0.4982	0.149384	0.224259	0.104247	0.0770761	0.107997	0	0
233.03	C8H10O8	55.1813	259935	1	0	0	0	0	0	0.228263	0.120921	0.244165	0	0.237629	0.198741	0	0	0.277196	0.436439	0.250628	0	0
233.046	C12H10O5	10676.9	295435	1	2.30653	2.60797	2.38694	0.270244	0.333187	49.1936	49.0266	49.7221	62.4988	62.5946	63.6292	52.164	56.056	64.18	60.6284	59.7742	1.07802	1.04183
233.049	C9H14O5S	866.624	251175	1	0.0220467	0	0.0194262	0.00956739	0.0141042	0	0	0	1.57232	2.19598	1.88187	0	0	0	0	0	0.023191	0.0155045
233.057	C11H10N2O4	1084.46	276800	1	0	0	0	0.0367569	0.0225522	0.774264	0.70739	0.948122	15.1951	15.4995	15.8881	4.14549	4.59119	0.322854	0.318793	0.455219	0.172076	0.231184
233.061	C16H10O2	1694.57	294481	1	0.242024	0.316452	0.229767	0	0	7.71206	7.77768	7.89159	16.0486	17.0039	17.0297	8.65821	9.24458	4.61794	4.10019	4.56505	0.0134627	0.0390941
233.067	C9H14O7	61.3121	273171	1	0	0	0	0	0	0.0624427	0.0693971	0.164982	0.289864	0.311408	0.345451	0.249328	0.124035	0.238183	0.15661	0.344573	0	0
233.072	C15H10N2O	136.828	270845	1	0	0	0	0	0	0	0	0	1.84221	1.56321	2.00464	0.188795	0.117363	0	0	0	0	0
233.082	C13H14O4	8956.82	294682	1	10.3063	11.0052	10.5834	4.55743	4.74534	41.5558	41.8619	41.7119	57.8842	59.421	58.2006	52.5223	56.2907	40.5807	38.8979	38.1937	5.60729	5.66165
233.093	C12H14N2O3	1024.85	287090	1	0.580354	0.626883	0.573421	0.449718	0.442998	0.413464	0.439495	0.502829	9.13884	9.78546	9.97915	2.91587	2.93167	0	0	0	0.809984	0.782073
233.097	C17H14O	276.208	287935	1	0.266387	0.284848	0.250433	0.00755826	0.00916969	1.29321	1.02983	1.19997	2.61016	2.0564	1.82736	1.03169	1.02446	0.128858	0.149808	0.148346	0.042878	0.0505456
233.103	C10H18O6	143.709	278206	1	0	0	0	0	0	0	0	0	0	0	0	0.0913409	0.082807	0	0.088913	0.0700644	0	0
233.118	C14H18O3	15811.6	292766	1	13.6444	13.9839	13.8853	10.2853	10.4538	21.6295	21.7818	21.349	38.8659	41.6158	41.1601	32.9039	34.2082	23.4273	23.822	22.8572	6.37895	6.30286
233.13	C13H18N2O2	308.685	286646	1	0.0659917	0.0793466	0.0683093	0.200797	0.180747	0	0	0	0.248824	0.158264	0.203684	0	0	0	0	0	0.151476	0.121799
233.155	C15H22O2	20481.3	294783	1	6.97224	6.73449	6.5448	13.1727	13.6429	10.3492	8.67517	8.36266	38.6365	34.085	30.1224	15.4916	15.9134	28.2835	22.5265	22.977	4.80618	3.91474
233.191	C16H26O	28.8322	282383	1	0.034458	0.0236734	0.0369449	0.0165342	0.0121477	0	0	0	0	0	0	0	0	0	0	0	0	0
234.005	C10H5NO6	194.146	283096	1	0	0	0	0	0	0.237908	0.209038	0.175954	2.50531	2.91813	2.57665	0.202079	0.251077	0	0.103733	0.0888927	0	0
234.041	C11H9NO5	1413.38	294034	1	0.102634	0.126753	0.14031	0.0128863	0.0133568	4.3739	4.31361	4.49982	18.8969	20.651	19.7806	8.96432	9.14353	2.82013	2.86593	2.56831	0.0935542	0.1256
234.052	C10H9N3O4	151.477	186056	1	0	0	0	0	0	0.0475036	0.0635682	0	2.31169	2.03631	2.0191	0.215439	0.225083	0	0	0	0	0
234.056	C15H9NO2	718.679	287691	1	0.0389769	0.0430943	0.0454327	0	0	0.91864	0.801474	0.846781	9.39702	10.6046	10.5292	1.92033	1.92194	0	0	0	0	0
234.077	C12H13NO4	1776.92	294753	1	1.4487	1.61275	1.46347	0.880497	0.956711	4.98215	5.31153	5.21207	22.9461	22.2908	22.0451	11.7914	13.0924	2.05369	1.53911	1.85794	1.84204	1.91557
234.089	C11H13N3O3	96.128	250204	1	0.034484	0.0264362	0.0222936	0.019211	0.0148177	0	0	0	1.07327	1.36309	1.1502	0.143906	0.135922	0	0	0	0	0
234.093	C16H13NO	82.8785	285052	1	0.0305231	0.0119069	0.014065	0	0	0.0504376	0.0661772	0.036746	1.02054	1.03848	0.885758	0.109475	0.198737	0	0	0	0	0
234.114	C13H17NO3	2499.67	290465	1	1.31157	1.39989	1.23681	1.53969	1.66507	0.437202	0.486897	0.465869	4.88195	5.55673	4.77636	2.61643	2.95379	0.120334	0.0648308	0.0655565	1.87077	1.8301
234.125	C12H17N3O2	12.3926	268834	1	0	0	0	0.00519055	0.00768981	0	0	0	0	0	0	0	0	0	0	0	0	0
234.15	C14H21NO2	247.032	281781	1	0.025095	0.0337435	0.0493452	0.1347	0.164552	0	0	0	0	0	0	0	0	0	0	0	0	0
234.989	C10H4O7	792.282	282297	1	0	0	0	0	0	3.41641	3.2408	3.68965	2.344	2.96765	2.39725	1.41079	1.56949	5.24659	5.704	5.55081	0	0
235.007	C11H8O4S	489.365	266599	1	0	0	0	0	0	0.250384	0.228946	0.260519	2.89363	3.27371	3.10842	0.267239	0.429791	0.193519	0.209566	0.21566	0	0
235.025	C11H8O6	7545.33	292641	1	0.321583	0.332149	0.321356	0.0110306	0.00702198	29.9627	31.4869	31.3162	36.4985	39.7261	37.5734	31.5177	31.9892	57.5238	57.7326	58.8528	0.0525974	0.0299993
235.028	C8H12O6S	686.47	251915	1	0	0	0	0	0	0	0	0	0.951194	1.51175	0.876417	0	0	0	0	0	0	0
235.036	C10H8N2O5	375.894	271438	1	0	0	0	0	0	0.249859	0.282745	0.255102	4.99797	5.43962	5.48888	0.839772	1.11166	0.124001	0.15521	0.133394	0.0221393	0.0285346
235.04	C15H8O3	2047.27	291903	1	0.0780225	0.0469165	0.0712227	0	0	8.41552	8.69228	9.53411	19.5397	19.6427	19.5526	10.9519	11.3273	8.75011	8.08211	8.12028	0	0
235.046	C8H12O8	18.7946	239405	1	0	0	0	0	0	0.0489445	0.0840959	0.0875263	0.117907	0.124087	0.155357	0	0	0.101491	0.0925265	0.100367	0	0
235.051	C14H8N2O2	526.647	253347	1	0.0223319	0.0197221	0	0	0	0	0	0	6.55779	7.91583	7.5994	0.582072	0.458268	0	0	0	0	0
235.061	C12H12O5	10283.4	293971	1	5.05319	5.48848	5.2189	1.82719	1.96267	46.6957	48.2771	46.5649	54.2497	57.8489	54.2949	55.4172	57.3152	65.4409	65.5211	62.2578	2.63753	2.70064
235.072	C11H12N2O4	968.837	284051	1	0.319743	0.339084	0.273366	0.1809	0.206287	0.763913	0.839305	0.607947	12.7245	14.5622	12.9113	4.41357	4.38335	0.418291	0.39604	0.221286	0.291235	0.421047
235.077	C16H12O2	2128.43	293806	1	0.990351	1.12253	1.06835	0.0442707	0.0489287	9.19776	9.55296	9.91211	17.1721	18.7525	17.0384	9.69709	10.145	4.36703	4.49045	4.60709	0.236332	0.213614
235.098	C13H16O4	20016.3	294569	1	13.3615	15.1058	13.7128	12.4554	13.3331	37.2169	36.5226	37.4788	52.7339	53.859	52.6893	51.3151	54.6633	43.3948	41.0709	39.4498	7.72734	7.37665
235.109	C12H16N2O3	835.908	281256	1	0.346126	0.313711	0.388226	0.543751	0.554684	0.0380506	0.0507293	0.0769994	2.40482	2.30706	2.73238	0.601875	0.536568	0	0	0	0.514224	0.591679
235.113	C17H16O	567.61	286758	1	0.636858	0.755684	0.660592	0.040589	0.0568939	0.827621	0.904119	0.719495	1.16827	1.17514	1.28769	0.772805	0.728031	0.099743	0.120484	0.0910834	0.154869	0.17261
235.134	C14H20O3	14312.3	294740	1	8.15026	8.62683	8.11833	9.14142	9.53363	12.7706	13.3571	13.5789	27.2806	27.4807	26.6209	20.9478	22.0681	17.4925	16.5404	16.9981	3.28146	3.14193
235.145	C13H20N2O2	38.4481	277515	1	0	0	0	0.0218145	0.0256109	0	0	0	0	0	0	0	0	0	0	0	0	0
235.17	C15H24O2	920.254	287671	1	0.76905	0.81968	0.662928	0.598616	0.531124	0.237834	0.308446	0.201197	0.716128	0.83129	1.08176	1.14434	1.05702	0.207129	0.393122	0.485367	0.0505127	0.045828
236.02	C10H7NO6	691.16	282988	1	0	0	0	0	0	0.656711	0.865718	0.79957	5.74707	6.23697	5.62155	1.45994	1.48898	0.57926	0.46132	0.387425	0	0
236.035	C14H7NO3	584.387	276632	1	0	0	0	0	0	0.531854	0.58607	0.567037	7.85091	8.7837	7.75551	1.51052	1.64949	0.107978	0.093138	0.0610916	0	0
236.039	C11H11NO3S	48.5215	240585	1	0	0	0	0	0	0	0	0	0.245955	0.511338	0.411427	0.136567	0.184661	0	0	0	0	0
236.047	C13H7N3O2	128.941	185946	1	0	0	0	0	0	0	0	0	1.96776	1.78399	1.35376	0.0633001	0.057278	0	0	0	0	0
236.057	C11H11NO5	1470.94	294028	1	0.49081	0.461951	0.460739	0.139796	0.155482	4.21522	4.71147	4.86126	19.4993	20.026	20.3493	10.9792	10.9028	3.49588	3.33925	3.16913	0.629914	0.57604
236.068	C10H11N3O4	107.81	206845	1	0	0.0175609	0.0159645	0	0	0	0	0	1.10655	1.62045	1.15722	0.163312	0.187493	0	0	0	0	0
236.072	C15H11NO2	667.902	284229	1	0.096887	0.122191	0.0789289	0	0	1.30027	1.23802	1.31058	8.95611	10.039	9.42143	1.96142	1.90726	0	0	0	0.0146221	0.0269052
236.093	C12H15NO4	3428.53	292912	1	1.3775	1.56048	1.35132	2.11593	2.2838	2.57136	2.46789	2.4607	12.0718	12.9435	13.3741	7.69533	8.21798	0.689011	0.622146	0.607055	2.03021	2.03758
236.104	C11H15N3O3	68.4151	263770	1	0.0164456	0.0216996	0.0149511	0.0327587	0.0422727	0	0	0	0.457655	0.302272	0.382901	0	0	0	0	0	0	0
236.108	C16H15NO	91.9098	286121	1	0.0563805	0.0583013	0.0491519	0	0	0	0	0	0.283441	0.351828	0.47144	0	0	0	0	0	0	0
236.129	C13H19NO3	1597.36	287069	1	0.374427	0.393348	0.380629	1.00515	1.06403	0	0	0	0.556795	0.459389	0.406728	2.12723	2.17928	0	0	0	0.390488	0.29924
236.986	C10H6O5S	92.7623	267868	1	0	0	0	0	0	0	0.0412846	0.0600362	0.437914	0.410934	0.348656	0.0731144	0.111274	0.0737864	0.0659561	0.0878516	0	0
237.004	C10H6O7	2128.19	286673	1	0	0	0	0	0	9.21849	9.28906	9.50878	6.35239	7.1408	6.47229	7.91532	8.26272	17.3853	16.8322	16.3388	0	0
237.008	C7H10O7S	41.8634	260381	1	0	0	0	0	0	0	0	0	0.213908	0.368498	0.613331	0.067263	0.0603938	0	0	0	0	0
237.019	C14H6O4	621.915	287675	1	0	0	0	0	0	2.61899	2.91968	2.68259	5.77369	6.56579	6.40216	3.87532	4.32299	3.53521	3.66226	3.49438	0	0
237.023	C11H10O4S	628.922	263543	1	0.0289873	0.0234582	0.0399586	0	0	0.428677	0.409311	0.37055	0.854539	1.53747	0.781317	0.478061	0.74501	0.39905	0.367084	0.24937	0	0
237.031	C13H6N2O3	132.772	221587	1	0	0	0	0	0	0	0	0	2.02623	1.9333	1.75158	0	0	0	0	0	0	0
237.041	C11H10O6	10086.8	293275	1	1.18816	1.25845	1.19269	0.165939	0.203586	31.3901	32.0225	33.7111	36.855	39.8961	39.6735	39.3047	40.0924	77.0955	76.2168	78.6762	0.416814	0.378991
237.052	C10H10N2O5	417.574	273124	1	0.0435116	0.0518034	0.0155893	0	0	0	0.439382	0.408243	6.37258	5.6815	6.09834	1.47569	2.03043	0.303506	0.394647	0.324029	0.0392158	0.0614314
237.056	C15H10O3	3850.09	292333	1	0.838295	0.941391	0.795219	0.0272083	0.0272984	16.7069	17.0156	17.9298	32.5114	32.31	31.7134	17.7548	19.2418	12.4554	12.5734	11.4899	0.165187	0.107114
237.067	C14H10N2O2	502.237	252553	1	0.0472917	0.0333658	0.038748	0	0	0.170386	0.284966	0.214749	6.33807	7.54893	6.79208	0.706925	0.70542	0	0	0	0	0
237.077	C12H14O5	12146.7	293104	1	7.98453	8.94115	8.14385	7.46653	8.09108	43.6256	43.8535	44.5889	50.2674	49.7781	50.8812	52.3783	56.5453	60.0204	56.7109	54.9678	4.22461	3.96772
237.088	C11H14N2O4	1001.07	282201	1	0.225078	0.31236	0.277912	0.624018	0.666825	0.283369	0.252289	0.304713	6.52326	7.97483	7.19871	2.29163	2.24643	0.151762	0.183865	0.158237	0.332359	0.320817
237.092	C16H14O2	1822.75	292914	1	2.18303	2.37273	2.24727	0.303528	0.392618	8.28584	8.16111	8.41492	13.7785	14.8705	13.5732	8.62563	8.92454	2.70098	2.46357	2.72054	0.928488	0.935049
237.103	C15H14N2O	55.9229	279718	1	0	0	0	0	0	0	0	0	0.381949	0.416908	0.283582	0	0	0	0	0	0	0
237.113	C13H18O4	30445.1	292746	1	10.9631	11.2101	11.1093	19.8043	19.9603	27.6248	27.8106	27.2099	38.2341	40.3341	39.7904	36.0085	38.3824	33.8929	33.083	32.2978	5.32873	5.14
237.125	C12H18N2O3	241.813	273309	1	0.0341798	0.054907	0.034375	0.157297	0.145203	0	0	0	0.147223	0.193515	0.22658	0	0	0	0	0	0.0346382	0.0772734
237.129	C17H18O	890.862	286290	1	1.08374	1.12899	1.14153	0.139606	0.153926	0.661638	0.556848	0.665851	0.893085	1.16127	1.00791	0.560766	0.537652	0.0969619	0.158607	0.136001	0.343757	0.30638
237.15	C14H22O3	4275.54	291379	1	2.54595	2.44226	2.42214	2.7812	2.79424	2.79667	2.57753	2.81463	7.65715	7.76918	7.88341	6.53613	6.56376	4.5148	4.2978	4.48877	0.421688	0.380711
238.036	C10H9NO6	1063.45	288607	1	0.0268335	0.0210134	0.0335555	0	0	1.10489	1.29615	1.41824	6.90793	7.70842	7.9152	3.58755	3.68948	1.97215	1.97487	1.74891	0.0189928	0.0214672
238.047	C9H9N3O5	45.3663	164851	1	0	0	0	0	0	0	0	0	0.40897	0.631665	0.664651	0	0	0	0	0	0	0
238.051	C14H9NO3	1138.74	287124	1	0.052244	0.0721192	0.0554045	0	0	2.35573	2.2716	2.27292	16.0862	16.7679	16.6834	3.58836	4.26454	0.201044	0.209326	0.320759	0.0159509	0.0234095
238.062	C13H9N3O2	105.002	181029	1	0	0	0	0	0	0	0	0	1.37705	1.38867	1.53835	0	0	0	0	0	0	0
238.072	C11H13NO5	1580.21	293602	1	0.602644	0.732227	0.708104	1.02637	1.04427	3.81588	3.65818	3.94541	14.4498	14.3304	14.21	9.01659	10.1537	2.11792	2.18788	2.21755	0.937202	0.779952
238.083	C10H13N3O4	61.9335	231598	1	0	0	0	0	0	0	0	0	0.386517	0.83837	0.602741	0	0	0	0	0	0	0
238.087	C15H13NO2	695.192	287170	1	0.304199	0.240683	0.287716	0.0248911	0.029365	0.723985	0.821224	0.654011	6.95753	7.27206	7.63053	1.19351	1.61313	0	0	0	0.0791199	0.144659
238.099	C14H13N3O	14.2235	177750	1	0	0	0	0	0	0	0	0	0.14229	0.138239	0.208385	0	0	0	0	0	0	0
238.109	C12H17NO4	3446.49	286045	1	0.660125	0.680099	0.633246	2.06208	2.29576	0.199746	0.283302	0.281739	1.86627	2.94326	2.54344	1.77342	2.45678	0.0759804	0	0.0800643	0.659603	0.72634
238.145	C13H21NO3	140.573	278609	1	0	0.0120746	0.0120687	0.0583856	0.0936377	0	0	0	0	0	0	0	0	0	0	0	0	0
239.002	C10H8O5S	790.312	279186	1	0	0	0	0	0	0.1919	0.143003	0.142172	0.892516	0.726328	0.6668	0.212519	0.233138	0.267131	0.0895775	0.110727	0	0
239.02	C10H8O7	4696.13	290199	1	0.0428398	0.0258426	0.0149967	0	0	12.4405	12.4899	12.6971	13.0313	13.4878	13.1751	15.4738	15.4812	35.3868	35.9419	36.4077	0	0
239.031	C9H8N2O6	61.143	259143	1	0	0	0	0	0	0.120745	0.103444	0.181371	0.865496	0.919017	0.670345	0.259109	0.305016	0.15075	0.0800163	0.120177	0	0
239.035	C14H8O4	3818.39	289412	1	0.149613	0.204397	0.177514	0	0	16.9551	17.3366	17.7822	32.2063	32.2195	32.9442	17.9788	19.6807	17.1226	16.5037	15.5759	0.0263312	0.0148831
239.038	C11H12O4S	3316.7	255473	1	4.23557	4.62641	4.16448	0	0	0.264598	0.416136	0.414555	0.638049	1.11548	0.908521	0.452288	0.462085	0.164859	0.14716	0.15619	0.0160689	0.0135036
239.046	C13H8N2O3	502.937	250029	1	0.0145314	0.0108486	0.0104626	0	0	0	0	0	7.58805	7.45914	7.36841	0.937241	1.11247	0	0	0	0	0
239.056	C11H12O6	7714.73	292515	1	2.66283	3.05203	2.75843	1.51505	1.65688	34.7956	34.8864	35.9275	32.0853	31.4831	32.1558	33.7211	34.885	61.5764	58.2342	57.1411	1.25519	1.23227
239.067	C10H12N2O5	353.583	273336	1	0.0585148	0.0604832	0.0404046	0.0500633	0.0563518	0.395235	0.452951	0.639454	3.93991	5.31457	4.30147	2.02561	2.10304	0.245277	0.288169	0.283604	0.0830194	0.0840609
239.071	C15H12O3	4491.11	290849	1	2.44466	2.63059	2.54799	0.279163	0.297707	20.9164	20.8467	20.9151	32.6715	32.7621	33.3301	20.3468	22.1853	12.2144	11.2226	11.4749	1.10594	1.14256
239.083	C14H12N2O2	555.37	261409	1	0.124756	0.12596	0.103111	0	0	0.157787	0.230898	0.137522	6.548	6.51685	7.24736	0.863009	0.953994	0	0	0	0.0340013	0.0561746
239.093	C12H16O5	28949.5	291879	1	8.43768	9.32303	8.65065	17.6843	19.2837	36.7186	36.5615	37.203	37.9016	39.5828	38.7493	40.326	43.6984	45.3003	42.5995	42.0605	3.54394	3.44814
239.104	C11H16N2O4	920.202	276283	1	0.0822818	0.0863042	0.0759688	0.534541	0.612961	0.072008	0.0460313	0.07578	1.25672	1.08892	1.21152	0.399287	0.329853	0	0	0	0.0851597	0.085131
239.108	C16H16O2	2667.45	291154	1	3.20507	3.6528	3.33514	0.73207	0.822156	6.94762	6.99225	7.04155	11.1473	11.6862	11.4473	8.04906	8.20571	2.39433	2.48528	2.32416	1.82652	1.70358
239.119	C15H16N2O	41.0719	261769	1	0.0121229	0.0120115	0	0	0	0	0	0	0.160751	0.173013	0	0	0	0	0	0	0	0
239.129	C13H20O4	13128.8	292870	1	3.93989	4.31058	4.06238	8.01556	8.74529	9.55435	9.47461	9.64594	17.2966	17.3679	16.5072	15.9106	17.1409	16.0605	15.0314	15.0208	1.49129	1.49775
239.144	C17H20O	1218.21	285575	1	1.41801	1.63488	1.56099	0.282108	0.295624	0.534511	0.549502	0.516069	0.753386	0.861909	0.592839	0.605086	0.625353	0.121174	0.0898335	0.100934	0.546411	0.60296
239.165	C14H24O3	319.65	279899	1	0.0525964	0.0568387	0.0543889	0.077117	0.0733878	0	0	0	0	0	0	0.220636	0.158577	0	0	0	0	0
240.03	C13H7NO4	931.162	282433	1	0	0	0	0	0	1.1656	1.27906	1.41971	12.0684	12.6932	13.6422	2.40014	3.03134	0.13577	0.0741556	0.178463	0	0
240.042	C12H7N3O3	154.324	147821	1	0.157619	0.215264	0.167328	0	0	0	0	0	0.842157	0.783197	0.938783	0	0	0	0	0	0	0
240.051	C10H11NO6	955.84	287925	1	0.039809	0.0428337	0.0375862	0.0232449	0.0233306	1.75873	2.13172	2.14249	6.11989	6.73569	7.09987	4.04422	4.67938	2.04702	1.76959	1.76185	0.122097	0.0893431
240.063	C9H11N3O5	29.9642	179201	1	0	0	0	0	0	0	0	0	0.325218	0.339183	0.438998	0.0854692	0.130189	0	0	0	0	0
240.067	C14H11NO3	1377.54	288741	1	0.406399	0.406884	0.333639	0.0240091	0.0340124	3.18851	3.27488	3.43678	20.2815	20.6311	20.182	6.28343	6.69322	0.323371	0.252511	0.425194	0.23233	0.182312
240.078	C13H11N3O2	100.494	189764	1	0.109335	0.0907017	0.107646	0	0	0	0	0	1.27635	1.00055	1.318	0	0	0	0	0	0	0
240.088	C11H15NO5	2725.62	287366	1	0.446928	0.538428	0.420938	1.73345	1.81558	0.770899	0.8728	0.972252	4.67325	4.51473	4.7319	3.69667	4.38188	0.382576	0.395797	0.340408	0.396959	0.374399
240.099	C10H15N3O4	22.5973	261293	1	0	0	0	0.0146993	0.00787504	0	0	0	0.138904	0.175861	0	0	0	0	0	0	0	0
240.103	C15H15NO2	656.971	285438	1	0.368143	0.397062	0.376522	0.0729227	0.0587964	0.380733	0.269256	0.227525	3.26833	3.97384	3.98989	0.940251	1.10973	0	0	0	0.241951	0.176904
240.124	C12H19NO4	1158.61	278804	1	0.0467377	0.0435683	0.0556388	0.728413	0.771768	0	0	0	0	0	0	0.128691	0.189325	0	0	0	0.0276734	0.0240193
240.999	C9H6O8	142.542	268207	1	0	0	0	0	0	0.448964	0.458325	0.540339	0.217422	0.384812	0.194028	0.107244	0.0861868	1.10823	1.01294	0.803643	0	0
241.014	C13H6O5	1859.15	287811	1	0	0	0	0	0	8.04387	7.87796	8.65805	16.0054	16.9482	16.3849	8.99081	9.90247	9.69779	9.9008	9.13929	0	0
241.018	C10H10O5S	2426.12	271131	1	0.0650024	0.0687093	0.0531335	0	0	0.239232	0.298961	0.185831	1.19233	0.890999	1.24972	0.369525	0.340215	0.170665	0.117968	0.19307	0.0167961	0.0250175
241.035	C10H10O7	4284.92	288961	1	0.166143	0.142095	0.0978068	0.0141681	0.0147903	14.3844	14.9897	15.4658	11.4686	12.0018	12.2395	11.2717	10.7799	32.1409	31.9086	33.4219	0.0744866	0.0469985
241.051	C14H10O4	7107.2	289492	1	1.53192	1.65238	1.54683	0.11016	0.0999365	31.3201	31.5346	33.0982	53.5494	52.1182	52.8548	32.9915	35.1401	23.5046	22.2837	22.7781	0.460211	0.425075
241.054	C11H14O4S	1711.89	245247	1	0.451996	0.543799	0.439285	0.0123141	0.0179378	0.0659363	0.0839865	0.133889	0.220008	0.525668	0.469883	0.287959	0.192491	0.0879757	0.0807625	0.13121	0.0123411	0.0427433
241.062	C13H10N2O3	973.445	253806	1	0.125867	0.112478	0.113522	0	0	0.514798	0.5885	0.601336	14.3316	14.4436	14.2617	2.36552	2.43894	0.146128	0.135647	0.0964749	0.0940844	0.131774
241.072	C11H14O6	8205.15	290022	1	3.66193	3.95826	3.79761	5.33737	5.39429	30.3138	31.8153	31.063	26.4251	27.3898	26.3607	27.1296	27.1996	40.0504	40.6364	39.231	1.36276	1.45699
241.083	C10H14N2O5	130.987	262918	1	0.028434	0.0232439	0.022765	0.0520527	0.0413363	0.241449	0.168202	0.320554	1.14072	1.18939	1.30181	0.437239	0.494586	0	0	0	0	0
241.087	C15H14O3	4110.21	287693	1	4.62787	4.74378	4.65089	0.918633	0.996357	18.0493	18.5984	19.1412	31.3073	31.5626	31.59	20.9461	22.8815	10.348	9.89432	10.2775	2.30504	2.28687
241.09	C12H18O3S	968.567	248025	1	0.224796	0.268551	0.25893	0	0	0	0	0	0	0	0	0.126227	0.16883	0	0	0	0	0
241.098	C14H14N2O2	589.49	273617	1	0.154439	0.161388	0.13381	0.0214815	0.0262823	0.114161	0.113639	0.156543	4.65081	4.64663	4.4999	0.613301	0.665529	0	0	0	0.111891	0.153043
241.108	C12H18O5	21401.1	290958	1	4.26586	4.48745	4.17368	13.4183	14.2556	15.1506	14.6226	14.6544	17.9145	19.5524	19.4626	20.6506	21.4374	22.706	21.9134	20.7829	0.985782	1.0377
241.119	C11H18N2O4	143.055	259325	1	0	0	0	0.0772591	0.0952914	0	0	0	0	0	0	0	0	0	0	0	0	0
241.123	C16H18O2	4215.53	289774	1	5.25827	5.51082	5.13482	1.59289	1.66702	6.45847	6.78118	6.61597	11.5913	11.8615	11.0732	8.14877	8.63777	2.85762	2.87816	2.94132	2.56422	2.45763
241.145	C13H22O4	1486.63	283973	1	0.315395	0.310855	0.282426	0.967038	0.963758	0.200951	0.167207	0.177293	1.04442	0.900265	1.04857	1.60743	1.75667	1.31901	1.30039	1.59186	0.0350682	0.0338052
241.16	C17H22O	1287.67	283119	1	1.60405	1.79615	1.62988	0.368757	0.397912	0.389129	0.303275	0.420766	0.431015	0.844925	0.437618	0.452517	0.688807	0.0842989	0.0618216	0.139168	0.551663	0.496641
242.01	C12H5NO5	98.2742	266744	1	0	0	0	0	0	0.0571691	0	0.0657612	1.20079	1.414	1.43979	0.310693	0.253562	0	0	0	0	0
242.028	C13H9NO2S	50.0363	250844	1	0	0	0	0	0	0	0	0	0.547453	0.752077	0.558874	0.079295	0.137971	0	0	0	0	0
242.031	C9H9NO7	85.1517	244775	1	0	0	0	0	0	0.0805832	0.076646	0.108591	0.553774	0.350368	0.288996	0.198187	0.199411	0.239728	0.155243	0.0840102	0	0
242.046	C13H9NO4	1640.22	285960	1	0.135153	0.133043	0.145909	0	0	4.28217	4.39222	4.6813	23.8126	24.6535	23.9328	7.62288	8.23274	0.723868	0.865878	0.815063	0.0617108	0.0603971
242.057	C12H9N3O3	233.194	161700	1	0.0297595	0.0121109	0	0	0	0	0	0	2.83279	3.00676	3.41647	0.110882	0.0772949	0	0	0	0.0150656	0.0164918
242.067	C10H13NO6	459.646	281266	1	0.0357026	0.0459106	0.0317547	0.103195	0.0937191	0.51663	0.615426	0.828986	2.4246	3.13067	2.28719	1.54565	1.94928	0.472666	0.443664	0.545527	0.0541996	0.0552785
242.082	C14H13NO3	1550.35	287606	1	0.872002	0.948857	0.925155	0.117951	0.180489	2.32227	2.57593	2.84918	17.4172	17.217	17.1764	6.09944	5.83829	0.430746	0.182285	0.221353	0.581341	0.529871
242.094	C13H13N3O2	80.9053	209295	1	0.0305875	0.0286738	0.0154626	0	0	0	0	0	0.66149	0.543774	0.883273	0	0	0	0	0	0.0120385	0.014446
242.103	C11H17NO5	1636.74	275358	1	0.0553304	0.0496232	0.0437539	1.06468	1.08478	0	0	0	0	0.292291	0.357364	0.272123	0.392887	0	0	0	0.0185271	0.0143079
242.119	C15H17NO2	816.541	282497	1	0.488852	0.550759	0.471869	0.19738	0.202541	0.0961303	0.119757	0.0916055	1.27817	1.80265	1.86489	0.482378	0.303142	0	0	0	0.239348	0.284638
242.176	C13H25NO3	145.976	288807	1	0	0	0	0	0	0	0	0	0	0	0	0.107086	0.188064	0	0	0	0	0
242.997	C9H8O6S	345.609	271913	1	0	0	0	0	0	0.0980678	0.146013	0.190635	0.487484	0.566247	0.775099	0.150567	0.0729258	0.121793	0.18315	0.127604	0	0
243.012	C13H8O3S	112.599	263321	1	0	0	0	0	0	0.39536	0.353093	0.506572	1.04944	0.898512	0.869497	0.293185	0.550621	0.235068	0.41166	0.174038	0	0
243.03	C13H8O5	6847.93	287431	1	0.354469	0.434822	0.354607	0	0	29.0273	29.7189	31.8908	46.4586	47.9898	49.1883	30.186	30.4341	29.016	29.1078	29.4791	0.0503623	0.0521164
243.033	C10H12O5S	4108.58	263364	1	0.469888	0.530612	0.420967	0.0550251	0.0666446	0.0922947	0.105312	0.172578	0.700414	0.526299	0.44047	0.591984	0.509518	0.099186	0.141964	0.0919517	0	0
243.041	C12H8N2O4	740.606	265869	1	0.0268417	0.0361554	0.0272095	0	0	0	0	0	9.46137	11.0325	10.8504	1.43352	1.56865	0	0	0	0.0321675	0.0508921
243.045	C17H8O2	120.872	249279	1	0	0	0	0	0	0.372352	0.335938	0.442516	1.0217	1.1688	0.927954	0.916744	0.88805	0.095026	0.136089	0.163702	0	0
243.051	C10H12O7	3387.88	286131	1	0.279792	0.409397	0.312625	0.265506	0.280649	14.7403	15.0538	15.7773	11.1198	11.0485	10.6924	9.27572	9.29585	26.0175	24.6503	24.8701	0.107939	0.101829
243.066	C14H12O4	7459.92	288623	1	3.66433	3.87387	3.67061	0.579633	0.619865	35.0598	35.0218	34.7148	50.6429	54.5633	53.8643	36.9872	40.2218	26.1445	24.8888	23.8999	1.65484	1.60622
243.07	C11H16O4S	930.327	235280	1	0.0472883	0.0553446	0.0573801	0.0526699	0.0728288	0	0	0	0	0	0	0.0871476	0.136111	0	0	0	0	0
243.078	C13H12N2O3	1108.8	273087	1	0.294926	0.282201	0.340307	0.0391895	0.0318426	0.50275	0.610812	0.429677	14.1212	15.7244	14.6928	3.08365	2.98049	0.074375	0.132554	0	0.254553	0.226265
243.087	C11H16O6	7650.83	288278	1	2.25411	2.30315	2.27818	4.9768	5.03314	14.3104	14.7313	14.8129	13.1555	15.3616	13.906	16.2738	16.7869	20.2586	20.1409	19.6406	0.3645	0.383265
243.103	C15H16O3	6331.77	287821	1	8.0763	8.62703	8.11339	2.57345	2.6069	16.5654	17.2468	17.5121	30.829	30.0888	30.5934	22.6076	24.099	11.752	10.8764	10.9364	4.13413	4.00124
243.114	C14H16N2O2	522.347	272838	1	0.231142	0.239664	0.18549	0.0915695	0.106433	0.0740053	0.0554243	0.0969916	1.94516	2.00859	2.39409	0.41134	0.36733	0	0	0	0.180231	0.194215
243.124	C12H20O5	2673.1	280570	1	0.383694	0.371995	0.403789	1.64524	1.78059	0.533023	0.448588	0.366611	1.08266	1.08765	1.40436	2.99134	3.43735	3.09664	2.7134	2.5005	0	0
243.139	C16H20O2	4900.66	288607	1	6.17239	6.58363	6.2796	2.17621	2.37621	5.79817	6.00818	5.83683	10.4421	11.0025	11.1536	8.80438	8.8863	3.77665	3.06121	3.3621	2.80831	2.72695
243.171	C12H24N2O3	18.1289	284454	1	0	0	0	0	0	0	0	0	0	0	0	0	0	0.0877174	0.143385	0	0	0
243.176	C17H24O	801.326	281513	1	1.09906	1.03014	1.0268	0.164263	0.156028	0.172755	0.123341	0.10808	0.28792	0.289933	0.378831	0.252478	0.417536	0.0787596	0.0820637	0	0.204692	0.145993
244.025	C12H7NO5	925.877	284599	1	0	0.0148313	0.0103924	0	0	1.83735	2.17812	2.1292	12.2919	13.9165	13.2333	3.4853	3.94028	0.298629	0.586375	0.341642	0	0
244.036	C11H7N3O4	171.765	160084	1	0	0	0	0	0	0	0	0	1.09687	1.1379	1.13117	0	0	0	0	0	0	0
244.046	C9H11NO7	18.6086	246478	1	0	0	0	0	0	0	0	0	0.200449	0.168456	0.252549	0	0	0	0	0	0	0
244.062	C13H11NO4	1856.04	287689	1	0.584356	0.562699	0.56235	0.0515348	0.0786049	4.86425	5.15673	5.59295	26.3232	26.8653	27.1923	10.1872	10.7662	1.3464	1.45987	1.28529	0.374889	0.424108
244.073	C12H11N3O3	222.639	185715	1	0.0337547	0.035407	0.0192018	0	0	0	0	0	3.13101	3.3464	2.89991	0.202667	0.185374	0	0	0	0.0167833	0.0188008
244.083	C10H15NO6	161.676	253184	1	0	0	0	0.0238565	0.0304598	0	0	0	0.391857	0.448354	0.540462	0.151367	0.114137	0	0	0	0.0197477	0.0226063
244.098	C14H15NO3	1585.84	286698	1	1.3479	1.47016	1.35929	0.587991	0.671764	1.47083	1.25735	1.54849	11.4735	11.5499	11.7631	4.51485	4.4805	0.160544	0	0.124918	1.28001	1.38215
244.109	C13H15N3O2	30.8994	222279	1	0	0	0	0.00614179	0.0073474	0	0	0	0.210716	0.231879	0.18001	0	0	0	0	0	0	0
244.134	C15H19NO2	598.373	277771	1	0.377736	0.431294	0.368067	0.293438	0.296081	0	0	0	0.523363	0.64357	0.414804	0.0748351	0.126679	0	0	0	0.166198	0.148
244.991	C12H6O4S	37.2465	258151	1	0	0	0	0	0	0.0580656	0.0446479	0	0.266757	0.277489	0.420261	0	0	0	0	0	0	0
245.009	C12H6O6	3270.29	281749	1	0	0.02303	0.0130557	0	0	14.9799	14.9463	15.2297	21.2643	21.6076	21.2643	13.1966	14.2306	20.561	19.5387	18.8812	0	0
245.013	C9H10O6S	376.116	274953	1	0	0	0	0	0	0.10323	0.131868	0.124674	1.2624	1.47137	1.51529	0.279758	0.117844	0.114413	0.145708	0.083957	0	0
245.03	C9H10O8	1872.3	279471	1	0	0	0	0	0	2.5187	2.57722	2.81644	1.08999	1.42478	1.14423	0.438927	0.519877	15.6682	14.8084	14.076	0	0
245.046	C13H10O5	9193.11	287289	1	1.72495	1.83421	1.7279	0.136933	0.131309	40.3071	42.7239	42.8123	59.4079	62.9249	62.7556	44.4495	45.4868	43.8124	43.3853	43.6222	0.541347	0.464184
245.049	C10H14O5S	632.838	260779	1	0.063991	0.0783055	0.0781899	0.0254863	0.0300333	0.0844865	0.0994761	0.0864325	0.939678	0.780592	0.766007	0.315034	0.252638	0	0	0	0	0
245.057	C12H10N2O4	1156.64	262779	1	0.129561	0.124291	0.153201	0.0138374	0.0179018	0.661393	0.64613	0.784104	16.2014	17.385	16.2485	3.24124	3.64947	0.253107	0.232613	0.280215	0.172518	0.126759
245.061	C17H10O2	1009.36	285625	1	0.0620588	0.0564484	0.0891506	0	0	4.49517	4.70505	4.7006	10.7835	11.0641	10.5974	5.27137	5.71619	1.94629	1.98383	1.61613	0	0
245.067	C10H14O7	1800.79	287023	1	0.102549	0.122629	0.0818397	0.166366	0.175088	4.659	5.19461	5.51381	4.65843	5.13266	5.0657	3.8252	4.02997	8.0535	7.903	8.17854	0.0326821	0.0681621
245.082	C14H14O4	7090.19	287712	1	7.71297	8.33751	7.6189	2.35021	2.48291	32.3531	32.0252	33.019	51.3543	50.8142	50.473	40.4267	44.3428	26.1975	26.0083	25.2771	4.0491	4.06062
245.093	C13H14N2O3	1167.32	276508	1	0.624366	0.584981	0.617007	0.268815	0.284556	0.463407	0.381091	0.367851	13.02	12.5274	13.2267	3.05582	3.37627	0.066189	0.160862	0.065893	0.81732	0.762356
245.103	C11H18O6	2082.74	282858	1	0.174104	0.161573	0.139563	0.856791	0.894058	0.611428	0.683215	0.547627	1.20199	1.4541	1.37794	2.94114	2.94613	2.85932	2.69898	2.94187	0	0
245.118	C15H18O3	9203.26	286836	1	11.6436	12.518	11.7928	5.24824	5.6841	16.5723	16.471	16.0138	30.7724	30.6883	29.7926	23.9318	25.8196	13.8198	13.5751	13.0545	5.76792	5.64567
245.13	C14H18N2O2	265.13	274110	1	0.0952932	0.111685	0.108663	0.13187	0.161529	0	0	0	0.38813	0.374709	0.579214	0	0	0	0	0	0.191129	0.228029
245.155	C16H22O2	3904.03	286144	1	4.95448	4.96317	5.00254	1.89485	1.93132	3.27683	3.78202	3.49296	7.77326	7.58283	8.34169	6.32494	5.96768	2.30931	2.37973	2.14474	1.84932	1.67474
245.191	C17H26O	120.616	278933	1	0.140438	0.144903	0.154555	0.0146224	0.0147568	0	0	0	0	0	0	0	0	0	0	0	0	0
246.005	C11H5NO6	107.317	269317	1	0	0	0	0	0	0.105648	0.178153	0.155865	1.51391	1.57685	1.57227	0.179861	0.366466	0	0.0641265	0.0888067	0	0
246.023	C12H9NO3S	51.1451	242509	1	0	0	0	0	0	0	0	0	0.639317	0.768742	0.428302	0.240225	0.120917	0	0	0	0	0
246.041	C12H9NO5	1575.65	287068	1	0.088087	0.0721008	0.0888748	0	0	4.21376	4.70988	4.78633	22.48	22.0023	23.0845	8.10157	8.33238	2.26969	1.86592	2.28225	0.0654075	0.0965055
246.052	C11H9N3O4	217.128	160182	1	0	0	0	0	0	0	0	0	2.53973	3.26356	3.11169	0.154887	0.149315	0	0	0	0	0
246.056	C16H9NO2	326.443	266208	1	0.016449	0	0.0110169	0	0	0.213166	0.231123	0.319423	3.90475	4.17452	4.78264	0.645344	0.516671	0	0	0	0	0
246.077	C13H13NO4	1860.84	287291	1	1.23721	1.30355	1.24274	0.515359	0.482748	4.27182	4.33424	4.5292	22.935	22.4981	22.6971	10.2463	11.1037	1.17264	1.11334	0.965893	1.56577	1.41483
246.088	C12H13N3O3	144.624	247467	1	0.036521	0.0399728	0.0419047	0.0205568	0.0215066	0	0	0	1.39708	1.12267	1.79515	0.12795	0.0958798	0	0	0	0.0174128	0.0239038
246.114	C14H17NO3	1732.86	283740	1	1.50668	1.48358	1.44382	1.12721	1.14837	0.373026	0.46173	0.427607	6.57986	7.59859	7.08243	2.58236	2.80317	0.0728454	0.109528	0.120875	1.62993	1.69837
246.15	C15H21NO2	230.527	277168	1	0.111652	0.104457	0.120568	0.103697	0.119407	0	0	0	0	0	0	0	0	0	0	0	0	0
246.989	C11H4O7	766.296	279817	1	0	0	0	0	0	3.54054	3.09962	3.56864	1.83749	1.78951	1.97466	2.56705	2.33418	5.20134	5.41916	5.89696	0	0
246.992	C8H8O7S	60.2456	272119	1	0	0	0	0	0	0.0525473	0.0563574	0.0803318	0.484149	0.464367	0.711931	0.18089	0.220868	0.0798529	0.104018	0	0	0
247.007	C12H8O4S	294.499	256662	1	0	0	0	0	0	0.235213	0.276281	0.234457	0.502209	1.09528	0.723322	0.247842	0.183905	0.214901	0.144192	0.162325	0	0
247.025	C12H8O6	6413.9	285919	1	0.197587	0.263348	0.239698	0	0	29.0785	28.8792	29.8695	41.5771	41.4015	42.4602	27.4455	29.5554	44.4056	42.5363	41.9942	0.0388968	0.0426667
247.028	C9H12O6S	302.798	263198	1	0	0	0	0	0	0.0915459	0.0957333	0.0829203	2.22676	2.61992	2.53892	0.242064	0.162993	0	0.0623388	0.0783177	0	0
247.036	C11H8N2O5	508.011	256047	1	0.0194251	0.0263519	0.0279344	0	0	0.300895	0.246479	0.3623	7.32164	6.93963	7.44274	1.13751	1.2955	0	0.111355	0.0686726	0.0152906	0.0168028
247.04	C16H8O3	785.197	278679	1	0.0132295	0	0.0161931	0	0	3.41147	3.68623	3.37088	7.40688	7.31141	7.61418	4.73418	4.71535	2.27637	2.44394	2.24291	0	0
247.061	C13H12O5	9559.4	287263	1	3.97404	4.58055	4.06737	1.02146	1.11607	44.6575	43.8715	44.5181	55.6434	58.5936	58.1017	50.492	53.5468	54.4606	52.3771	49.4025	2.3472	2.41933
247.065	C10H16O5S	1408.07	271825	1	0.0364346	0.0460467	0.0711861	0.0638422	0.0375805	0	0	0	17.9651	18.6426	18.748	0.529067	0.531385	0.156324	0.18658	0.138394	0	0
247.072	C12H12N2O4	1259.06	271805	1	0.366265	0.399345	0.410452	0.129072	0.153637	0.877268	0.852837	1.03512	15.7048	16.5603	15.8707	4.89941	5.32619	0.196675	0.343554	0.194844	0.440709	0.414505
247.077	C17H12O2	1339.98	287115	1	0.362701	0.391487	0.355434	0	0	5.93027	5.88748	6.24027	10.8809	12.8372	11.664	6.60057	6.45823	2.24099	2.22216	2.10244	0.0542545	0.0266914
247.082	C10H16O7	224.131	251439	1	0	0	0	0.00674399	0.0149184	0.100039	0.0984149	0.0562551	0.288078	0.424374	0.278853	0.181552	0.307854	0.166876	0.325754	0.315758	0	0
247.088	C16H12N2O	46.1141	245836	1	0	0	0	0	0	0	0	0	0.703747	0.295481	0.37009	0	0	0	0	0	0	0
247.098	C14H16O4	11696.7	285897	1	13.6602	14.245	13.76	7.47795	7.79137	30.9407	32.2273	31.2432	48.8939	50.9798	49.0541	43.3663	46.1444	32.5902	31.8238	31.0144	7.30858	7.31688
247.109	C13H16N2O3	1089.72	278860	1	0.694518	0.706848	0.76176	0.603886	0.628465	0.0950837	0.17868	0.189657	5.4208	5.38765	5.23843	1.25534	1.65962	0	0	0	1.08677	0.993559
247.134	C15H20O3	11081.9	285487	1	10.8399	11.2065	10.825	7.20864	7.06934	12.7409	13.6185	13.1304	26.4257	28.283	27.1254	22.457	22.3351	12.2643	12.2955	12.235	4.68857	4.62571
247.145	C14H20N2O2	74.4499	273059	1	0	0.0168605	0.0111458	0.048429	0.0439946	0	0	0	0	0	0	0	0	0	0	0	0.0197227	0.0372258
247.17	C16H24O2	1615.38	284694	1	2.16557	2.14957	2.06991	1.0401	1.01809	0.91497	0.814244	0.802287	2.74722	2.47433	2.33506	2.41085	2.53753	1.02955	0.746375	1.02623	0.460766	0.363507
248.02	C11H7NO6	648.932	281482	1	0	0	0	0	0	0.871435	1.15665	1.03129	8.02706	9.07569	8.71896	1.84436	1.94174	0.549688	0.626365	0.708203	0	0
248.031	C10H7N3O5	52.3418	122823	1	0	0	0	0	0	0	0	0	0.564163	0.78673	0.685144	0	0	0	0	0	0	0
248.035	C15H7NO3	110.607	220085	1	0	0	0	0	0	0.137058	0.0876415	0.119204	1.68798	1.35401	1.5128	0.241997	0.332861	0	0	0	0	0
248.039	C12H11NO3S	47.5146	233100	1	0	0	0	0	0	0.0560871	0	0.0396394	0.47508	0.561288	0.696125	0.261454	0.265592	0	0	0	0	0
248.057	C12H11NO5	1573.4	286940	1	0.448577	0.442599	0.409779	0.0886988	0.0998844	5.12204	5.33676	5.47181	22.3184	22.5866	23.0516	11.274	11.0593	2.48023	2.24085	3.00358	0.374807	0.453371
248.068	C11H11N3O4	242.495	186288	1	0	0.0205094	0.0112899	0	0	0	0	0	2.83311	3.31145	3.55273	0.164583	0.238401	0	0	0	0.0185961	0.0180355
248.072	C16H11NO2	465.519	275696	1	0.0338478	0.0598539	0.0528529	0	0	0.561479	0.66739	0.60167	5.82718	6.99704	5.76562	1.33786	1.14188	0	0	0	0	0
248.093	C13H15NO4	2411.01	286213	1	1.81585	1.90914	1.85841	1.55755	1.60601	2.68663	2.92041	3.1549	17.1893	17.5752	17.3982	8.7191	9.67256	0.758835	0.675436	0.756931	2.59651	2.59827
248.104	C12H15N3O3	103.544	256392	1	0.0154308	0.0258107	0.0308176	0.0256488	0.0496401	0	0	0	0.387807	0.665338	0.36009	0	0	0	0	0	0.0280666	0.017541
248.129	C14H19NO3	1624.07	279857	1	0.85473	0.776068	0.790754	1.05644	1.03722	0.15674	0.0438263	0.137767	1.4293	1.41478	1.73443	0.43768	0.806085	0	0	0	0.880961	0.841399
249.004	C11H6O7	2711.83	281004	1	0	0	0	0	0	11.4618	11.6421	12.629	14.05	14.1165	14.0848	9.39416	10.2486	18.3104	18.4598	18.5702	0	0
249.008	C8H10O7S	169.889	266898	1	0	0	0	0	0	0	0	0	2.42921	2.55353	2.04218	0.0853462	0.0998993	0	0	0	0	0
249.015	C10H6N2O6	65.8025	252674	1	0	0	0	0	0	0.0551725	0.0597867	0	0.806307	0.807477	0.964056	0.104396	0.0654517	0	0	0	0	0
249.019	C15H6O4	124.837	269909	1	0	0	0	0	0	0.593895	0.586068	0.492742	1.65014	1.04625	0.941123	0.919143	0.721275	0.473902	0.418447	0.482701	0	0
249.023	C12H10O4S	416.058	263722	1	0	0	0	0	0	0.597125	0.697775	1.00621	1.38889	1.23628	1.48705	0.898707	0.687032	0.656967	0.68763	0.612796	0	0
249.041	C12H10O6	8068.97	286477	1	1.15152	1.28262	1.19719	0.113867	0.109644	35.3752	34.8622	37.53	43.2295	42.8953	43.1024	39.0524	42.5524	65.3012	62.1697	62.9372	0.355753	0.29107
249.052	C11H10N2O5	731.883	265048	1	0.0490701	0.0707193	0.0572792	0.0106798	0.00715188	0.632065	0.819918	0.678332	9.04372	10.8073	9.64694	2.47494	2.34525	0.192001	0.375705	0.309646	0.0446673	0.0821754
249.056	C16H10O3	2611.68	284805	1	0.288343	0.301187	0.301017	0	0	11.5713	12.013	12.1626	22.1401	23.575	22.5178	13.6469	13.4015	8.53217	7.99183	8.00982	0.0341135	0.0333599
249.067	C15H10N2O2	373.61	232969	1	0	0.0166511	0.0234177	0	0	0.12367	0.194416	0.175931	4.95924	5.61559	4.5903	0.287689	0.619409	0	0	0	0	0
249.077	C13H14O5	9025.12	285282	1	8.21948	9.199	8.38828	4.82729	5.3255	40.8162	40.5056	42.0299	56.3546	55.0506	53.8675	53.8035	57.5312	52.1365	50.4919	49.8922	4.86315	4.69582
249.088	C12H14N2O4	1042.22	279646	1	0.601248	0.622923	0.686191	0.663746	0.694237	0.447749	0.559047	0.599837	11.4805	11.8989	11.0815	3.77339	3.94314	0.163622	0.218818	0.17556	0.817295	0.755018
249.092	C17H14O2	1201.39	284624	1	1.01043	0.997437	1.02965	0.0406915	0.0422467	5.44848	5.38975	5.59488	8.73731	9.37813	9.23529	5.44875	5.00858	1.56269	1.64293	1.54163	0.176297	0.167635
249.113	C14H18O4	25196.3	285819	1	15.181	16.8771	15.1694	15.5999	16.7836	29.1179	27.9498	28.439	46.6946	48.3179	46.9177	41.8431	45.6493	37.3202	34.8122	34.6621	8.47111	8.14608
249.125	C13H18N2O3	664.624	278018	1	0.188125	0.24269	0.203004	0.432332	0.433274	0	0	0	0.677941	0.784127	0.612432	0.260168	0.18048	0	0	0	0.388125	0.376891
249.129	C18H18O	300.091	276496	1	0.328947	0.412071	0.281117	0.0157193	0.0121145	0.196844	0.171619	0.189428	0.22268	0.244811	0.403205	0.181583	0.14639	0	0	0	0.0565948	0.042454
249.15	C15H22O3	7365.66	286373	1	5.44241	6.0465	5.42271	4.59573	4.90638	6.1335	6.25848	5.96713	14.4271	14.5212	15.2032	12.9195	13.6461	7.86243	7.35043	6.94352	1.97068	1.93671
249.186	C16H26O2	263.708	276949	1	0.16616	0.17424	0.172445	0.158404	0.17566	0	0	0	0.146213	0.137122	0.219909	0.249117	0.245457	0	0	0	0	0
250.018	C11H9NO4S	45.6054	252329	1	0	0	0	0	0	0	0	0	0.485036	0.66148	0.438375	0.168495	0.233082	0	0	0	0	0
250.036	C11H9NO6	1084.2	283447	1	0.0228038	0.0250928	0.0311479	0	0	2.16093	2.19898	2.01349	10.0085	10.511	10.4686	4.13025	4.2776	1.47344	1.53016	1.38555	0.0374938	0.0324998
250.047	C10H9N3O5	68.1739	162033	1	0	0	0	0	0	0	0	0	1.0404	0.721202	0.942672	0	0	0	0	0	0	0
250.051	C15H9NO3	763.263	275343	1	0.0244374	0	0.0198141	0	0	1.3387	1.18822	1.47545	11.2153	10.7938	11.1824	2.71399	3.04211	0.119796	0.0732717	0.0822167	0	0
250.054	C12H13NO3S	22.874	211476	1	0	0.0151498	0.0117533	0	0	0.0397272	0	0.0479089	0.34908	0.124348	0.275943	0.0723536	0.0696998	0	0	0	0	0
250.062	C14H9N3O2	73.4701	170410	1	0	0	0	0	0	0	0	0	0.891524	0.952896	1.07639	0	0	0	0	0	0	0
250.072	C12H13NO5	1565.41	286395	1	0.978763	1.00469	0.87877	0.863667	0.881735	4.48482	4.68246	4.73434	19.3932	20.0261	19.3674	11.3657	11.3058	2.66459	2.36357	2.51668	1.35052	1.42537
250.083	C11H13N3O4	128.652	217505	1	0.0188007	0.0250866	0.01862	0.0109745	0.0126239	0	0	0	1.23427	1.38876	1.16565	0.126842	0.187789	0	0	0	0	0
250.087	C16H13NO2	316.787	279463	1	0.0617659	0.0767204	0.0795063	0	0	0.481933	0.455438	0.350381	3.99611	4.30021	3.93837	0.501108	0.811443	0	0	0	0.0157786	0.0173979
250.109	C13H17NO4	3908.36	281287	1	1.43244	1.46491	1.45041	2.54235	2.53188	0.781803	0.751477	0.920422	6.85843	7.59587	6.89478	4.51199	4.29414	0.217069	0.155351	0.210374	2.23498	2.06997
250.12	C12H17N3O3	47.2734	224168	1	0.0112297	0	0.0135351	0.0307509	0.026612	0	0	0	0	0	0	0	0	0	0	0	0	0
250.145	C14H21NO3	2505.91	284190	1	0.284031	0.311612	0.240212	1.63007	1.35391	0.204591	0.151706	0.0708642	2.12439	2.04608	1.20155	1.11404	0.860426	2.96492	2.51894	3.13783	0.473792	0.393884
250.983	C10H4O8	492.908	280529	1	0	0	0	0	0	1.97476	2.19849	2.18671	0.645761	0.498055	0.540799	1.02563	0.654918	3.42878	3.08832	2.99449	0	0
251.002	C11H8O5S	734.407	268489	1	0	0	0	0	0	0.079716	0.0841452	0.146258	0.721966	0.845902	0.831989	0.221962	0.224508	0.133923	0.152496	0	0	0
251.017	C15H8O2S	32.043	231544	1	0	0	0	0	0	0.0401272	0.0889651	0.0520196	0.389476	0.427016	0.44091	0.0954082	0.103924	0	0	0	0	0
251.02	C11H8O7	4533.29	284596	1	0.0167228	0.0210503	0.0230371	0	0	15.0978	15.6736	14.9043	15.9106	16.9896	16.2729	12.1851	12.5277	34.7706	35.8546	33.6995	0	0
251.031	C10H8N2O6	114.823	258003	1	0	0	0	0	0	0.220709	0.252314	0.17976	1.32422	1.40031	1.68224	0.288275	0.332146	0.165568	0	0.0677872	0	0
251.035	C15H8O4	2462.88	283994	1	0.0670446	0.0709525	0.0339958	0	0	11.1982	11.2434	11.4696	20.947	21.0526	21.1207	12.6751	13.3938	11.8129	10.7453	10.5198	0	0
251.038	C12H12O4S	769.459	258553	1	0.14873	0.165778	0.12146	0	0	0.557871	0.584305	0.603134	0.953766	1.26233	1.11802	0.854183	0.6732	0.343696	0.444199	0.464448	0	0
251.056	C12H12O6	8481.21	285189	1	2.9129	3.05561	3.12861	1.22693	1.20741	37.459	38.7408	38.1489	38.5631	41.0125	39.9351	41.9695	42.6466	68.032	67.0794	65.9107	1.39942	1.28195
251.067	C11H12N2O5	605.504	273859	1	0.0986075	0.108812	0.121292	0.06926	0.088058	0.647378	0.687627	0.595383	8.21895	8.91416	8.87109	2.5763	2.96418	0.19072	0.291375	0.313373	0.115093	0.133436
251.071	C16H12O3	3155.46	285888	1	1.216	1.39956	1.20745	0.0305008	0.0492417	14.7519	13.8928	14.695	24.7338	24.4951	25.1578	14.6916	15.5571	9.33445	8.48923	7.93646	0.296634	0.310736
251.075	C13H16O3S	443.66	216634	1	0.257115	0.287894	0.284568	0.0132026	0.0199411	0.139061	0.113721	0.226652	0	0.30049	0.316749	0.274247	0.319029	0	0	0	0	0
251.083	C15H12N2O2	296.952	252020	1	0.0385365	0.0415726	0.0286314	0	0	0.101125	0.0723766	0.0716692	3.94914	4.10019	3.60211	0.576788	0.375875	0	0	0	0	0
251.093	C13H16O5	27626.1	284316	1	12.7588	13.3561	12.9232	17.9705	18.1964	40.3475	41.8984	41.4777	49.918	52.4899	50.4259	52.6415	54.226	50.1828	49.513	49.4515	6.13569	5.84726
251.104	C12H16N2O4	1491.05	278918	1	0.374996	0.351055	0.341334	0.904781	0.993208	0.147432	0.101492	0.167388	2.79429	3.20271	3.09726	1.00164	1.13142	0	0.107043	0.0646213	0.647902	0.648425
251.108	C17H16O2	1430.31	285185	1	1.69872	1.85534	1.72065	0.158481	0.231201	4.19254	4.18102	4.15425	5.61921	6.38684	5.48414	4.19331	4.38186	0.871456	0.844601	0.891668	0.585334	0.544537
251.129	C14H20O4	23631	284150	1	10.2372	10.4387	10.2146	15.3717	15.5775	17.1122	18.0558	17.2877	31.6468	33.3815	32.8493	28.5568	29.1046	26.8345	26.3614	26.339	4.59995	4.53867
251.132	C11H24O4S	388.559	280153	1	0	0	0	0	0	0	0	0	0	0	0	0	0	3.26419	2.89418	2.85149	0	0
251.14	C13H20N2O3	96.844	268852	1	0.0188658	0.0152667	0.0134436	0.0447335	0.0645092	0	0	0	0	0	0	0	0	0	0	0	0.019774	0.0247369
251.144	C18H20O	540.783	277952	1	0.559596	0.622339	0.535559	0.0462731	0.0493704	0.183089	0.175353	0.176738	0.193443	0.300921	0.234086	0.214158	0.205142	0	0	0	0.115979	0.155998
251.165	C15H24O3	1525.59	282664	1	1.24886	1.29635	1.20032	0.977997	0.935221	0.389553	0.368957	0.380152	2.5847	2.50777	2.28392	3.11015	2.89824	1.169	0.856693	1.0294	0.0966143	0.084605
252.015	C10H7NO7	101.667	264402	1	0	0	0	0	0	0.0514991	0.0862763	0.156695	0.855935	0.642987	0.815865	0.246671	0.162349	0.0888182	0.130724	0.162373	0	0
252.03	C14H7NO4	501.621	272477	1	0	0	0	0	0	0.741164	0.670203	0.688229	6.47828	7.53968	7.33368	1.45787	1.52192	0.0716871	0.123984	0.0745832	0	0
252.034	C11H11NO4S	46.7661	232969	1	0	0	0	0	0	0	0	0	0.432323	0.353635	0.227797	0.179422	0.223001	0	0	0	0	0
252.041	C13H7N3O3	82.1848	140821	1	0	0	0	0	0	0.0664495	0	0.0652769	1.00765	1.23529	0.928874	0.0731693	0.0747214	0	0	0	0	0
252.051	C11H11NO6	1171.44	282811	1	0.10169	0.10166	0.0889711	0.0275804	0.0319066	2.91853	3.06772	3.07138	9.97495	10.8538	11.1488	5.69539	6.01175	2.48381	2.07417	2.44274	0.0936467	0.102928
252.063	C10H11N3O5	44.0582	170462	1	0	0	0	0	0	0	0	0	0.554033	0.662222	0.581708	0.116765	0.0687357	0	0	0	0	0
252.067	C15H11NO3	1028.32	280978	1	0.147836	0.116554	0.102004	0	0	2.09814	2.0676	2.11534	13.5459	14.0652	15.0656	3.92443	4.08024	0.143476	0.165507	0.10436	0.0209344	0.0456027
252.078	C14H11N3O2	57.6541	133440	1	0	0	0	0	0	0	0	0	0.760746	0.61806	0.771595	0	0	0	0	0	0	0
252.088	C12H15NO5	3650.75	284600	1	1.19085	1.18254	1.19351	2.37478	2.42527	2.38919	2.47501	2.33926	10.0944	11.1313	11.8298	8.51132	8.49151	1.29353	1.15041	1.3111	1.44389	1.4236
252.099	C11H15N3O4	83.2073	229060	1	0	0	0	0.0249708	0.0333736	0	0	0	0.301355	0.4613	0.365856	0	0	0	0	0	0	0
252.103	C16H15NO2	337.547	275958	1	0.135121	0.144741	0.153815	0.0225369	0.0139082	0.0996133	0.074568	0.075342	1.7671	1.68398	2.28993	0.373583	0.384003	0	0	0	0.0349608	0.0307282
252.124	C13H19NO4	2262.95	279099	1	0.415342	0.423523	0.420586	1.47203	1.49783	0	0	0	0.81294	0.640892	0.562431	0.518481	0.56962	0	0	0	0.40542	0.406494
252.16	C14H23NO3	18.5432	281296	1	0	0	0	0.0120622	0.00996792	0	0	0	0	0	0	0	0	0	0	0	0	0
252.999	C10H6O8	533.479	274822	1	0	0	0	0	0	1.36365	1.10078	1.20747	0.771384	0.612346	0.862926	0.305447	0.19238	3.6976	3.63368	4.16108	0	0
253.014	C14H6O5	1271.54	283860	1	0	0	0	0	0	5.38044	5.39417	5.92154	8.12383	9.68934	9.76868	7.14909	6.99743	6.93725	6.97125	7.08276	0	0
253.018	C11H10O5S	1049.13	262533	1	0.0450942	0.0602153	0.0303129	0	0	0.194542	0.29809	0.239586	1.01908	1.14287	0.780503	0.33613	0.232804	0.143539	0.132639	0.239243	0	0
253.035	C11H10O7	6623.28	282811	1	0.176765	0.215011	0.201488	0.0251179	0.0166075	19.9942	20.6198	21.911	18.8387	19.208	19.5524	19.7941	20.1529	51.113	50.7627	51.6609	0.0701067	0.0769506
253.047	C10H10N2O6	138.825	260019	1	0	0	0	0	0	0.436028	0.320128	0.433757	1.74151	1.82319	2.03389	0.725663	0.544663	0.154726	0.195641	0.19298	0.0128924	0.0208505
253.051	C15H10O4	4758.66	281688	1	0.694689	0.699882	0.597749	0.0134526	0.0100821	21.1759	22.0191	22.1611	35.9589	38.1569	37.294	22.6479	23.5027	16.7085	16.2541	16.6657	0.142108	0.109353
253.054	C12H14O4S	3291	234488	1	4.22679	4.59026	4.21701	0	0	0.135571	0.18867	0.20593	1.14922	0.673276	0.909774	0.328305	0.382707	0.100303	0.130956	0.0896401	0.0247366	0.0303168
253.062	C14H10N2O3	752.058	248461	1	0.0320786	0.0245189	0.0495776	0	0	0.548026	0.647807	0.641354	8.88618	9.25725	11.0182	1.44731	1.44305	0.127311	0.151494	0.198998	0.0263904	0.0175781
253.072	C12H14O6	12394.1	283538	1	5.58265	6.16794	5.83471	7.91356	8.25591	40.4736	41.3347	43.6644	36.0205	37.1733	38.0964	39.1893	40.8443	56.8104	55.7139	55.71	2.44849	2.36792
253.083	C11H14N2O5	492.02	273382	1	0.122529	0.129832	0.0834437	0.267203	0.327742	0.367483	0.272338	0.370448	3.92241	4.06068	4.48441	1.97429	1.81741	0.127703	0.0746346	0.181127	0.119997	0.139134
253.087	C16H14O3	2753.16	285075	1	2.51333	2.61158	2.53202	0.277161	0.328605	12.0492	12.7169	12.8215	21.1704	23.3846	22.5071	13.8291	14.3165	6.16819	5.65062	6.00412	1.16814	1.08943
253.098	C15H14N2O2	334.12	267148	1	0.0456524	0.0542494	0.0342194	0	0	0	0	0	2.47057	2.7683	2.54379	0.421696	0.482756	0	0	0	0.0430022	0.0334933
253.108	C13H18O5	40377.5	283398	1	10.9238	11.6142	10.863	25.4661	26.8961	30.0932	29.9258	32.356	41.8214	43.2571	44.3104	42.1978	43.9166	40.8041	40.0057	40.8247	4.35289	4.22715
253.119	C12H18N2O4	668.048	275659	1	0.0617571	0.0691414	0.0318007	0.396994	0.444997	0	0	0	0.367715	0.30496	0.175571	0.101438	0.158672	0	0	0	0.0584695	0.0760633
253.123	C17H18O2	2220.91	284086	1	2.90122	2.86773	2.80135	0.59746	0.61092	3.95584	3.75326	3.92296	7.02692	8.20004	7.83981	4.70529	4.81255	1.14618	1.15651	1.00239	1.20289	1.29128
253.145	C14H22O4	6651.44	284575	1	3.02742	3.19664	2.94733	4.3267	4.27956	3.77283	3.5898	4.08793	9.91685	10.9147	10.2449	10.3484	10.9005	9.88908	9.56889	9.73605	0.895103	0.794035
253.16	C18H22O	672.61	279150	1	0.831681	0.825918	0.861867	0.0937077	0.118985	0.0932016	0.0830171	0.149957	0.345261	0.309096	0.242862	0.230945	0.178921	0	0	0	0.209778	0.201096
253.181	C15H26O3	79.2067	279006	1	0.0109908	0.012048	0	0.00570708	0.0071432	0	0	0	0	0	0	0	0	0	0	0	0	0
254.01	C13H5NO5	58.1264	259740	1	0	0	0	0	0	0.0468549	0	0.0369072	0.620589	0.873676	0.684702	0.189037	0.193033	0	0	0	0	0
254.013	C10H9NO5S	36.5582	237912	1	0	0	0	0	0	0	0	0	0.497926	0.549493	0.532909	0.180009	0.0753174	0	0	0	0	0
254.031	C10H9NO7	358.322	270335	1	0	0	0	0	0	0.23274	0.243569	0.230064	1.15001	1.20885	1.26835	0.369818	0.577072	0.318841	0.392356	0.267373	0	0
254.046	C14H9NO4	1282.32	280633	1	0.0187331	0.063056	0.0566405	0	0	2.83123	3.10364	2.82471	19.0859	18.1683	18.787	5.14707	5.07975	0.287791	0.327276	0.502471	0.0179182	0.0262251
254.049	C11H13NO4S	40.1541	218994	1	0	0	0	0	0	0	0	0	0	0.166362	0.148886	0.0889984	0.160084	0	0	0	0	0
254.057	C13H9N3O3	137.991	164103	1	0.191293	0.179993	0.165114	0	0	0	0	0	1.81551	1.94883	2.02167	0	0	0	0	0	0	0
254.067	C11H13NO6	1187.12	283071	1	0.203284	0.214886	0.186773	0.479309	0.532981	2.48838	2.74864	2.75608	7.70437	8.72261	8.78714	6.13423	6.2543	2.32225	2.19643	2.12988	0.268291	0.283972
254.078	C10H13N3O5	36.6336	232196	1	0	0	0	0	0	0	0	0	0.243682	0.408838	0.343523	0	0	0	0	0	0	0
254.082	C15H13NO3	915.208	279883	1	0.34515	0.377315	0.346359	0.0256395	0.0187515	1.49683	1.37762	1.56217	11.729	11.3257	11.9623	3.28711	3.4566	0	0.0654738	0.105772	0.175778	0.161151
254.094	C14H13N3O2	54.6106	157170	1	0	0	0	0	0	0	0	0	0.273309	0.507217	0.372929	0	0	0	0	0	0	0
254.103	C12H17NO5	3613.58	277370	1	0.524088	0.566382	0.442982	2.25973	2.40706	0.240342	0.114397	0.270367	2.08343	2.14792	1.88324	1.92483	1.76398	0.173517	0.149584	0.0821319	0.420892	0.395614
254.115	C11H17N3O4	32.7187	249576	1	0	0	0	0.0201343	0.0217944	0	0	0	0	0	0	0	0	0	0	0	0	0
254.119	C16H17NO2	425.514	278045	1	0.184938	0.21674	0.239055	0.0539077	0.0361554	0.0475796	0.0542642	0.059739	0.714853	0.730008	0.933184	0.143093	0.164161	0	0	0	0.0908102	0.089457
254.14	C13H21NO4	403.358	274420	1	0.0359676	0.0131843	0.0234174	0.254195	0.268683	0	0	0	0	0	0	0	0	0	0	0	0	0
254.997	C10H8O6S	325.093	262398	1	0	0	0	0	0	0.115348	0.0886165	0.0917808	0.646723	0.730706	0.633317	0.127564	0.113197	0	0	0	0	0
255.012	C14H8O3S	50.9108	244673	1	0	0	0	0	0	0.127919	0.119596	0.171135	0.507417	0.597438	0.745882	0.188344	0.178384	0.11921	0.117603	0.0974171	0	0
255.015	C10H8O8	1255.63	275274	1	0	0	0	0	0	2.7939	3.11336	3.3173	1.3268	0.773072	1.50589	1.92956	2.06867	9.81373	9.93099	9.66079	0	0
255.03	C14H8O5	4243.73	283326	1	0.106142	0.112575	0.100641	0	0	19.8777	19.7586	19.763	32.6067	33.2074	33.583	19.0364	20.5335	19.637	18.738	18.3985	0	0
255.033	C11H12O5S	4117.8	259777	1	0.216113	0.304816	0.264517	0.00671434	0.00644349	0.163608	0.108843	0.179287	1.17118	0.745249	1.04187	0.443763	0.529691	0.104563	0.0810491	0.131799	0.0170336	0.0196755
255.051	C11H12O7	5809.32	283750	1	0.963522	1.1196	1.01849	0.781307	0.75261	26.6911	26.8006	27.054	16.8865	17.1584	17.4786	16.8129	17.6232	44.6458	43.3043	41.1352	0.296672	0.228616
255.062	C10H12N2O6	134.159	257770	1	0	0	0	0	0	0.462718	0.465832	0.410836	1.45472	1.7028	1.96553	0.616951	0.576233	0.144829	0.116231	0.179324	0	0
255.066	C15H12O4	5297.64	282073	1	2.0215	2.40255	2.18873	0.149221	0.161468	24.3924	24.8706	24.412	37.6628	40.3359	39.3941	25.7334	27.5934	17.1287	16.9035	15.8898	0.914505	0.76858
255.07	C12H16O4S	1556.98	219290	1	0.521506	0.497116	0.595979	0.0195382	0.0157968	0.0747276	0.0538765	0.054417	0.280336	0.217165	0.401362	0.160039	0.203704	0.0796189	0	0.0614084	0.0368837	0.0154547
255.078	C14H12N2O3	806.053	248733	1	0.141154	0.152516	0.141727	0.0073133	0.0105205	0.41533	0.29643	0.265185	9.61306	10.4149	10.8778	2.20808	1.78878	0	0	0	0.100343	0.107721
255.082	C19H12O	25.5369	249486	1	0	0	0	0	0	0.126735	0.0886315	0.109832	0.34159	0.279355	0.255138	0.119876	0.174197	0	0	0	0	0
255.087	C12H16O6	25634.4	282271	1	6.49366	7.23359	6.67208	16.1831	17.0755	36.3305	36.9899	37.3784	30.4329	31.6327	31.0065	33.4533	34.6729	45.9878	44.7099	42.5207	2.239	2.36359
255.099	C11H16N2O5	300.974	269036	1	0.0341545	0.0507853	0.0301402	0.164972	0.200484	0.0664199	0.0453125	0.144746	0.559693	0.522744	0.564238	0.207101	0.333959	0	0	0	0.0360573	0.029059
255.103	C16H16O3	3555.23	283393	1	4.55695	4.7923	4.50062	0.97772	1.04734	11.3861	11.2788	11.63	19.3395	19.674	19.9753	13.4689	14.5519	6.39645	5.5891	5.11089	2.4793	2.40888
255.114	C15H16N2O2	293.492	257547	1	0.0889291	0.0639028	0.094862	0	0	0	0	0	1.41985	2.02734	1.28009	0.248235	0.371373	0	0	0	0.0491707	0.076544
255.124	C13H20O5	16941.6	283228	1	3.92545	4.32779	3.82904	10.7283	11.285	9.23237	9.4984	9.10091	17.6393	19.61	18.8306	16.7622	17.4935	18.9213	18.5477	17.708	1.53141	1.47662
255.135	C12H20N2O4	51.0171	278451	1	0	0	0	0.0223928	0.0339833	0	0	0	0	0	0	0	0	0	0	0	0	0
255.139	C17H20O2	3056.64	281960	1	3.6794	4.22572	3.9167	1.09245	1.15819	3.55989	3.91188	3.47946	5.49683	5.99463	5.57891	5.02231	4.97539	1.50983	1.49689	1.26455	1.90811	1.94818
255.16	C14H24O4	467.903	277907	1	0.108315	0.0692758	0.10567	0.242406	0.211689	0	0	0	0.15282	0.222021	0	0.340959	0.57319	0.374613	0.269529	0.33344	0	0
255.176	C18H24O	550.514	276048	1	0.727728	0.767904	0.666621	0.0906129	0.0853081	0.0540617	0	0.0726988	0.231976	0.322935	0.253964	0.13385	0.129516	0	0.0815637	0.0775237	0.0992298	0.150255
256.025	C13H7NO5	782.516	277018	1	0	0	0	0	0	1.09577	1.51258	1.40822	10.7612	10.0892	11.4644	1.76475	2.13881	0.221548	0.176322	0.138342	0	0
256.029	C10H11NO5S	54.9329	215164	1	0	0	0	0	0	0	0	0	0.275088	0.413596	0.223801	0.17609	0.0962516	0	0	0	0	0
256.036	C12H7N3O4	209.525	142214	1	0	0	0	0	0	0	0	0	1.063	0.946649	0.781211	0	0	0	0	0	0	0
256.046	C10H11NO7	231.612	265991	1	0	0	0	0	0	0.301292	0.306935	0.407158	0.973182	0.772009	1.17751	0.405979	0.475436	0.4855	0.51688	0.258038	0	0
256.062	C14H11NO4	1441.7	280636	1	0.235815	0.281781	0.232643	0.0163263	0.0190955	3.51768	3.95687	4.14106	21.5996	20.3195	21.122	7.42749	7.68544	0.643499	0.4384	0.591032	0.1312	0.16953
256.073	C13H11N3O3	179.949	201766	1	0	0	0	0	0	0	0	0	1.96779	1.88133	2.63639	0	0	0	0	0	0	0
256.08	C15H15NOS	680.593	231929	1	0	0	0	0	0	0	0	0	0	0	0	4.77546	5.04461	0	0	0	0	0
256.083	C11H15NO6	1361.12	276221	1	0.113828	0.104388	0.139334	0.857072	0.906661	0.510296	0.309126	0.544681	1.99178	2.58837	2.19645	1.77716	2.08484	0.311942	0.325752	0.338193	0.0824139	0.104499
256.098	C15H15NO3	1150.08	279728	1	0.701657	0.805982	0.746218	0.16039	0.18751	0.696187	0.625731	0.714331	6.85535	7.97745	8.43727	1.99984	2.60213	0	0	0	0.396952	0.451745
256.109	C14H15N3O2	29.8937	172444	1	0	0	0	0	0	0	0	0	0.304688	0.167233	0.155865	0	0	0	0	0	0	0
256.119	C12H19NO5	1163.98	271672	1	0.0236702	0.0492732	0.0203522	0.695489	0.775345	0	0	0	0	0	0	0.0955757	0.0979616	0	0	0	0.0130458	0.0291377
256.134	C16H19NO2	430.617	272667	1	0.208013	0.254357	0.249797	0.079305	0.0690774	0	0	0	0.277866	0.258086	0.285573	0.0726015	0.0780204	0	0	0	0.0610603	0.0563769
257.009	C13H6O6	1955.72	283256	1	0	0	0	0	0	8.7908	8.52206	9.10778	13.8584	14.7091	15.5322	7.29821	8.39727	11.275	10.0972	10.185	0	0
257.013	C10H10O6S	845.568	270685	1	0	0	0	0	0	0.337878	0.185982	0.190608	0.673931	0.902468	0.813323	0.133663	0.244698	0.156777	0.191171	0.120279	0	0
257.02	C12H6N2O5	128.998	254906	1	0	0	0	0	0	0	0	0	1.96864	1.7268	1.79782	0.141844	0.116913	0	0	0	0	0
257.03	C10H10O8	2000.95	279978	1	0.0110295	0.0150781	0	0	0	6.75943	6.85591	7.38513	2.14887	2.54874	2.38476	1.81665	1.93035	16.7354	15.8259	15.3397	0	0
257.046	C14H10O5	6750.36	280837	1	0.928076	1.0113	0.963356	0.0183278	0.0254832	32.0433	31.3757	31.4364	46.0729	47.2507	46.8635	31.5274	33.0183	30.4154	29.1993	27.1983	0.224857	0.17496
257.049	C11H14O5S	13079	259568	1	2.1439	2.08468	2.0865	0.210387	0.213956	0.0998299	0.0800577	0.128611	0.782291	0.620129	0.602499	3.12995	3.44717	0.120032	0.110025	0.136429	0.0184777	0.016864
257.057	C13H10N2O4	942.334	248315	1	0.0850613	0.0559023	0.0960941	0	0	0.600343	0.79565	0.703827	12.4675	13.1854	13.8059	2.48796	2.69874	0.2691	0.287878	0.131165	0.0568975	0.0880614
257.061	C18H10O2	224.653	267499	1	0	0	0	0	0	0.834263	1.05467	0.88212	2.06443	1.98051	2.43333	1.37774	1.42454	0.34383	0.299938	0.349652	0	0
257.067	C11H14O7	5282.03	282775	1	1.35692	1.48225	1.42384	2.32459	2.49926	22.8492	23.4683	24.2466	15.5247	15.3051	15.3772	14.9216	15.1846	29.6219	29.0305	27.4148	0.387647	0.335133
257.082	C15H14O4	4968.94	280683	1	4.34304	4.94387	4.65586	0.937448	1.04892	22.8177	22.5728	23.1404	35.7864	37.2219	36.2468	27.2065	28.9444	17.5934	17.2553	15.8683	2.59401	2.47184
257.085	C12H18O4S	565.313	257824	1	0.0297027	0.0589009	0.0638455	0.0485964	0.0403713	0	0	0	0.224897	0.196143	0	0	0	0	0	0	0	0
257.093	C14H14N2O3	1011.19	264104	1	0.335058	0.375236	0.312864	0.0552143	0.0645854	0.260511	0.390446	0.283141	9.09606	9.41677	9.9123	1.74499	1.91168	0	0	0	0.375487	0.38612
257.097	C19H14O	36.3721	265929	1	0.0246977	0.0209177	0.0232411	0	0	0.0694051	0.147932	0.105004	0.477447	0.546695	0.438063	0.100344	0.215351	0	0	0	0	0
257.103	C12H18O6	13137.2	282592	1	2.80005	3.28437	2.89312	7.98054	8.75091	12.0537	12.0074	12.4892	13.1976	14.3265	14.1203	16.7096	17.9156	20.4156	19.2376	18.5786	0.719886	0.677064
257.118	C16H18O3	5816.7	281502	1	7.44074	8.11363	7.45017	2.25417	2.53756	11.3261	11.1867	11.0132	20.0768	20.8182	20.4767	14.7503	15.7191	8.31159	7.43785	7.42299	3.914	3.89596
257.13	C15H18N2O2	243.856	268858	1	0.0791047	0.0687075	0.0959621	0.0267188	0.0265644	0	0	0	0.253013	0.529425	0.551681	0	0	0	0	0	0.0653863	0.073005
257.14	C13H22O5	1482	274730	1	0.183024	0.193265	0.215395	0.924181	0.987182	0	0.0719809	0.064214	0.590768	0.492018	0.30863	1.86238	1.66731	3.52689	3.97128	3.35575	0	0
257.155	C17H22O2	3430.2	278962	1	4.45405	4.71623	4.39537	1.32364	1.32908	2.78317	2.80258	2.72269	5.35219	5.98298	5.49483	4.89553	4.76353	2.01125	1.86416	2.04749	1.76739	1.68388
257.191	C18H26O	221.649	277001	1	0.308491	0.288096	0.256859	0.0233637	0.016635	0	0	0	0	0	0	0	0	0	0	0	0.0165964	0.0352069
258.005	C12H5NO6	87.3464	266546	1	0	0	0	0	0	0.0801784	0.0703006	0.155687	1.11651	1.09211	1.27969	0.189175	0.149757	0	0	0	0	0
258.041	C13H9NO5	1329.2	279911	1	0.044938	0.0396275	0.0459769	0	0	3.28453	3.2556	3.64257	18.6833	19.4619	19.4737	5.35452	5.67096	0.790115	0.868698	0.817696	0.0319605	0.0263969
258.044	C10H13NO5S	50.3686	190529	1	0	0	0	0	0	0	0	0	0	0.197946	0.263464	0	0	0	0	0	0	0
258.052	C12H9N3O4	1245.1	202103	1	0.0440635	0.0555056	0.0374671	0	0	0	0	0	1.40611	1.54308	1.6238	0	0	0	0	0	0	0
258.056	C17H9NO2	75.5925	228941	1	0	0	0	0	0	0.0807234	0	0.0793784	1.10205	1.1362	1.00409	0.233534	0.180265	0	0	0	0	0
258.062	C10H13NO7	49.8479	249482	1	0	0	0	0	0	0.0898462	0.109338	0.0728413	0.377469	0.368554	0.382745	0.203728	0.148966	0.0656703	0.0633422	0	0	0
258.077	C14H13NO4	1474.39	281596	1	0.823684	0.862295	0.806796	0.155776	0.18548	3.38991	3.28698	3.59519	19.6077	19.8716	20.0903	7.78925	7.89869	0.596308	0.397949	0.505527	0.720183	0.703323
258.088	C13H13N3O3	167.723	188050	1	0.0247997	0	0.0227336	0.0113991	0.0072771	0	0	0	1.64239	1.68091	1.17078	0.114915	0.126073	0	0	0	0	0
258.098	C11H17NO6	198.989	269842	1	0.0109907	0.0125485	0.0113084	0.12944	0.0999208	0	0	0	0	0	0	0.0723354	0.0876833	0	0	0	0	0
258.114	C15H17NO3	1339.31	278362	1	1.04464	1.03769	1.10867	0.444979	0.51717	0.226271	0.370781	0.37692	4.30817	4.5183	4.07159	1.32825	1.52701	0	0	0	0.697881	0.753235
258.15	C16H21NO2	220.545	276323	1	0.107988	0.114116	0.0840998	0.0600854	0.0494007	0	0	0	0	0	0	0	0	0	0	0	0.0258153	0.0228274
258.956	C8H4O8S	10.176	260261	1	0	0	0	0	0	0	0	0	0	0.133059	0.131196	0	0	0	0	0	0	0
258.992	C9H8O7S	101.209	262861	1	0	0	0	0	0	0	0	0	0.712152	0.710292	0.604615	0	0	0	0	0	0	0
259.007	C13H8O4S	100.204	256292	1	0	0	0	0	0	0.132202	0.170762	0.219544	0.664073	0.564506	0.652459	0.155785	0.198682	0.129486	0.150643	0.0782503	0	0
259.025	C13H8O6	5006.96	279596	1	0.0854787	0.098667	0.109282	0	0	22.7294	23.506	22.9906	32.5649	33.0846	33.2345	20.9853	22.0678	29.4619	29.0124	27.2501	0.0247363	0.0221355
259.028	C10H12O6S	1315.55	269092	1	0.0120743	0.0147804	0.0175926	0.00596024	0.00895283	0.160689	0.142565	0.0979534	1.26937	1.43574	1.2918	0.246409	0.209031	0.217992	0.0887979	0.100033	0	0
259.04	C17H8O3	250.917	256220	1	0	0	0	0	0	0.825169	1.02755	0.86512	2.83534	2.51005	2.04481	1.90306	1.36948	0.568555	0.587882	0.482824	0	0
259.046	C10H12O8	1654.59	268679	1	0	0	0	0	0	6.73909	7.16794	7.70543	2.6595	2.72533	2.36235	1.91476	1.93474	12.7348	12.2268	11.7946	0	0
259.061	C14H12O5	7605.23	279390	1	2.8988	2.99746	2.89226	0.472134	0.521444	33.6713	34.9138	35.4175	48.6109	52.8432	51.1568	40.7845	41.9578	34.7331	33.1913	34.3935	1.30746	1.33363
259.065	C11H16O5S	483.239	250450	1	0.042378	0.0700453	0.0442893	0.066803	0.101113	0.0881185	0.0526955	0.0380567	0.679325	0.63233	0.76359	0.288028	0.222377	0	0	0	0.0233922	0.039523
259.072	C13H12N2O4	1108.93	265003	1	0.305622	0.352153	0.345671	0.0624007	0.0827649	0.782048	0.721662	0.803251	15.9496	14.7344	16.0916	3.66844	4.47649	0.137116	0.144409	0.173797	0.363982	0.375299
259.077	C18H12O2	823.162	274838	1	0.07442	0.105635	0.0912253	0	0	3.67331	3.86446	3.49668	6.6157	6.72938	5.89221	3.686	3.60504	1.04931	0.857558	0.828973	0	0
259.082	C11H16O7	3002.49	280864	1	0.421681	0.390952	0.378641	1.25913	1.34776	6.82226	6.96841	6.91078	4.99281	5.73462	5.62319	6.62301	6.39008	10.1541	10.3856	9.63149	0.0809263	0.0766306
259.098	C15H16O4	7156.7	278608	1	9.12021	9.72603	9.17043	3.3003	3.36611	20.6676	21.4172	22.1836	36.6209	38.1339	37.8089	30.7864	31.5734	18.2042	17.2281	17.9006	4.91754	4.80677
259.101	C12H20O4S	153.082	263535	1	0.0201946	0.0198798	0.0176771	0.0903945	0.10197	0	0	0	0.337079	0.418442	0.158835	0	0	0	0	0	0	0
259.109	C14H16N2O3	1018.4	267880	1	0.465245	0.522626	0.435074	0.273677	0.296244	0.132916	0.265844	0.0926836	6.35047	5.40766	5.28215	1.17376	1.52149	0	0	0	0.85132	0.788019
259.113	C19H16O	35.2131	271129	1	0.0440447	0.0259295	0.0346393	0	0	0.127596	0.0942226	0.1046	0.16788	0.204555	0.321465	0.0876827	0.0811455	0	0	0	0	0
259.119	C12H20O6	1365.49	274420	1	0.117219	0.114723	0.137591	0.869715	0.878715	0.208902	0.153603	0.11522	0.532805	0.532001	0.544355	2.16306	1.95391	1.8798	2.06356	2.01662	0.0124986	0.0184522
259.134	C16H20O3	7199.6	280122	1	9.15045	9.77599	9.22541	3.88485	3.95248	9.96318	9.8766	10.0542	20.8054	20.9457	20.3148	15.3234	16.333	8.40134	7.64188	7.97629	4.33014	4.05459
259.145	C15H20N2O2	83.1302	272069	1	0.0153946	0	0.0272907	0.0285646	0.0403637	0	0	0	0	0	0	0	0	0	0	0	0.0222198	0.0181704
259.17	C17H24O2	2106.87	278582	1	2.6609	2.91174	2.6997	0.814413	0.810097	1.10843	0.916739	1.14965	2.76226	2.72229	2.67152	2.21418	2.64854	0.481	0.61275	0.540903	0.654852	0.610789
260.02	C12H7NO6	422.796	272041	1	0	0	0	0	0	0.769101	0.805788	0.73404	5.44635	6.15154	6.19428	1.22064	1.09798	0.175299	0.304393	0.239017	0	0
260.057	C13H11NO5	1483.61	279276	1	0.299722	0.25057	0.283523	0.0266422	0.0337156	4.53345	4.40875	4.57876	21.0722	22.0961	21.736	9.92683	9.59015	1.62266	1.43359	1.74693	0.363339	0.366884
260.068	C12H11N3O4	207.682	196397	1	0.013387	0.0188737	0	0	0	0	0	0	2.43239	2.44881	3.04269	0	0	0	0	0	0.0266903	0.0119263
260.072	C17H11NO2	243.372	266533	1	0.0111626	0.0179483	0	0	0	0.279399	0.14946	0.262513	3.6946	3.03811	3.56559	0.567739	0.492108	0	0	0	0	0
260.093	C14H15NO4	1583.92	279475	1	1.48398	1.69284	1.51768	0.899782	0.871081	1.8665	2.01716	2.15089	15.0233	15.477	15.5705	7.09989	7.30416	0.405724	0.430137	0.36743	1.83893	1.63591
260.104	C13H15N3O3	94.3825	226729	1	0	0	0	0.0275153	0.0182191	0	0	0	0.492383	0.549007	0.624105	0	0	0	0	0	0	0
260.129	C15H19NO3	1188.18	277090	1	0.828947	0.930754	0.861365	0.668585	0.711549	0.0455112	0.056313	0	1.50626	1.76285	1.4136	0.619989	0.621779	0	0	0	0.763082	0.609893
260.166	C16H23NO2	31.2203	275974	1	0	0.0143434	0.0253926	0.0150754	0.0108534	0	0	0	0	0	0	0	0	0	0	0	0	0
261.004	C12H6O7	1812.97	279259	1	0	0	0	0	0	7.94887	8.14607	8.44299	10.3173	10.3445	9.47248	7.96989	7.88428	14.6868	13.908	14.0161	0	0
261.008	C9H10O7S	72.8904	267511	1	0	0	0	0	0	0.0858147	0.0803525	0.0518079	1.11238	0.771261	0.94354	0.078364	0.113391	0.0905532	0.0749028	0	0	0
261.015	C11H6N2O6	30.886	229160	1	0	0	0	0	0	0	0	0	0.314638	0.464235	0.304681	0	0	0	0	0	0	0
261.019	C16H6O4	31.8366	244316	1	0	0	0	0	0	0.128116	0.121651	0.116826	0.400824	0.47055	0.408065	0.241462	0.209443	0.149553	0.112963	0.173878	0	0
261.023	C13H10O4S	321.051	259699	1	0	0	0	0	0	0.692681	0.820719	0.842856	0.947047	0.883861	1.28303	0.525234	0.638128	0.77346	0.763591	0.545578	0	0
261.038	C17H10OS	18.0213	234477	1	0	0	0	0	0	0	0	0	0	0	0	0.0795205	0.09146	0	0	0	0	0
261.041	C13H10O6	7194.27	278483	1	0.774446	0.906303	0.796728	0.0321618	0.0397025	32.1141	32.8264	33.5037	42.693	43.6215	43.8709	34.7335	37.7678	48.5226	47.8225	47.3177	0.192609	0.179235
261.044	C10H14O6S	4719.03	268559	1	0.0326353	0.0179376	0.024974	0.0264061	0.0276139	0.288432	0.275783	0.283963	70.8565	69.8351	69.1374	0.602849	0.503572	0.282216	0.121845	0.0839125	0.0322608	0.0481536
261.052	C12H10N2O5	876.445	259660	1	0.0646713	0.0957986	0.0729434	0.0130189	0.00542372	0.58567	0.757835	0.634975	10.6956	11.9722	12.8406	2.77883	2.88541	0.259967	0.226209	0.259709	0.0816049	0.131942
261.056	C17H10O3	1774.06	274165	1	0.0776602	0.0774166	0.0754395	0	0	7.7566	7.68872	8.26178	14.7122	14.1386	15.5636	8.99612	8.85582	4.68014	4.28464	4.75628	0	0
261.062	C10H14O8	260.306	262788	1	0	0	0	0	0	0.819516	0.861429	0.904669	0.597952	0.439937	0.541416	0.401815	0.446412	1.71859	1.63412	1.77323	0	0
261.063	C11H10N4O4	18.1801	73037.4	1	0	0	0	0	0	0	0	0	0.273088	0.273258	0.26626	0	0	0	0	0	0	0
261.067	C16H10N2O2	169.875	241770	1	0	0	0	0	0	0	0	0	2.09227	2.37042	2.48879	0.285175	0.309229	0	0	0	0	0
261.077	C14H14O5	7222.53	277536	1	6.61236	7.02721	6.93309	2.41055	2.48651	33.2712	33.9074	32.9956	48.2133	50.483	47.2418	42.805	45.1074	38.4994	37.2344	34.8568	3.88826	3.81943
261.08	C11H18O5S	464.05	250389	1	0.0385826	0.0355127	0.0425466	0.0465096	0.0467613	0.0522081	0.0656053	0	0.757979	0.917708	0.869231	0.118517	0.194529	0	0	0	0.0210215	0.0153994
261.088	C13H14N2O4	1259.55	269582	1	0.633881	0.703511	0.691038	0.416953	0.456357	0.647041	0.613822	0.556926	13.6824	14.0118	12.8747	4.20325	4.27569	0.186175	0.172511	0.222743	0.88146	0.952014
261.092	C18H14O2	711.89	277075	1	0.287999	0.263364	0.286598	0	0	3.18893	2.94302	3.31527	4.79857	4.54372	4.50045	3.08507	3.11383	0.929422	1.02075	0.756718	0.0181863	0.0220495
261.098	C11H18O7	350.478	250718	1	0	0	0	0.0371694	0.0421384	0.0777301	0.0830851	0.0520118	0.130944	0.144328	0.390111	0.266465	0.250723	0.361068	0.326605	0.244587	0	0
261.113	C15H18O4	14045.2	277642	1	14.2928	14.9357	14.3053	8.61317	8.55453	21.3719	21.9969	21.8909	38.4473	41.2602	40.4732	34.4218	35.0121	22.6728	21.883	22.7519	7.32411	7.09317
261.125	C14H18N2O3	706.825	269331	1	0.439084	0.369536	0.385876	0.406513	0.455179	0	0	0	0.958851	0.991923	0.863083	0.159854	0.249156	0	0	0	0.675624	0.646313
261.15	C16H22O3	5638.61	278899	1	7.05077	7.67259	7.00387	3.64249	3.75596	6.32769	6.25087	6.70124	15.6342	15.6645	15.3361	11.3899	12.7713	6.05435	5.98075	5.74594	2.79537	2.80785
261.186	C17H26O2	528.711	275425	1	0.73586	0.67619	0.600298	0.0883404	0.117324	0.08271	0.100201	0.0544492	0.194065	0.24052	0	0.196844	0.295728	0	0	0	0.0592795	0.0749452
262.036	C12H9NO6	944.278	275876	1	0.0171804	0	0.0116935	0	0	2.17719	2.38603	2.32855	11.4461	12.4398	11.7638	4.73277	4.69284	1.11137	1.2231	1.39672	0.0224563	0.031431
262.047	C11H9N3O5	414.321	163391	1	0	0	0	0	0	0	0	0	5.91448	6.22749	5.79126	0	0	0	0	0	0	0
262.051	C16H9NO3	501.118	266540	1	0	0	0	0	0	0.643291	0.770884	0.864613	7.54144	6.71302	7.34176	1.04457	1.35226	0.0671849	0	0.0742178	0	0
262.054	C13H13NO3S	27.5478	207101	1	0	0	0	0	0	0	0.0431673	0.0509454	0.420407	0	0.363794	0	0	0	0	0	0	0
262.062	C15H9N3O2	46.4745	141032	1	0	0	0	0	0	0	0	0	0.562607	0.657015	0.680886	0	0	0	0	0	0	0
262.072	C13H13NO5	1526.72	280398	1	0.900057	1.04422	0.958232	0.54301	0.633716	4.41443	4.23692	4.53006	21.0564	20.9708	21.2703	10.6305	11.3162	1.80705	1.98845	1.65937	1.13122	1.11402
262.083	C12H13N3O4	157.772	215646	1	0	0.0386255	0.0325742	0.0151669	0.0167065	0	0	0	1.66602	1.25277	1.5324	0	0	0	0	0	0.0235259	0.0219954
262.087	C17H13NO2	169.293	264888	1	0.024448	0	0.0252546	0	0	0.185809	0.241877	0.215616	2.03079	1.73382	2.48027	0.334879	0.403308	0	0	0	0	0
262.109	C14H17NO4	2655.15	277537	1	1.83291	1.93662	1.76235	1.6523	1.76863	1.05572	0.878198	0.741463	9.52048	10.0912	9.28017	4.8728	4.59212	0.151872	0.327277	0.19839	2.6048	2.61353
262.12	C13H17N3O3	59.0049	232083	1	0.038526	0	0.0252232	0.0290442	0.0390521	0	0	0	0.230424	0.253563	0.189816	0	0	0	0	0	0.0275997	0.0201995
262.145	C15H21NO3	646.543	272798	1	0.272069	0.294097	0.313704	0.42057	0.396191	0	0	0	0.293113	0.276866	0.170012	0	0	0	0	0	0.163598	0.152744
262.983	C11H4O8	104.592	273002	1	0	0	0	0	0	0.382102	0.481713	0.487085	0	0	0	0.164154	0.151387	0.440424	0.436058	0.376842	0	0
263.002	C12H8O5S	116.027	260157	1	0	0	0	0	0	0.0951951	0.0478524	0.113962	0.429994	0.691736	0.555982	0.0890304	0.146541	0	0	0	0	0
263.017	C16H8O2S	18.7907	231777	1	0	0	0	0	0	0.056816	0.0546157	0	0.126364	0.282435	0.195382	0	0	0	0	0	0	0
263.02	C12H8O7	4426.48	276831	1	0.0192799	0.0294412	0.0361676	0	0	16.5372	17.5107	18.6411	20.843	20.6196	21.3464	17.3136	17.3423	34.2661	33.8439	34.5261	0	0
263.023	C9H12O7S	115.272	249754	1	0	0	0	0	0	0.182532	0.162804	0.173271	0.949057	1.00905	0.780237	0.0914646	0.107487	0.0673433	0.0851116	0	0	0
263.031	C11H8N2O6	161.671	253523	1	0	0	0	0	0	0.149482	0.0707092	0.222581	2.2615	2.43002	2.19666	0.46126	0.378734	0.074576	0.0671999	0.127027	0	0
263.035	C16H8O4	1433.22	274485	1	0	0	0	0	0	6.61086	6.44726	6.67448	13.1096	14.1232	13.1167	8.48498	8.32073	6.2219	5.98416	6.34223	0	0
263.056	C13H12O6	8177.92	279946	1	2.72585	2.85723	2.71004	0.862529	0.863757	38.0287	37.6373	38.0845	43.8283	46.04	44.6921	41.5306	44.3173	60.2801	58.7503	56.0803	1.21391	1.29632
263.059	C10H16O6S	810.372	244310	1	0.0331213	0.026862	0.0411177	0.0244816	0.0317288	0.328811	0.249016	0.27696	7.13124	7.21457	8.0109	0.658669	0.419497	0.219835	0.295033	0.127082	0.018894	0.0216509
263.067	C12H12N2O5	1021.2	268620	1	0.184358	0.17381	0.180767	0.0681156	0.0927912	0.837863	0.918631	0.908239	11.0333	12.355	12.7709	3.62376	3.94213	0.426041	0.453466	0.287571	0.279875	0.25839
263.071	C17H12O3	2141.32	279713	1	0.438348	0.56282	0.397253	0	0	9.6287	9.61131	9.9721	16.0752	17.1682	16.8884	9.63642	10.2022	5.01534	4.76365	4.68621	0.0626067	0.0279102
263.075	C14H16O3S	776.845	223465	1	0.717791	0.866215	0.775577	0	0	0.243124	0.248498	0.329529	0	0	0	0	0	0.0881555	0	0.0845182	0	0
263.083	C16H12N2O2	163.504	231850	1	0	0.0148555	0.0351765	0	0	0	0.0678294	0.10107	1.84709	2.02739	1.81294	0.141329	0.0864992	0	0	0	0	0
263.093	C14H16O5	16842.2	277650	1	12.6361	13.5133	12.6705	10.8792	11.2189	33.5684	34.8028	36.019	49.4474	53.1699	51.793	49.4589	50.026	42.1323	41.3584	42.8583	7.13269	6.89325
263.104	C13H16N2O4	1662.83	274028	1	0.823194	0.986247	0.887303	1.03183	1.10764	0.177509	0.287725	0.316683	7.5725	7.16605	6.74723	2.60694	2.83987	0.0693442	0.0703067	0	1.54258	1.61476
263.108	C18H16O2	608.025	275390	1	0.803394	0.692231	0.688391	0.0183451	0.029201	2.38276	2.31119	2.32415	2.91019	3.1627	3.1316	1.69968	1.74922	0.242319	0.193948	0.329668	0.062957	0.0627595
263.129	C15H20O4	20120.3	277447	1	13.7303	15.2921	13.8317	12.4329	13.4025	18.1001	17.7964	18.2411	36.3584	36.2299	35.0726	30.566	33.4916	26.4304	26.3495	23.9869	7.03936	6.81936
263.132	C12H24O4S	352.652	283056	1	0	0	0	0	0	0	0	0	0	0	0	0	0	0.323998	0.170912	0.199105	0	0
263.14	C14H20N2O3	222.942	269051	1	0.0580368	0.0661787	0.075805	0.133962	0.148505	0	0	0	0	0	0	0	0	0	0	0	0.147193	0.10337
263.144	C19H20O	123.639	268135	1	0.15504	0.167888	0.154559	0.0095928	0.00604097	0.102499	0	0.0654679	0	0	0	0	0	0	0	0	0.0240424	0.0182807
263.165	C16H24O3	2564.41	277670	1	3.10434	3.17064	2.97448	1.66812	1.62635	1.62277	1.61811	1.48377	5.20853	5.73543	5.07271	5.19047	4.90055	1.39689	1.4711	1.66855	0.807581	0.692911
264.015	C11H7NO7	232.756	267162	1	0	0	0	0	0	0.221706	0.275312	0.283015	1.98204	1.8276	2.31835	0.445507	0.450271	0.219126	0.150868	0.198285	0	0
264.03	C15H7NO4	237.981	259019	1	0	0	0	0	0	0.382699	0.357389	0.315664	3.60944	2.84198	3.48661	0.488163	0.633805	0	0	0	0	0
264.034	C12H11NO4S	39.0272	220539	1	0	0	0	0	0	0	0	0	0.581175	0.283984	0.530999	0.19423	0.160692	0	0	0	0	0
264.051	C12H11NO6	1148.71	277850	1	0.116657	0.113366	0.144869	0.0259951	0.0389798	3.41993	3.87861	3.74489	13.9036	13.6242	14.3891	7.31575	7.1481	2.23312	2.54028	2.38833	0.167328	0.187174
264.063	C11H11N3O5	107.016	151494	1	0	0	0	0	0	0	0	0	1.42401	1.3631	1.56786	0.0917943	0.0755099	0	0	0	0	0
264.067	C16H11NO3	618.533	268911	1	0.0496022	0.0394408	0.0365086	0	0	1.03207	1.095	1.13874	9.18364	8.27474	9.06198	1.91827	2.02337	0	0	0	0	0
264.078	C15H11N3O2	40.7806	106154	1	0	0.0355299	0.0173902	0	0	0	0	0	0.53633	0.303833	0.300166	0	0	0	0	0	0	0
264.088	C13H15NO5	3006.91	279298	1	1.49118	1.8135	1.51577	1.89192	2.00295	2.91382	3.33602	3.30456	16.5089	15.6976	15.9773	10.3825	10.3117	1.58913	1.3903	1.3864	2.3359	2.31955
264.099	C12H15N3O4	96.5185	225597	1	0	0	0	0.0461616	0.0577177	0	0	0	0.565169	0.592064	0.853146	0.0732535	0.0905483	0	0	0	0.0194629	0.0164825
264.103	C17H15NO2	121.496	270199	1	0.0379015	0.0317373	0.0532467	0.00549221	0.00615871	0.156028	0.104012	0.0864891	1.22738	1.08027	0.745792	0.131391	0.174748	0	0	0	0	0
264.124	C14H19NO4	2838.34	275244	1	1.11583	1.0901	1.27823	1.77503	1.89066	0.217702	0.225561	0.0659343	2.10591	2.14091	2.53453	1.41383	1.68613	0	0	0	1.49084	1.48533
264.135	C13H19N3O3	36.8461	232351	1	0	0	0	0.023968	0.011742	0	0	0	0	0	0	0	0	0	0	0	0	0
264.161	C15H23NO3	114.173	273828	1	0.0166753	0.0189965	0.025889	0.0742686	0.061817	0	0	0	0	0	0	0	0	0	0	0	0	0
264.999	C11H6O8	1253.89	271086	1	0	0	0	0	0	4.64785	5.13432	5.14849	1.7944	2.33238	1.7326	3.60186	3.44323	9.95679	9.91722	9.68684	0	0
265.002	C8H10O8S	29.5902	250192	1	0	0	0	0	0	0	0	0	0.320495	0.444759	0.317335	0	0	0	0	0	0	0
265.014	C15H6O5	452.167	271370	1	0	0	0	0	0	2.07336	2.12277	2.01843	3.8329	3.18714	3.96303	2.72777	3.02142	2.48201	2.85563	2.44146	0	0
265.018	C12H10O5S	686.011	258956	1	0.114417	0.132388	0.121327	0	0	0.309094	0.237878	0.334151	1.38091	1.20687	1.23799	0.489937	0.300038	0.300758	0.225015	0.314055	0	0
265.033	C16H10O2S	39.5635	223871	1	0	0	0	0	0	0.111682	0.101737	0.184247	0.346821	0.243392	0.427737	0.108999	0.0655831	0	0	0	0	0
265.035	C12H10O7	6878.54	276194	1	0.25853	0.305069	0.273965	0.0166453	0.0216239	24.0347	24.5263	24.5101	23.9643	23.9659	23.6822	20.9896	22.9324	54.1341	54.4036	52.1292	0.0525568	0.0481232
265.047	C11H10N2O6	294.745	259782	1	0	0	0	0	0	0.560678	0.572805	0.664387	4.18691	4.34812	4.31823	1.14447	1.07793	0.221342	0.338805	0.363193	0.0157041	0.0257749
265.051	C16H10O4	3130.51	274932	1	0.200685	0.223924	0.201308	0	0	14.7764	14.6967	14.3693	24.1711	24.7054	24.5928	14.7763	15.5835	11.193	10.8854	10.431	0.0249673	0.0271762
265.072	C13H14O6	8769.2	276917	1	5.9422	6.6002	6.26525	5.16899	5.59275	38.1537	39.0704	40.4778	43.0005	44.4223	44.1417	45.3143	47.2758	56.9836	54.9944	56.0098	3.0767	2.97913
265.083	C12H14N2O5	874.643	271057	1	0.368601	0.39575	0.320644	0.523302	0.582613	0.504675	0.578164	0.660203	8.14045	9.09761	8.31532	3.47639	3.19132	0.191531	0.180158	0.222224	0.522797	0.461843
265.087	C17H14O3	2019.23	278092	1	1.13941	1.37151	1.21172	0.0358707	0.052121	8.95075	8.76003	9.40353	15.3438	13.7527	14.8359	10.291	10.0459	3.9732	3.68051	3.85621	0.344799	0.303535
265.091	C14H18O3S	360.218	208204	1	0.333796	0.291885	0.274806	0.0869587	0.0990692	0.0537823	0.118052	0.14024	0.534875	0.310656	0.377029	0.283288	0.223014	0	0	0	0.0670134	0.0720194
265.098	C16H14N2O2	151.56	245444	1	0.0262592	0.0144576	0.0201845	0	0	0.0482152	0	0.0479916	1.20209	1.13848	1.47958	0.134408	0.142041	0	0	0	0	0
265.108	C14H18O5	41510.8	276724	1	16.9629	17.6231	17.244	27.0024	27.1792	35.2729	36.1573	36.2724	50.1844	53.5822	51.8008	49.4255	50.2029	50.0137	48.1625	49.5142	8.10306	8.02889
265.119	C13H18N2O4	1538.89	271377	1	0.349511	0.419931	0.348863	0.930912	1.02507	0	0	0	0.701108	1.13972	1.07686	0.399814	0.50975	0	0	0	0.844943	0.905964
265.123	C18H18O2	1044.49	276684	1	1.30489	1.35709	1.27317	0.0844689	0.0825659	1.48241	1.69563	1.8047	2.49848	2.26629	2.35824	1.53347	1.4229	0.348627	0.228553	0.218783	0.313433	0.287488
265.145	C15H22O4	12833.4	276784	1	7.644	8.4475	7.51506	7.91168	8.54853	8.96295	9.30413	9.07145	23.2255	22.5832	22.1831	20.659	21.3296	17.8862	17.2179	16.7325	3.57268	3.21711
265.148	C12H26O4S	15459.2	278965	1	0.65032	0.635782	0.555438	1.30701	0.953135	0.0716476	0.0649667	0	1.64272	1.08052	1.24803	6.56034	6.2715	11.5317	10.9514	10.6678	6.987	6.57485
265.16	C19H22O	202.908	269305	1	0.252235	0.221947	0.260001	0.00914838	0.00919258	0	0.0600286	0.126342	0	0	0	0	0	0	0	0	0.0603026	0.0427275
265.181	C16H26O3	235.04	270712	1	0.317937	0.305748	0.301175	0.117188	0.129785	0	0	0	0	0.239684	0.35276	0.215131	0.253928	0	0	0	0	0
266.013	C11H9NO5S	47.7421	247927	1	0	0	0	0	0	0	0	0	0.253345	0.677137	0.507119	0.149122	0.228364	0	0	0	0	0
266.031	C11H9NO7	618.178	269977	1	0	0	0	0	0	0.629735	0.756543	0.623867	2.77952	3.47001	3.28855	1.24905	0.945978	0.582542	0.518848	0.738881	0	0
266.046	C15H9NO4	769.587	271033	1	0	0.0173717	0.0164678	0	0	1.45464	1.74664	1.60518	10.9248	10.8017	11.275	2.72905	2.80288	0.0822734	0.0702683	0.195789	0	0
266.049	C12H13NO4S	31.6098	213732	1	0.0121332	0.0115382	0.0141025	0	0	0	0	0	0.232326	0.475115	0.222538	0.145528	0.111396	0	0	0	0	0
266.067	C12H13NO6	1198.21	278010	1	0.454203	0.424212	0.47257	0.598289	0.637735	3.87988	3.97005	4.11166	12.4571	13.9716	13.1565	8.55214	7.96714	2.51416	2.30927	2.87923	0.567128	0.566403
266.078	C11H13N3O5	70.6923	204022	1	0	0	0	0.0173242	0.0126067	0	0	0	0.993941	1.06255	0.886205	0	0	0	0	0	0	0
266.082	C16H13NO3	588.452	272399	1	0.138913	0.147079	0.103894	0	0	1.1012	0.891953	1.05925	7.03918	7.89357	7.06488	1.76929	1.69335	0	0	0	0.0493683	0.0575839
266.094	C15H13N3O2	45.2531	125496	1	0	0	0	0	0	0	0	0	0.296645	0.220724	0.291869	0	0	0	0	0	0	0
266.103	C13H17NO5	5485.05	276445	1	1.4548	1.47436	1.57231	3.43877	3.65368	0.864413	0.970055	1.01422	6.73052	7.55449	6.75884	5.90714	5.6557	0.361978	0.483833	0.459739	2.27095	2.09654
266.115	C12H17N3O4	99.9846	234002	1	0	0	0	0.0639016	0.0666012	0	0	0	0.239932	0.193245	0.270468	0	0	0	0	0	0	0
266.119	C17H17NO2	180.41	268339	1	0.0754612	0.0669963	0.0880061	0.00668199	0.00721198	0	0	0	0.188057	0.434532	0.389533	0.0662015	0.0998384	0	0	0	0.0271485	0.0251746
266.14	C14H21NO4	1181.52	270095	1	0.165473	0.227926	0.227492	0.753651	0.787026	0	0	0	0.183626	0.28607	0.224465	0.155713	0.0877698	0	0	0	0.147466	0.140515
266.997	C11H8O6S	152.746	263793	1	0	0	0	0	0	0.0578899	0.0642669	0.132887	0.459396	0.637081	0.88533	0.126668	0.124616	0	0	0	0	0
267.015	C11H8O8	2928.59	271682	1	0	0	0	0	0	7.62923	7.1816	7.90144	5.40338	5.7646	6.24806	4.48389	5.20184	23.3944	23.1627	22.2576	0	0
267.03	C15H8O5	2876.56	274684	1	0.0167742	0.0374578	0.0118393	0	0	12.458	13.4208	13.3961	21.5819	22.4347	21.6331	13.3465	13.9581	12.2536	11.9003	11.8758	0	0
267.033	C12H12O5S	1166.77	255501	1	0.544643	0.533788	0.54007	0	0	0.29636	0.363218	0.381868	1.37823	1.19743	1.4692	0.604232	0.535845	0.246844	0.272636	0.233005	0	0
267.051	C12H12O7	7279.52	277664	1	1.35637	1.60511	1.35515	0.81081	0.867233	33.2641	33.1072	33.9007	25.5113	26.0758	24.984	25.8708	27.792	55.7837	54.9409	54.0516	0.484909	0.428069
267.062	C11H12N2O6	274.65	260802	1	0.0165611	0.0148197	0.0170423	0.0289218	0.0234184	0.651904	0.73363	0.602782	3.90866	4.05375	4.02382	1.24798	1.48424	0.278675	0.419157	0.227821	0.0475578	0.0557799
267.066	C16H12O4	3868	276740	1	1.09646	1.1395	1.0958	0.0229739	0.0324643	17.9587	18.1589	17.9277	28.2688	28.3354	28.1936	18.6336	19.6634	13.5451	12.8953	12.4651	0.259902	0.305778
267.07	C13H16O4S	2572.82	215965	1	3.30047	3.38782	3.29675	0.0262096	0.0294612	0.11571	0.158419	0.117444	0.838699	0.570629	0.639161	0.302959	0.325833	0	0	0	0.0349396	0.0182567
267.073	C10H12N4O5	14.6725	236213	1	0	0	0	0	0	0	0	0	0.151228	0	0.131996	0	0	0	0.114603	0.114444	0	0
267.077	C15H12N2O3	517.164	246446	1	0.0428812	0.0387738	0.0452662	0	0	0.215391	0.29854	0.364365	6.12069	6.79519	6.72113	1.20501	1.00189	0	0	0	0.0511142	0.0509576
267.087	C13H16O6	38386	275290	1	11.0618	11.9747	11.1004	23.2618	25.5695	45.0315	46.6495	49.7843	44.2501	44.9618	46.1426	49.1977	51.3625	56.4905	56.5048	56.9125	4.66437	4.59853
267.099	C12H16N2O5	1431.65	269025	1	0.250265	0.247298	0.234248	0.889484	0.953641	0.226475	0.191046	0.198265	3.53741	2.80057	3.03825	1.43797	1.24609	0	0.109664	0.155521	0.455154	0.523931
267.103	C17H16O3	1878.78	277792	1	2.35232	2.51739	2.39213	0.235807	0.298654	7.66129	7.93901	7.75336	12.8889	13.1156	12.1642	9.07426	8.75621	3.39783	2.82972	2.9251	1.12717	1.02468
267.106	C14H20O3S	643.811	223482	1	0.50121	0.464091	0.488134	0	0	0.047496	0	0.044902	0.190598	0.18945	0	0.137506	0.127128	0	0	0	0	0
267.114	C16H16N2O2	130.834	234606	1	0	0.0313924	0.0351264	0	0	0	0	0	0.512747	0.668475	0.667546	0.102855	0.0660677	0	0	0	0	0
267.124	C14H20O5	38393.9	275198	1	11.892	12.5519	11.9565	24.6972	25.5748	21.6298	22.1893	22.899	37.2494	39.6102	38.872	35.5278	35.8858	37.636	36.9512	37.7288	4.92352	4.81088
267.135	C13H20N2O4	405.5	263439	1	0.0322393	0.0431456	0.0407256	0.263774	0.21996	0	0	0	0	0	0	0	0	0	0	0	0.0750378	0.056027
267.139	C18H20O2	1695.72	274734	1	2.04612	2.28728	2.07245	0.352438	0.392471	1.76197	1.76062	1.79276	2.83921	2.62809	2.70762	2.06499	2.23991	0.533499	0.600375	0.456667	0.732587	0.779244
267.16	C15H24O4	2678.96	273337	1	1.92476	1.95348	1.90246	1.74264	1.65853	0.871752	0.713141	0.618883	4.75438	4.84917	4.8489	7.34206	7.6496	5.86761	5.57662	5.73022	0.303988	0.354837
267.175	C19H24O	214.199	270130	1	0.298122	0.243649	0.273933	0	0	0	0	0	0.126416	0.193424	0	0	0	0	0	0	0.041542	0.0591661
267.197	C16H28O3	28.3434	264763	1	0	0	0	0.0184371	0.0107144	0	0	0	0	0	0	0	0	0	0	0	0	0
267.992	C10H7NO6S	15.3881	253202	1	0	0	0	0	0	0	0	0	0.123401	0	0.170129	0	0	0	0	0	0	0
268.025	C14H7NO5	390.526	266157	1	0	0	0	0	0	0.743163	0.549542	0.572246	5.95981	5.27197	5.48376	1.0195	0.874028	0.127837	0.141083	0.122812	0	0
268.046	C11H11NO7	585.615	263847	1	0	0.0145765	0.0130273	0	0	1.55101	1.48912	1.64693	2.53418	3.10873	3.08026	1.56838	1.91265	0.893348	0.972254	1.06677	0.025163	0.0239515
268.062	C15H11NO4	1113.08	273078	1	0.0899284	0.0957209	0.114584	0	0	2.73019	2.55258	2.78032	16.1273	16.1569	16.3075	5.35671	5.49271	0.3303	0.297234	0.326006	0.0432755	0.0410968
268.073	C14H11N3O3	119.226	151278	1	0.113046	0.156312	0.14523	0	0	0	0	0	1.22745	1.03398	0.955268	0.0933151	0.0794857	0	0	0	0	0
268.083	C12H15NO6	3508.67	276385	1	0.711542	0.794753	0.624965	2.16954	2.33718	2.20019	2.02467	2.30349	6.99793	7.18228	8.13374	5.88476	6.30482	1.69981	1.45794	1.84227	0.876717	0.82915
268.094	C11H15N3O5	48.452	220031	1	0	0	0	0.0306185	0.0315832	0	0	0	0.16509	0.529787	0.36868	0	0	0	0	0	0	0
268.098	C16H15NO3	685.237	271769	1	0.351626	0.370457	0.338839	0.0364898	0.0404384	0.401211	0.55718	0.438557	4.52652	4.99693	4.84104	1.18468	1.22502	0	0	0	0.153192	0.171233
268.109	C15H15N3O2	29.2238	137737	1	0	0	0	0	0	0	0	0	0.229047	0.194756	0.194332	0	0	0	0	0	0	0
268.119	C13H19NO5	3438.27	271133	1	0.460812	0.521437	0.48477	2.07345	2.29029	0.0652674	0	0.0561501	0.661885	0.843647	0.606345	0.849988	0.706814	0	0	0	0.631566	0.58545
268.134	C17H19NO2	220.268	265374	1	0.0884806	0.0991895	0.0847262	0.0132461	0.0211383	0	0	0	0.221115	0.131661	0.135905	0	0	0	0	0	0.0204669	0.0611623
269.009	C14H6O6	1185.92	274382	1	0	0	0	0	0	5.24832	5.56749	5.46386	5.92945	7.14149	7.11271	5.15471	5.22099	6.60468	6.49662	6.1514	0	0
269.013	C11H10O6S	763.422	267092	1	0	0	0	0	0	0.141614	0.168544	0.221294	0.928821	0.57317	1.09824	0.0984367	0.29022	0.101515	0.127585	0.1316	0	0
269.03	C11H10O8	3112.27	270674	1	0.0119476	0.0169686	0	0	0	13.1908	13.526	14.4938	6.33986	6.8682	6.56278	5.7883	5.88197	22.9128	23.7123	23.1136	0	0
269.046	C15H10O5	5254.81	272813	1	0.420842	0.399387	0.396764	0	0	23.3248	24.6696	24.0415	36.2497	39.0615	37.4143	24.9797	25.2095	21.0217	21.1566	20.6056	0.0823809	0.104609
269.049	C12H14O5S	7370.94	237472	1	2.41104	2.51092	2.36025	0.0306036	0.0326117	0.142012	0.206598	0.275969	1.15137	1.6078	1.2469	0.886538	0.646511	0.118846	0.10566	0.15521	0.0343703	0.0371421
269.061	C19H10O2	115.383	233870	1	0	0	0	0	0	0.349867	0.43502	0.496065	1.76086	1.64876	1.35621	0.785501	0.625337	0.123382	0.135416	0.158693	0	0
269.067	C12H14O7	9449.07	276370	1	3.51583	3.9511	3.58725	5.50222	6.05355	41.3014	42.0438	44.0043	26.463	27.3456	25.6039	27.0946	28.7892	49.97	49.1865	49.0908	1.36416	1.23745
269.078	C11H14N2O6	256.387	258253	1	0.0305099	0.018381	0.0284936	0.119432	0.130778	0.415741	0.252926	0.408214	1.91059	1.92582	2.37004	0.881223	0.786179	0.1515	0.0903597	0.154506	0.0397013	0.0432993
269.082	C16H14O4	3548.35	275088	1	2.71938	2.75415	2.61694	0.313295	0.30028	16.0725	16.5938	16.5246	26.2185	27.5874	27.2719	20.1762	20.0723	11.0338	10.8737	10.8042	1.23411	1.3112
269.085	C13H18O4S	1152.89	232050	1	0.367537	0.330934	0.383238	0.103524	0.0939345	0.0810518	0.073102	0	0.281833	0.451139	0.203417	0.199094	0.141375	0.112618	0	0.0966755	0.0215376	0.0223361
269.093	C15H14N2O3	633.929	242421	1	0.144032	0.181176	0.149146	0	0	0.239075	0.161784	0.2303	5.8062	5.89936	5.46221	1.25425	1.46681	0	0	0	0.191137	0.129964
269.103	C13H18O6	45397.6	274306	1	10.0008	11.299	10.1349	27.801	30.24	36.4116	35.1998	36.515	37.1219	37.5414	38.0326	39.9966	42.6339	47.8734	47.5701	45.5964	4.14422	4.09706
269.114	C12H18N2O5	451.584	264436	1	0.0412336	0.0527721	0.0498061	0.293751	0.291046	0	0	0	0.34088	0.320191	0.279576	0.15324	0.123902	0	0	0	0.0673603	0.053801
269.118	C17H18O3	3376.13	275399	1	4.19904	4.40607	4.32609	0.988111	0.971359	7.22535	7.44881	7.77511	13.1193	12.2708	12.8446	9.47216	9.92506	3.6475	3.56022	3.29952	2.23546	2.12854
269.13	C16H18N2O2	116.061	246377	1	0.0181373	0.022173	0.0283182	0	0	0	0	0	0.210724	0.237459	0.22215	0	0	0	0	0	0.0358042	0.0157084
269.131	C14H23O3P	1045.23	225952	1	0.0750428	0.06781	0.061203	0.649345	0.696242	0	0	0	0	0	0	0	0	0	0	0	0	0
269.139	C14H22O5	10499	274397	1	3.21807	3.61219	3.23095	6.51961	6.99352	4.71575	4.5309	4.46115	13.5151	12.3698	12.7268	12.7501	12.4837	15.0668	14.7651	14.0058	1.16898	1.22819
269.155	C18H22O2	2096.55	273452	1	2.71325	2.92445	2.65111	0.657284	0.68891	1.54001	1.67142	1.8456	2.75582	2.29899	2.66027	2.21887	2.74956	0.678618	0.795081	0.606414	1.1164	0.960333
269.176	C15H26O4	293.211	269298	1	0.0240188	0.0300668	0.0218009	0.0279854	0.0251676	0	0	0	0	0	0	0.180538	0.320452	0.135033	0.0960134	0.125333	0	0
269.191	C19H26O	143.307	268922	1	0.193629	0.19596	0.18363	0.00709023	0.0142816	0	0	0	0	0	0	0.0757911	0.0600887	0	0	0	0.0294584	0.023106
270.005	C13H5NO6	21.3678	232357	1	0	0	0	0	0	0.0443962	0.0446177	0	0.268993	0.304883	0.313054	0.073677	0.0605397	0	0	0	0	0
270.041	C14H9NO5	1133.47	268665	1	0.0202899	0.0395773	0.0235088	0	0	2.57516	2.78243	2.88069	16.4069	17.0368	15.8215	4.65846	4.54997	0.401257	0.566918	0.473489	0.0194429	0.0177469
270.044	C11H13NO5S	42.2065	196885	1	0	0	0	0	0	0	0	0	0.176901	0	0.393008	0.150213	0.138782	0	0	0	0.0132075	0.0113083
270.052	C13H9N3O4	617.27	167011	1	0.0621028	0.0721752	0.0722517	0	0	0	0	0	1.32966	1.42546	1.49891	0	0	0	0	0	0	0
270.062	C11H13NO7	400.194	268630	1	0.0137431	0.0214051	0.0192735	0.0493026	0.0645748	1.14946	1.21394	1.16189	1.8593	2.02123	2.21708	1.60494	1.30099	0.765523	0.764672	0.57041	0.0444124	0.0118519
270.077	C15H13NO4	1111.35	272294	1	0.413224	0.42334	0.477126	0.0245276	0.0501971	2.36101	2.21128	2.32913	15.0039	14.9777	14.953	5.39002	5.35238	0.215929	0.338361	0.245801	0.249017	0.265067
270.088	C14H13N3O3	123.938	172026	1	0	0	0	0	0	0	0	0	1.06808	1.14306	1.25917	0	0	0	0	0	0	0
270.098	C12H17NO6	2787.9	269233	1	0.235823	0.316075	0.247001	1.8135	1.80191	0.254021	0.13535	0.225712	1.15964	1.38588	1.82007	1.69048	1.83638	0.0968914	0.125362	0.146929	0.268355	0.289245
270.114	C16H17NO3	929.16	269695	1	0.592328	0.567995	0.557768	0.143239	0.135897	0.15971	0.208263	0.164863	3.42001	2.92421	2.78935	0.838993	0.843396	0	0	0	0.307201	0.317974
270.135	C13H21NO5	844.493	264269	1	0.0219753	0.0336827	0.0418915	0.482158	0.56253	0	0	0	0	0	0	0	0	0	0	0	0	0
270.15	C17H21NO2	168.047	266903	1	0.0437479	0.0519287	0.0454222	0.0224027	0.0181886	0	0	0	0	0	0	0	0	0	0	0	0.0268482	0.013309
270.992	C10H8O7S	249.441	263455	1	0	0	0	0	0	0.124364	0.0554637	0.103749	0.244045	0.295594	0.484577	0	0	0	0	0	0	0
271.007	C14H8O4S	127.973	242486	1	0	0	0	0	0	0.137939	0.245325	0.222328	0.496498	0.444602	0.245618	0.164567	0.137815	0	0	0	0	0
271.025	C14H8O6	4077.37	272898	1	0.0375287	0.0423456	0.0453646	0	0	18.2063	18.1272	18.9883	27.822	29.0287	28.3943	17.0249	18.4482	20.8138	20.4429	20.4078	0	0
271.028	C11H12O6S	1211.62	251374	1	0.0276873	0.0397665	0.0165609	0	0	0.367433	0.283483	0.299819	1.10529	1.05543	0.918479	0.279825	0.389973	0.096721	0.126158	0.166935	0	0
271.04	C18H8O3	71.0733	236933	1	0	0	0	0	0	0.170553	0.270919	0.221715	0.614519	0.836429	0.702743	0.458005	0.526801	0.110009	0.173357	0.128174	0	0
271.046	C11H12O8	4496.42	273020	1	0.12056	0.104643	0.15379	0.101193	0.0929387	19.8477	21.0903	20.9398	7.67047	8.16846	8.23791	6.30047	6.7237	25.5447	24.4403	24.7126	0.0460625	0.0255249
271.061	C15H12O5	5960.63	273082	1	1.7681	1.93663	1.78218	0.10812	0.111925	27.1615	27.9831	27.5497	40.1162	41.6215	41.3718	30.02	31.139	25.0992	23.9438	22.6563	0.669183	0.64859
271.065	C12H16O5S	19448.2	246726	1	1.45351	1.57454	1.41135	0.29747	0.292132	0.111871	0.15454	0.0820545	1.09406	1.0559	0.74825	6.35234	5.5371	0.0998451	0.12388	0.113313	0.0362158	0.0414473
271.072	C14H12N2O4	924.169	245937	1	0.17892	0.167931	0.161234	0.0164703	0.0061043	0.65182	0.516724	0.678567	12.418	13.015	13.0942	3.01678	3.4521	0.138238	0.164507	0.101314	0.201842	0.178221
271.076	C19H12O2	297.788	255507	1	0.0156697	0.0211605	0.0121141	0	0	1.30001	1.39801	1.0996	2.56028	2.21859	2.29973	1.108	1.2476	0.235508	0.240957	0.33734	0	0
271.082	C12H16O7	15516	275354	1	3.82939	4.12722	3.785	9.57396	10.3354	31.4467	32.0926	33.8833	22.4327	21.6767	22.7886	24.6413	25.9349	34.7708	34.4921	34.148	1.29551	1.26741
271.093	C11H16N2O6	65.7742	247715	1	0	0.0165548	0.0210974	0.0276224	0.0284788	0.096612	0	0.149582	0.328554	0.565552	0.437801	0.149747	0.151914	0	0	0	0	0
271.098	C16H16O4	4404.48	272482	1	5.60479	5.9583	5.6438	1.31931	1.41113	14.9443	15.4553	16.414	26.3366	26.0936	26.678	20.16	21.9825	11.0207	10.8695	10.1852	3.09315	3.01138
271.101	C13H20O4S	347.34	244471	1	0.0703649	0.0707081	0.0658484	0.0705203	0.0837582	0	0	0	0.122858	0.20121	0.31314	0.0920037	0.075743	0	0	0	0	0
271.109	C15H16N2O3	798.081	257869	1	0.277748	0.349196	0.289624	0	0	0.158165	0.125368	0.137781	4.31291	3.67623	4.14926	1.1229	0.896946	0	0	0	0.343004	0.328673
271.119	C13H20O6	13754.1	273663	1	3.28188	3.38872	3.36927	8.73525	9.1618	8.5926	8.95877	8.72986	15.8814	16.6428	16.2309	16.3228	17.0027	18.4265	18.0004	17.2509	1.52797	1.41537
271.134	C17H20O3	5031.06	273333	1	6.50867	6.83494	6.44668	1.83928	2.02902	7.74944	7.6725	7.76436	13.8636	13.6235	13.9901	10.7421	11.4592	4.90881	5.00585	4.65148	3.25057	3.25318
271.145	C16H20N2O2	62.3253	246844	1	0.0135395	0.0137109	0.0109843	0.00750759	0.0108566	0	0	0	0	0	0	0	0	0	0	0	0	0
271.155	C14H24O5	660.046	266459	1	0.0842347	0.0706914	0.082922	0.429353	0.408975	0	0	0	0.18489	0.222836	0	0.710634	0.590854	0.500488	0.73567	0.408006	0.0125914	0.0126281
271.17	C18H24O2	2005.67	271569	1	2.61399	2.69251	2.57002	0.600078	0.597561	0.96479	1.09909	1.06924	2.08644	2.42052	2.05826	2.27986	2.27109	0.505515	0.55516	0.452622	0.696568	0.735793
272.02	C13H7NO6	476.621	265941	1	0	0	0	0	0	0.851009	0.819639	0.717314	5.84653	6.17083	6.98285	1.08803	1.33072	0.154389	0.169954	0.164084	0	0
272.057	C14H11NO5	1443.25	272730	1	0.2142	0.182909	0.202059	0.0128714	0.00784454	4.05903	4.14421	4.3487	19.7703	21.0957	21.1447	6.76222	6.43355	0.918379	1.02226	1.04805	0.110799	0.107294
272.06	C11H15NO5S	39.877	177343	1	0	0	0	0.00885545	0.0142918	0	0	0	0.320709	0.242838	0.329114	0	0	0	0	0	0	0
272.068	C13H11N3O4	2232.4	194307	1	0.0417257	0	0.0313925	0.00887317	0.00841035	0	0	0	1.8521	1.89337	1.79606	0	0	0	0	0	0	0
272.072	C18H11NO2	95.6	226077	1	0	0.0137535	0.0118138	0	0	0.0909372	0.0807091	0.101311	1.0212	1.04946	1.40061	0.219089	0.222297	0	0	0	0	0
272.078	C11H15NO7	213.401	257026	1	0.0208095	0	0.0137313	0.0468973	0.0514875	0.198529	0.197868	0.133723	0.4804	1.04583	0.474704	0.372615	0.494054	0.111289	0.153518	0.0834965	0	0
272.093	C15H15NO4	1382.93	272694	1	1.04229	1.08136	1.0172	0.314084	0.343869	1.31183	1.48382	1.49062	12.4836	11.9486	11.0598	4.67994	4.88849	0.18435	0.228301	0.126019	0.877474	0.989925
272.104	C14H15N3O3	201.372	189200	1	0	0	0	0.013393	0.0161925	0	0	0	0.514292	0.538079	0.410911	0	0	0	0	0	0.0182356	0.022926
272.114	C12H19NO6	260.024	259663	1	0	0	0	0.154558	0.173206	0	0	0	0	0	0	0	0	0	0	0	0.0181535	0.0192579
272.129	C16H19NO3	959.85	268892	1	0.6006	0.644081	0.572504	0.295568	0.354083	0.0534789	0.0695577	0.0501638	0.847278	1.39966	1.25268	0.277818	0.397939	0	0	0	0.407642	0.322236
272.166	C17H23NO2	65.7794	261455	1	0.0136688	0.0143356	0.0232482	0.00966226	0.0155855	0	0	0	0	0	0	0	0	0	0	0	0	0
273.004	C13H6O7	1535.76	272840	1	0	0	0	0	0	6.81549	6.9925	7.15202	9.73941	9.74419	9.61542	5.21822	5.59561	9.16611	9.15693	9.56816	0	0
273.008	C10H10O7S	335.856	255481	1	0	0	0	0	0	0.125583	0.0835861	0.103511	0.586461	0.414673	0.53839	0.208252	0.228675	0.0988979	0.0990045	0	0	0
273.015	C12H6N2O6	61.5735	227395	1	0	0	0	0	0	0.164689	0.0748355	0.0991788	0.939672	0.632576	0.891712	0.119044	0.0767896	0	0	0	0	0
273.023	C14H10O4S	206.869	251870	1	0	0	0	0	0	0.837099	0.917429	0.724661	0.772769	1.29517	1.21426	0.786357	0.600563	0.602298	0.610708	0.653743	0	0
273.025	C10H10O9	819.803	257394	1	0	0	0	0	0	1.68294	1.88395	1.95117	0.325863	0.367928	0.257371	0.135241	0.107839	6.88698	6.44699	6.31258	0	0
273.041	C14H10O6	6573.33	271404	1	0.487035	0.602547	0.50657	0.0240447	0.0136036	28.5342	30.7976	30.612	41.9063	44.1331	42.1296	29.5725	29.9766	37.568	37.1878	36.4829	0.0659509	0.127842
273.044	C11H14O6S	2784.68	245021	1	0.104785	0.0785824	0.072404	0.0271087	0.0551667	0.256897	0.262575	0.236918	1.03401	1.23236	1.30769	0.439012	0.413748	0.154804	0.137981	0.0722122	0.0467969	0.0381043
273.052	C13H10N2O5	794.772	242406	1	0.0276277	0.0484294	0.0547874	0	0	0.631375	0.82606	0.787819	12.129	11.4471	11.2858	2.17721	1.96805	0.25977	0.461959	0.439003	0.0436932	0.0326928
273.056	C18H10O3	704.658	257863	1	0.017627	0.0139201	0	0	0	3.28455	3.30813	3.19533	6.14378	5.90116	7.16016	3.67714	3.934	1.41263	1.22788	1.25005	0	0
273.059	C15H14O3S	200.973	200241	1	0.0212531	0.0551526	0.0207245	0	0	0.820588	0.943501	0.704437	0.55728	0.783031	0.886364	0.521501	0.635033	0.433181	0.252377	0.277104	0	0
273.062	C11H14O8	3094.94	272075	1	0.0972729	0.117524	0.109602	0.509949	0.495846	13.5575	13.8063	14.4131	5.84375	5.72756	5.64311	5.77848	5.6366	17.5764	17.6152	17.0038	0.0362763	0.0612421
273.067	C17H10N2O2	54.9508	230378	1	0	0	0	0	0	0.0917865	0	0.0809813	0.454305	0.825945	0.730595	0	0	0	0	0	0	0
273.077	C15H14O5	5786.51	270623	1	4.41831	4.91214	4.63076	1.2804	1.39968	27.2066	26.791	26.9478	40.5142	42.0157	40.4761	34.3874	36.0225	26.0851	25.5718	24.1945	2.52843	2.46089
273.08	C12H18O5S	516.694	243701	1	0.0649413	0.100238	0.0800946	0.131065	0.142419	0.095638	0.108013	0.0905327	1.78502	1.60257	1.68861	0.226094	0.167804	0	0	0	0.0299753	0.0152515
273.088	C14H14N2O4	1235.84	261605	1	0.616643	0.627219	0.666109	0.167142	0.204203	0.507092	0.522351	0.576283	14.2973	14.4557	14.9173	4.22064	4.3049	0.0968724	0.114766	0.0882272	0.689479	0.582472
273.092	C19H14O2	362.722	266177	1	0.063662	0.0963513	0.0694381	0	0	1.62553	1.70286	1.49942	2.41707	2.1531	2.80516	1.31191	1.27945	0.457786	0.343012	0.455056	0	0
273.098	C12H18O7	4741.44	271639	1	1.07659	1.13194	1.09858	3.08426	3.09556	6.86951	6.8843	7.12089	6.88328	7.40823	8.01427	9.24392	10.1711	11.2897	11.1519	11.0226	0.281279	0.30278
273.113	C16H18O4	8006.82	269564	1	9.9995	11.1686	10.123	3.79703	4.1316	15.3018	15.6227	16	28.9561	28.4168	28.6278	22.369	24.3878	13.5574	13.0362	12.4248	5.30904	5.19467
273.124	C15H18N2O3	804.014	262840	1	0.363164	0.321808	0.329404	0.17811	0.193832	0.0510578	0.0416071	0	1.64065	1.5605	2.07448	0.523525	0.546258	0	0	0	0.431897	0.471337
273.134	C13H22O6	1116.09	261390	1	0.120305	0.094264	0.0936446	0.726003	0.695507	0.174343	0.0639823	0.0500332	0.508545	0.356511	0.498551	1.16691	1.19449	1.21832	1.30419	1.18633	0.0264943	0.018851
273.15	C17H22O3	5520.26	270321	1	7.15621	7.60096	7.07353	2.51348	2.55117	6.25933	6.31853	6.45348	13.9904	12.6771	13.2567	10.5605	11.3479	5.42054	4.85624	5.05576	3.05583	2.93223
273.186	C18H26O2	1035.49	267736	1	1.39759	1.40475	1.32685	0.216222	0.16559	0.23374	0.174096	0.219686	0.54636	0.757028	0.701555	0.653302	0.91323	0.154212	0.0966048	0.22946	0.202478	0.159116
273.999	C12H5NO7	33.6655	251155	1	0	0	0	0	0	0	0	0	0.318152	0.261704	0.493224	0.0642995	0.102793	0	0	0	0	0
274.036	C13H9NO6	958.419	265722	1	0	0.0243703	0.0103635	0	0	2.70848	2.6926	2.66979	13.5431	13.6346	14.0416	4.21849	3.92728	0.814868	0.994012	0.773703	0	0
274.047	C12H9N3O5	131.256	107844	1	0	0	0	0	0	0	0	0	1.27933	1.21796	1.28943	0	0	0	0	0	0	0
274.051	C17H9NO3	160.404	227341	1	0	0	0	0	0	0.17755	0.160058	0.25461	1.71202	2.41097	2.12899	0.306267	0.36871	0	0	0	0	0
274.072	C14H13NO5	1391.62	272474	1	0.67577	0.842283	0.756482	0.245176	0.240076	3.84732	3.8115	3.96998	18.8594	20.9169	19.6718	9.87129	9.38656	1.46205	1.0426	1.25623	0.736441	0.744496
274.083	C13H13N3O4	188.863	188163	1	0	0	0	0.0136193	0.0231104	0	0	0	2.34123	2.0739	2.50253	0.159109	0.209623	0	0	0	0.0386537	0.0279328
274.087	C18H13NO2	92.4799	239734	1	0	0.0112694	0.0155644	0	0	0.145411	0.141694	0.0728792	1.41133	1.18345	1.27814	0.218631	0.176799	0	0	0	0	0
274.109	C15H17NO4	1756.12	270919	1	1.60428	1.68309	1.6302	1.02782	1.04387	0.523386	0.570329	0.755394	7.48194	8.97493	8.38678	3.76583	3.87276	0.163333	0.100629	0.17268	1.71538	1.743
274.12	C14H17N3O3	77.1725	178813	1	0	0	0	0.0340399	0.0367962	0	0	0	0.135953	0	0.173869	0	0	0	0	0	0.0159181	0.0130058
274.145	C16H21NO3	722.374	267943	1	0.426733	0.362362	0.432923	0.303947	0.271384	0	0	0	0.431702	0.440645	0.277191	0.158867	0.172264	0	0	0	0.168065	0.192701
275.002	C13H8O5S	81.8172	240208	1	0	0	0	0	0	0.132914	0.0476967	0.122799	0.429183	0.401377	0.518362	0	0	0	0	0	0	0
275.017	C17H8O2S	21.993	222385	1	0	0	0	0	0	0.0676041	0.0601188	0.0822092	0.200036	0.330569	0	0.0885128	0.0744741	0	0	0	0	0
275.02	C13H8O7	3444.8	269928	1	0.0132644	0.0273075	0.0261831	0	0	15.9561	15.7719	16.0424	20.6462	20.9664	20.937	13.6677	14.2849	26.5802	25.3807	25.219	0	0
275.023	C10H12O7S	347.971	248871	1	0	0	0	0	0	0.166833	0.102933	0.117641	1.19505	1.54752	1.1598	0.148162	0.232746	0.161473	0.102505	0.164843	0	0
275.031	C12H8N2O6	238.557	235977	1	0	0	0	0	0	0.18254	0.21927	0.212349	2.60917	3.0493	3.49504	0.467291	0.275416	0.0741998	0.147873	0.18265	0	0
275.035	C17H8O4	518.502	266284	1	0	0	0	0	0	2.35797	2.16364	2.41466	4.84935	5.16297	5.42041	3.38417	3.65866	1.992	1.72149	1.55705	0	0
275.041	C10H12O9	226.951	232499	1	0	0	0	0	0	0.831743	0.906191	0.856986	0.276542	0.329977	0.271848	0.186056	0.127766	1.81669	1.649	1.48041	0	0
275.046	C16H8N2O3	59.9631	234893	1	0	0	0	0	0	0	0	0	0.915096	0.890619	0.869585	0	0	0	0	0	0	0
275.056	C14H12O6	7623.28	270455	1	2.17757	2.28151	2.24186	0.398107	0.435064	34.969	35.7887	35.3515	44.8354	46.0885	45.8185	39.1492	40.9058	46.7995	44.5106	44.5482	0.892383	0.863226
275.059	C11H16O6S	1301.28	245651	1	0.0637766	0.0742566	0.0583156	0.216372	0.245864	0.379	0.391755	0.422033	4.73789	5.15042	5.52835	0.850594	1.09934	0.149385	0.122155	0.211062	0.119454	0.105191
275.067	C13H12N2O5	1046.96	260792	1	0.268144	0.239025	0.249382	0.0377826	0.0594161	1.17774	0.924805	1.04422	14.4298	14.4762	15.3388	4.70339	4.7479	0.43115	0.410585	0.293839	0.299643	0.347843
275.071	C18H12O3	1474.3	269507	1	0.11496	0.124093	0.137084	0	0	7.20917	6.77324	6.86579	12.5985	11.2277	10.9877	6.82244	8.15113	3.38114	3.20306	2.52149	0	0
275.075	C15H16O3S	264.59	200260	1	0.107047	0.0958724	0.113956	0	0	0.282969	0.271405	0.279772	0	0	0	0.447267	0.387647	0.0954455	0.0714835	0.186831	0	0
275.077	C11H16O8	808.033	256178	1	0.0241971	0.0146465	0	0.0634895	0.0598858	1.91959	1.90399	1.85274	1.02444	1.00114	0.796477	1.01936	1.04002	3.49174	3.61907	3.15804	0.0313106	0.0327458
275.083	C17H12N2O2	92.8243	230203	1	0	0	0	0	0	0	0	0	1.32906	1.03934	1.35995	0.118093	0.154597	0	0	0	0	0
275.093	C15H16O5	7960.26	267408	1	10.2043	10.952	10.2001	5.07248	5.24195	26.7297	27.6943	26.9303	43.072	43.7855	44.0216	39.4829	40.0147	29.05	27.6923	28.5169	5.74881	5.59234
275.096	C12H20O5S	514.373	253631	1	0.0577305	0.0267637	0.0423588	0.0522306	0.0632717	0	0	0	1.74943	2.31074	2.03872	0.122902	0.230497	0	0	0	0.0145911	0.0165251
275.104	C14H16N2O4	1389.47	262708	1	0.826075	1.01353	1.00761	0.710798	0.739318	0.399211	0.405333	0.361352	9.15713	9.87322	9.13805	2.76741	2.90427	0.121146	0.103842	0.0936102	1.60255	1.53869
275.108	C19H16O2	266.819	263360	1	0.172938	0.201012	0.139904	0	0	1.22697	1.24027	1.24257	1.43193	1.4876	1.36855	0.615647	1.12172	0.216194	0.177969	0.203363	0	0
275.114	C12H20O7	470.743	245111	1	0.0192173	0.0133752	0	0.0977146	0.103479	0	0	0	0.127802	0.205261	0	0.382999	0.256479	0.379181	0.677449	0.569228	0	0
275.129	C16H20O4	11784.4	269807	1	13.5932	14.7027	13.6381	7.66565	7.77397	14.7564	15.5055	15.471	29.5865	32.3725	30.9696	24.6934	25.4121	14.6327	13.8058	14.1374	6.7261	6.51268
275.14	C15H20N2O3	298.785	264477	1	0.153256	0.161521	0.129658	0.184056	0.175246	0	0	0	0	0	0	0	0	0	0	0	0.148975	0.150763
275.165	C17H24O3	3589.15	270690	1	4.63559	4.80148	4.59906	1.82539	1.85548	3.4593	3.07528	3.2847	8.88754	8.77574	8.74851	6.72526	6.77118	2.4148	2.48816	2.14812	1.65394	1.66982
275.202	C18H28O2	111.461	259498	1	0.127783	0.155475	0.108029	0.0119371	0.00963219	0	0	0	0	0	0	0.0706073	0.090692	0	0	0	0	0
275.997	C12H7NO5S	21.6632	253354	1	0	0	0	0	0	0	0	0	0.320758	0.252708	0.317383	0.157328	0.080291	0	0	0	0	0
276.015	C12H7NO7	168.889	257962	1	0	0	0	0	0	0.320744	0.274135	0.433917	2.11955	2.32563	2.47434	0.356389	0.390756	0.191025	0.153832	0.166055	0	0
276.03	C16H7NO4	75.677	205584	1	0	0	0	0	0	0.066721	0.104375	0.0500465	0.689151	1.13747	0.942069	0.0759946	0.0920177	0	0	0	0	0
276.034	C13H11NO4S	50.9889	218757	1	0	0	0	0	0	0	0	0	0.453907	0.450607	0.747026	0.199225	0.19384	0	0	0	0	0
276.051	C13H11NO6	1139.08	271402	1	0.107289	0.122005	0.105511	0.0187079	0.0209375	3.71943	3.92031	4.24168	16.6739	17.121	16.1124	7.73159	7.46691	2.17824	1.72518	1.89941	0.159231	0.101976
276.063	C12H11N3O5	143.601	171605	1	0	0	0	0.00797251	0.00647807	0	0.0647383	0.0501929	1.91439	2.15842	1.81095	0	0	0	0	0	0	0
276.067	C17H11NO3	474.895	249610	1	0.0121363	0.0168668	0	0	0	0.694944	0.67586	0.769955	5.72693	6.09489	6.95757	1.17594	1.29683	0	0	0	0	0
276.078	C16H11N3O2	19.8441	99529.1	1	0	0	0	0	0	0	0	0	0.302841	0.134868	0.250189	0	0	0	0	0	0	0
276.088	C14H15NO5	2050.72	272337	1	1.65295	1.83692	1.62657	1.25393	1.36601	3.26826	3.22217	3.10877	18.1621	17.6933	18.2973	9.38289	10.642	0.976495	1.03633	0.988376	2.26378	2.12864
276.099	C13H15N3O4	154.747	218599	1	0	0	0	0.0565263	0.0505044	0	0	0	1.14063	1.52611	1.74347	0.104194	0.143666	0	0	0	0.0476515	0.0472404
276.103	C18H15NO2	73.8198	239523	1	0.015446	0.0150063	0.011106	0	0	0.0748708	0.0547342	0	0.658403	0.713502	0.652348	0	0	0	0	0	0	0
276.124	C15H19NO4	2365.44	265445	1	1.49312	1.791	1.50384	1.46769	1.57566	0.293059	0.178391	0.216455	4.39368	4.10773	3.74726	1.68821	2.4991	0	0	0	1.56288	1.53837
276.135	C14H19N3O3	31.9622	166526	1	0.0139883	0	0.0139847	0.0207911	0.0128066	0	0	0	0	0	0	0	0	0	0	0	0.0246538	0.0240172
276.161	C16H23NO3	181.082	263208	1	0.118385	0.0870639	0.104777	0.0846519	0.0776398	0	0	0	0	0	0	0	0	0	0	0	0.0343222	0.0140131
276.999	C12H6O8	818.834	262523	1	0	0	0	0	0	3.20655	3.39688	3.81331	2.17675	2.65212	2.10434	1.45193	1.30015	5.79533	6.03421	5.62971	0	0
277.002	C9H10O8S	19.3365	243693	1	0	0	0	0	0	0	0	0	0.183306	0.29064	0	0	0	0	0	0	0	0
277.014	C16H6O5	135.677	254700	1	0	0	0	0	0	0.501798	0.622595	0.531534	0.859708	1.52302	1.03719	0.771382	1.00565	0.652268	0.594187	0.505695	0	0
277.018	C13H10O5S	328.502	244750	1	0	0	0	0	0	0.364469	0.440242	0.460842	0.885128	0.961219	0.841616	0.354008	0.393327	0.47358	0.344097	0.240695	0	0
277.033	C17H10O2S	23.5378	214822	1	0	0	0	0	0	0	0.0562807	0.0836195	0.252821	0.188966	0.344847	0.111218	0.0781568	0.0775422	0.063061	0.0869995	0	0
277.035	C13H10O7	6282.89	269060	1	0.260368	0.319397	0.202455	0.0131669	0.00909618	25.5913	25.257	27.9359	30.2577	29.8828	29.8243	25.1512	27.2648	49.0485	49.6925	46.8215	0.0487779	0.088872
277.039	C10H14O7S	435.188	244762	1	0	0	0	0.00790246	0.00857498	0.351221	0.398139	0.54084	6.23733	6.54114	5.68029	0.37184	0.48311	0.279632	0.182094	0.207654	0.0235213	0.0156467
277.047	C12H10N2O6	470.282	252894	1	0.0202901	0.0161663	0.0142236	0	0	0.712602	0.571892	0.717344	6.53057	7.06863	6.5937	1.83914	1.5335	0.319337	0.279736	0.264397	0.0570708	0.0479013
277.051	C17H10O4	2446.54	270902	1	0.0809799	0.0608474	0.089503	0	0	10.6802	10.9541	11.3935	19.8215	19.9312	20.4162	11.8979	12.508	7.93272	7.71045	7.76742	0	0
277.057	C10H14O9	41.3944	185744	1	0	0	0	0	0	0.0774186	0.100359	0.0878462	0	0	0	0	0	0.275282	0.173056	0.195207	0	0
277.069	C18H14OS	84.1716	209086	1	0	0	0	0.0480817	0.056068	0	0	0	0	0	0	0.0815964	0.0604832	0	0	0	0	0
277.072	C14H14O6	8137.5	268897	1	7.12793	7.5465	7.35052	5.14496	5.28584	36.2729	38.0156	37.8963	46.2211	49.0195	46.8488	46.934	46.8712	49.9877	49.2685	50.2552	3.17902	3.17022
277.075	C11H18O6S	761.276	233031	1	0.0477817	0.0505497	0.0584241	0.06263	0.0749641	0.256442	0.0955517	0.193376	1.40098	1.07765	1.07199	0.671035	0.434025	0.267977	0.254656	0.203887	0.0291732	0.0236403
277.083	C13H14N2O5	1164.11	265909	1	0.595431	0.700167	0.591273	0.46279	0.476394	0.87698	0.979286	1.10173	13.6316	14.1056	14.5469	4.99538	5.17862	0.245214	0.402057	0.277818	1.05022	0.87117
277.087	C18H14O3	1450.12	271010	1	0.488901	0.462795	0.484194	0.00681641	0.00548125	6.66366	6.70662	6.75322	9.99939	9.50087	10.0341	6.72629	6.88755	2.5312	2.22161	2.356	0.0485952	0.0602946
277.093	C11H18O8	26.2132	152159	1	0	0	0	0	0	0	0	0	0	0	0	0	0	0	0	0	0.0145188	0.0187772
277.108	C15H18O5	26939.2	269853	1	17.8501	19.7866	18.0803	16.9646	17.9446	29.7074	29.9799	30.6835	53.5519	53.0125	53.8967	46.0401	49.2007	40.193	41.3861	38.9857	9.43342	9.19625
277.112	C12H22O5S	276.187	263051	1	0.0126596	0	0.0106549	0	0	0	0	0	1.66806	1.99581	1.75154	0	0	0	0	0	0	0
277.119	C14H18N2O4	1740.47	263960	1	0.775277	0.790093	0.777438	1.13216	1.15312	0.0588204	0.0517867	0.06871	2.78031	3.32072	2.85991	1.07845	1.02853	0	0	0	1.83103	1.82297
277.123	C19H18O2	392.204	264607	1	0.500296	0.542973	0.43851	0.0110445	0.0126349	0.72383	0.770048	0.820794	1.1154	0.998694	1.19951	0.684939	0.602183	0.191532	0.0973725	0.108226	0.0605578	0.0615491
277.145	C16H22O4	12435.4	268161	1	11.8125	12.0732	11.6808	8.0891	8.19347	11.0781	10.9138	10.6345	24.7333	25.3448	25.4161	19.7432	20.2423	11.7397	10.9908	11.343	5.01148	4.89544
277.156	C15H22N2O3	50.2795	264643	1	0	0	0	0.0238231	0.0334919	0	0	0	0	0	0	0	0	0	0	0	0	0
277.16	C20H22O	54.4036	258357	1	0.075719	0.0747282	0.0554271	0	0	0	0	0	0	0	0	0	0	0	0	0	0	0
277.181	C17H26O3	1306.88	267893	1	1.6054	1.82295	1.57845	0.766907	0.750548	0.55761	0.587606	0.486275	2.14459	1.65385	1.77118	1.47023	1.51494	0.672122	0.691525	0.5885	0.247323	0.24057
278.031	C12H9NO7	537.999	263048	1	0	0	0	0	0	1.05103	0.973395	1.28482	4.65537	5.43639	5.10601	1.69792	1.88664	0.645758	0.830611	0.698238	0	0
278.046	C16H9NO4	566.397	258990	1	0	0	0	0	0	0.973266	1.09334	1.14638	8.63167	8.5133	8.25389	1.98343	1.61078	0.0966977	0.0690971	0.107466	0	0
278.049	C13H13NO4S	47.7308	206616	1	0.0198018	0.0135677	0.0143247	0	0	0	0	0	0	0.717423	0.35926	0.0931613	0.125801	0	0	0	0	0
278.067	C13H13NO6	1293.59	270910	1	0.640423	0.666111	0.676729	0.509964	0.529084	4.46929	4.74473	4.90304	17.0845	17.6838	18.1503	9.60313	9.58818	2.29766	2.7019	2.48518	0.879092	0.95705
278.078	C12H13N3O5	112.025	161002	1	0	0	0	0.0196192	0.0295909	0	0	0	1.64097	1.64386	1.64125	0	0	0	0	0	0	0
278.082	C17H13NO3	380.743	263086	1	0.0204218	0.0649331	0.0334394	0	0	0.526469	0.644911	0.548478	4.95069	5.72281	5.34982	1.00583	1.10408	0	0	0	0	0
278.094	C16H13N3O2	17.2885	116117	1	0	0	0	0	0	0	0	0	0.236236	0.148123	0.25329	0	0	0	0	0	0	0
278.103	C14H17NO5	4709.16	269385	1	2.02436	2.31474	2.17074	2.9249	3.13685	1.39871	1.60341	1.47057	12.4184	12.7935	11.8658	8.06973	8.18642	0.777932	0.774753	0.570873	3.45602	3.42706
278.115	C13H17N3O4	139.106	213469	1	0.0386414	0.0379561	0	0.0904871	0.0882649	0	0	0	0.402619	0.618897	0.519775	0	0	0	0	0	0.0234616	0.046853
278.119	C18H17NO2	74.4657	247274	1	0.0335488	0.0173058	0.0255317	0	0	0	0	0	0.383341	0.367664	0.188975	0	0	0	0	0	0	0
278.14	C15H21NO4	1792.74	265351	1	0.712822	0.821385	0.766801	1.14415	1.19417	0.0490913	0.0658326	0.0425679	0.85438	0.962797	0.830536	0.77637	0.980692	0	0	0	0.621739	0.479267
278.997	C12H8O6S	83.4968	248944	1	0	0	0	0	0	0.0790397	0	0.150154	0.420451	0.335158	0.335322	0.0905425	0.0989622	0.0718605	0.0711227	0	0	0
279.012	C16H8O3S	35.3331	230614	1	0	0	0	0	0	0.0568734	0.0626976	0.0488734	0.302505	0.398409	0.517656	0.10024	0.087293	0.0685057	0	0.0856959	0	0
279.015	C12H8O8	3044.92	267490	1	0	0	0	0	0	9.21225	9.52722	10.0046	7.77863	8.47205	7.86957	9.78894	9.28371	22.5517	22.6942	23.7501	0	0
279.018	C9H12O8S	40.744	212237	1	0	0	0	0	0	0	0.0648301	0.0847835	0.41236	0.612407	0.315663	0	0	0	0	0	0	0
279.026	C11H8N2O7	58.7011	222966	1	0	0	0	0	0	0.153798	0.123997	0.0601194	0.895836	0.540063	0.619276	0.141823	0.160195	0	0.121849	0.12151	0	0
279.03	C16H8O5	2220.65	265741	1	0	0	0	0	0	9.17321	9.67225	10.3416	16.6156	16.9483	17.5972	10.1807	10.3147	9.35731	9.21606	9.17652	0	0
279.033	C13H12O5S	813.355	249653	1	0.152249	0.194261	0.174556	0	0	0.595265	0.697103	0.611128	1.54719	2.23184	1.73534	0.541392	0.553729	0.584918	0.612504	0.48627	0	0
279.049	C17H12O2S	43.6251	217681	1	0	0	0	0	0	0.216504	0.160028	0.1304	0.188358	0.182627	0.251165	0.140093	0.166304	0.0812655	0	0.068839	0	0
279.051	C13H12O7	7930.87	269460	1	1.47124	1.72783	1.57578	0.675802	0.706475	34.803	36.312	36.934	31.2693	34.0836	31.9101	32.8035	32.9082	60.1009	59.3876	61.5783	0.594662	0.615184
279.054	C10H16O7S	755.717	244397	1	0.0125482	0.0176278	0.0108824	0	0	0.383066	0.377055	0.321597	10.6746	11.3589	10.8578	0.649698	0.646918	0.463036	0.386225	0.308688	0.0223424	0.0222765
279.062	C12H12N2O6	588.853	260389	1	0.058209	0.0894951	0.0837334	0.0412833	0.047596	1.05757	1.06715	1.04712	7.78027	8.65835	8.62714	2.78405	2.95502	0.354583	0.301913	0.455002	0.0749169	0.106351
279.066	C17H12O4	3018.05	270493	1	0.480468	0.521601	0.426608	0	0	12.9961	13.5493	14.0551	21.9747	22.6023	22.3928	14.5446	14.6047	8.4155	8.49558	8.0814	0.0572359	0.0734218
279.07	C14H16O4S	583.597	209078	1	0.384755	0.419139	0.335865	0	0	0.189644	0.208632	0.20111	0.785066	1.15019	1.12955	0.590656	0.552099	0.211487	0.163803	0.112729	0	0
279.077	C16H12N2O3	322.405	227694	1	0.0268994	0.0222942	0.0115035	0	0	0.285029	0.236513	0.350354	4.92022	4.33094	4.06606	0.62954	0.776857	0	0	0	0	0
279.087	C14H16O6	27458.8	268113	1	13.401	14.1195	13.7501	17.8002	18.2907	42.6977	45.351	44.4894	51.6709	54.0064	54.7417	54.1067	54.9235	56.6715	55.4864	54.3855	6.72562	6.62081
279.091	C11H20O6S	422.827	249826	1	0.0315775	0	0.0123795	0	0	0	0	0	0.578951	0.553936	0.646058	0.107978	0.11064	0.140867	0.0665435	0.0696473	0	0
279.099	C13H16N2O5	2243.62	266146	1	0.948861	0.977174	1.01198	1.45945	1.45182	0.359876	0.441609	0.442394	7.63373	8.1344	8.10976	3.34095	3.31746	0.320186	0.261094	0.219512	1.70539	1.65621
279.103	C18H16O3	1184.83	270602	1	1.1697	1.39926	1.23892	0.0403086	0.0349909	5.00101	5.48011	5.51774	8.06444	7.19964	9.44781	5.88319	6.00938	1.70743	1.46545	1.23643	0.299756	0.264178
279.106	C15H20O3S	320.622	207251	1	0.24469	0.211859	0.216744	0	0	0.0498065	0.0975583	0	0	0	0	0	0	0	0	0	0	0
279.108	C11H20O8	14.6375	154896	1	0	0	0	0	0	0	0	0	0	0	0	0	0	0	0	0	0.0147306	0.0201568
279.114	C17H16N2O2	65.0471	224274	1	0	0	0	0	0	0	0	0	0.34619	0.53559	0.277921	0	0	0	0	0	0	0
279.124	C15H20O5	46996.9	268572	1	20.9258	21.9557	21.3493	30.5711	31.0598	29.3332	30.2954	29.1781	57.1321	57.085	57.142	48.2724	49.6065	52.9073	51.0359	50.7659	9.24386	9.1757
279.135	C14H20N2O4	854.217	263556	1	0.256497	0.198282	0.209487	0.55566	0.554672	0	0	0	0.148594	0.180367	0.25196	0.0938852	0.161169	0	0	0	0.531028	0.576762
279.139	C19H20O2	816.131	264528	1	0.956034	1.01213	0.95536	0.0252806	0.044218	0.708383	0.785506	0.666141	0.901861	0.808726	1.16265	1.00181	0.763645	0.159471	0.0958213	0.086108	0.162319	0.177567
279.16	C16H24O4	5403.92	268780	1	5.04444	5.31246	5.059	3.49601	3.59964	3.3756	3.43588	3.18612	11.4033	10.4654	10.2248	10.1958	10.0285	4.99792	5.05708	4.7427	1.98126	1.90734
279.164	C13H28O4S	103.279	257967	1	0	0	0	0.0355147	0.0687956	0	0	0	0	0	0	0	0	0.152527	0.296256	0.211223	0	0
279.197	C17H28O3	66.3941	259966	1	0.0537301	0.0926121	0.0609442	0.0116057	0.00595867	0	0	0	0	0	0	0	0	0	0	0	0	0
279.233	C18H32O2	2385.26	268704	1	0	0	0	0	0	0	0	0	0	0	0	8.73287	7.41603	0	0	0	0	0
279.992	C11H7NO6S	23.7692	246848	1	0	0	0	0	0	0	0	0	0.281614	0.357266	0.280434	0	0	0	0	0	0	0
280.01	C11H7NO8	36.127	211153	1	0	0	0	0	0	0	0	0	0.264788	0.428042	0.318611	0	0	0	0.0694839	0.0755847	0	0
280.025	C15H7NO5	326.549	256654	1	0	0	0	0	0	0.563462	0.454885	0.498299	4.1741	3.9248	4.78419	0.781421	1.01013	0.115779	0.101339	0.0930027	0	0
280.029	C12H11NO5S	56.7912	208948	1	0	0	0	0	0	0	0	0	0.731171	0.442413	0.564471	0.160123	0.210249	0	0	0	0	0
280.046	C12H11NO7	985.339	266116	1	0.0180896	0.035182	0.0184706	0.00533011	0.00560069	2.53739	2.46213	2.30052	6.80811	7.34763	6.67929	3.69449	3.80158	1.93049	1.66016	1.61967	0.0460514	0.0282373
280.058	C11H11N3O6	88.8202	132754	1	0	0	0	0	0	0	0	0	0.800152	1.17293	1.30128	0.0708935	0.0666793	0	0	0	0	0
280.062	C16H11NO4	868.84	261491	1	0.0374062	0.0190369	0.0361733	0	0	1.58058	1.97218	1.73896	11.6259	12.8106	12.7292	3.17785	3.33871	0.208247	0.232553	0.128704	0	0
280.083	C13H15NO6	3700.72	271268	1	1.2564	1.58446	1.43659	2.37162	2.4651	3.55909	3.83184	3.68336	14.0641	15.0315	14.8324	9.36993	10.2422	2.45991	2.17401	2.31363	2.05279	2.00865
280.094	C12H15N3O5	129.388	185875	1	0	0	0	0.0841657	0.0810186	0	0	0	0.708589	0.696509	0.63125	0	0	0	0	0	0.0198045	0.0142999
280.098	C17H15NO3	361.788	263830	1	0.120961	0.131155	0.132216	0	0	0.338937	0.355377	0.283306	2.96672	3.05512	3.2322	0.758901	0.732222	0	0	0	0.0433171	0.0329891
280.119	C14H19NO5	5745.97	266153	1	1.60718	1.68917	1.60597	3.5069	3.82748	0.342121	0.207841	0.286798	3.48812	4.10156	4.00436	3.14245	3.37752	0.181559	0.0872445	0.107698	2.49131	2.38876
280.13	C13H19N3O4	79.4515	233280	1	0	0	0	0.0516824	0.0443534	0	0	0	0	0	0	0	0	0	0	0	0	0
280.134	C18H19NO2	118.679	264795	1	0.0427078	0.0388799	0.0514013	0	0	0	0	0	0	0	0	0	0	0	0	0	0	0
280.155	C15H23NO4	509.31	262352	1	0.069831	0.0777118	0.07522	0.331301	0.318333	0	0	0	0	0	0	0	0	0	0	0	0.0292834	0.0143345
280.994	C11H6O9	94.9797	244825	1	0	0	0	0	0	0.25798	0.211124	0.369645	0	0.170501	0.167215	0	0	0.635129	0.718027	0.535209	0	0
281.009	C15H6O6	843.321	263670	1	0	0	0	0	0	3.92848	3.70517	3.92734	4.78513	4.31635	4.88708	3.54711	3.46454	4.32828	4.6999	4.40325	0	0
281.013	C12H10O6S	332.535	250810	1	0	0	0	0	0	0.270246	0.280987	0.2589	1.03394	1.14098	0.843895	0.276501	0.323021	0.198653	0.106385	0.233065	0	0
281.028	C16H10O3S	73.7071	212836	1	0	0	0	0	0	0.243246	0.31614	0.343254	0.337411	0.379066	0.646718	0.301717	0.255458	0.17042	0.13375	0.12593	0	0
281.03	C12H10O8	5367.36	266015	1	0.0254418	0.0246125	0.0410061	0	0	17.8521	17.8388	18.2324	13.5258	12.542	12.7827	13.4822	13.5705	41.8764	42.4514	41.1414	0	0
281.041	C11H10N2O7	98.6468	246042	1	0	0	0	0	0	0.347097	0.396224	0.414982	1.35322	1.48272	1.05553	0.476279	0.541722	0.212845	0.143924	0.22513	0	0
281.046	C16H10O5	3833.74	266014	1	0.127672	0.179451	0.181928	0	0	17.4346	17.9981	17.7787	27.6716	28.9922	29.0194	18.4861	18.2216	14.4223	14.0601	14.3848	0.0158427	0.0319675
281.049	C13H14O5S	1586.19	236889	1	0.541469	0.597708	0.535501	0.00736668	0.0210732	0.276089	0.447995	0.388092	1.21234	1.6345	1.32255	0.601263	0.820189	0.307672	0.246726	0.305762	0	0
281.067	C13H14O7	10487.6	266823	1	5.03838	5.31792	5.19355	6.187	6.17967	45.9996	49.2358	47.8581	34.9937	37.5419	36.0139	39.0522	38.8005	63.8407	61.877	62.8558	2.14392	2.09249
281.078	C12H14N2O6	640.946	261536	1	0.134792	0.222499	0.198302	0.416929	0.420415	0.542603	0.859273	0.83995	6.17316	6.04246	6.71577	2.48031	2.56033	0.38099	0.229648	0.131709	0.299199	0.283099
281.082	C17H14O4	2862.41	270546	1	1.49689	1.68613	1.53378	0.0259233	0.0248654	12.9319	12.8445	13.3302	21.0269	21.4825	21.6063	15.16	15.933	7.70855	7.96481	7.49707	0.443812	0.548398
281.093	C16H14N2O3	341.261	227912	1	0.07866	0.0620294	0.0718993	0	0	0.111379	0.101091	0.0991	3.14474	4.24643	4.16828	0.670367	0.731783	0	0	0	0.0483375	0.0133294
281.103	C14H18O6	73246.2	267648	1	19.7308	21.6292	19.8948	45.3153	48.7904	49.4906	50.8351	53.7134	57.7468	63.0664	60.5868	62.4938	63.8753	66.4274	66.7091	65.8045	9.32834	9.21877
281.114	C13H18N2O5	2018.71	260648	1	0.399425	0.465949	0.443837	1.28522	1.3447	0.105399	0.0902954	0.0623575	1.4369	1.77586	1.88764	0.832256	0.738579	0	0	0	1.14348	1.14494
281.118	C18H18O3	1898.11	266695	1	2.40917	2.4724	2.40663	0.139971	0.162185	4.7862	5.04926	4.91989	7.96619	8.22703	7.24336	5.93157	5.75961	1.63959	1.44223	1.44867	0.958924	0.989141
281.139	C15H22O5	29040.1	265433	1	11.752	12.5067	11.8044	18.2359	19.3441	15.1968	14.7248	14.9473	35.2133	35.0161	35.444	30.5188	33.3376	37.1441	35.4238	33.4811	4.91733	4.79529
281.151	C14H22N2O4	81.8326	254060	1	0.0188632	0.0200984	0	0.0477847	0.05451	0	0	0	0	0	0	0	0	0	0	0	0.022966	0.0274034
281.155	C19H22O2	1190.69	263955	1	1.40873	1.57674	1.48291	0.141013	0.17665	0.830821	0.64147	0.836036	1.14889	1.3128	1.02028	1.21635	1.19221	0.211296	0.231472	0.0969307	0.359403	0.333284
281.176	C16H26O4	868.878	265083	1	0.824537	0.797483	0.741661	0.565197	0.556826	0.0432531	0.0669112	0.0787146	0.587284	1.05252	0.717153	1.00408	1.13024	0.506643	0.410282	0.245299	0.0641299	0.0748007
281.249	C18H34O2	3392.76	265501	1	0	0	0	0	0	0	0	0	0	0	0	13.3876	12.0467	0	0	0	0	0
282.005	C14H5NO6	34.9684	233022	1	0	0	0	0	0	0.0399401	0	0.0483019	0.480202	0.525596	0.287839	0.0666783	0.0744149	0	0	0	0	0
282.008	C11H9NO6S	37.4253	229615	1	0	0	0	0	0	0	0	0	0.447306	0.4228	0.320718	0.0711989	0.112301	0	0	0	0	0
282.026	C11H9NO8	214.884	246580	1	0	0	0	0	0	0.149134	0.137662	0.188368	0.551404	0.280706	0.516243	0.202334	0.27098	0.170395	0.182512	0.207253	0	0
282.041	C15H9NO5	864.654	262489	1	0	0	0	0	0	1.85155	1.6907	2.14926	11.5848	12.9963	11.8962	3.37744	2.67696	0.348346	0.204926	0.354019	0	0
282.044	C12H13NO5S	76.2689	194491	1	0	0	0	0	0	0	0	0	0.305829	0.564357	0.490383	0.0951161	0.250523	0	0	0	0	0
282.062	C12H13NO7	850.286	269219	1	0.144055	0.178435	0.119917	0.287417	0.326119	3.41594	3.47051	3.76052	7.38253	6.48317	7.64159	5.0258	4.66945	1.9478	1.85762	1.97599	0.155841	0.140808
282.073	C11H13N3O6	113.72	178721	1	0	0	0	0	0	0	0	0	1.45281	1.35006	1.66608	0	0	0	0	0	0	0
282.077	C16H13NO4	797.736	266389	1	0.159551	0.213277	0.183185	0	0	1.70679	1.74451	1.84934	12.1742	11.3154	11.3564	3.69847	3.63313	0	0.0995549	0.20701	0.112926	0.0934923
282.088	C15H13N3O3	104.943	111996	1	0	0	0	0	0	0	0	0	0.813812	0.832278	0.576937	0	0	0	0	0	0	0
282.098	C13H17NO6	6857.41	267678	1	1.454	1.64636	1.54519	4.46068	4.42057	1.15754	1.31996	1.50267	7.32072	7.72529	7.8588	6.13298	6.26042	0.947563	1.12356	0.83705	2.21687	2.24134
282.11	C12H17N3O5	126.749	199642	1	0.0126565	0.0248295	0.034081	0.082449	0.0805646	0	0	0	0.231897	0.368118	0.32107	0	0	0	0	0	0.0182077	0.025202
282.114	C17H17NO3	514.282	263736	1	0.282725	0.328323	0.279909	0.0276546	0.0411329	0.171631	0.136322	0.095768	1.95343	2.22632	1.78082	0.484079	0.320797	0	0	0	0.0825114	0.107868
282.135	C14H21NO5	2357.97	262186	1	0.356205	0.427203	0.338778	1.47783	1.57068	0	0	0	0.187992	0.479212	0.661289	0.287762	0.328927	0	0	0	0.451297	0.372336
282.15	C18H21NO2	99.7682	260948	1	0.0231687	0.0262773	0.0511787	0	0	0	0	0	0	0	0	0	0	0	0	0	0	0
282.171	C15H25NO4	29.5238	253776	1	0	0	0	0.0192049	0.0168873	0	0	0	0	0	0	0	0	0	0	0	0	0
282.992	C11H8O7S	135.701	251838	1	0	0	0	0	0	0.0861497	0.0620529	0.161998	0.442144	0.660538	0.482364	0	0	0	0	0	0	0
283.007	C15H8O4S	34.6954	204046	1	0	0	0	0	0	0.076928	0.0659053	0.0611828	0.396736	0.273206	0.508314	0	0	0	0	0	0	0
283.01	C11H8O9	1299.91	255814	1	0	0	0	0	0	2.09419	2.32572	2.19527	0.674649	1.0939	0.999906	3.76465	3.40397	9.20298	9.42173	10.1392	0	0
283.025	C15H8O6	2975.52	265039	1	0.0119028	0.0117726	0.0156813	0	0	13.3054	13.8229	13.857	20.4312	21.0419	20.4977	12.1416	12.2981	14.2462	13.7961	13.5509	0	0
283.028	C12H12O6S	1333.03	244829	1	0.0413998	0.0283139	0.0418843	0	0	0.339554	0.304815	0.455912	1.59066	1.17532	1.22686	0.333737	0.474022	0.212774	0.147295	0.207841	0.0176188	0.0297287
283.046	C12H12O8	7468.51	266581	1	0.44647	0.494309	0.474432	0.473085	0.436383	33.4094	35.0621	34.2797	15.8095	16.508	16.0335	14.214	13.6098	42.3322	40.0443	40.7636	0.0859281	0.0720558
283.057	C11H12N2O7	122.59	240944	1	0	0	0	0	0	0.608392	0.47315	0.493069	1.1921	1.24317	1.23985	0.825437	0.747466	0.219371	0.120085	0.161286	0.0278228	0.0233971
283.061	C16H12O5	4724.65	265609	1	1.01036	1.09721	1.02017	0.0176229	0.0282669	21.6247	21.8017	22.0027	33.0007	34.1271	33.2867	23.8844	25.2944	19.6866	18.8013	18.9914	0.261263	0.26344
283.065	C13H16O5S	13577.6	233759	1	6.46746	6.68494	6.61277	0.0924363	0.100308	0.223962	0.267395	0.222542	0.977018	1.32077	1.34276	0.966782	0.858032	0.250443	0.110551	0.168324	0.0750688	0.0880506
283.077	C20H12O2	111.376	237165	1	0.011989	0.0124945	0	0	0	0.509982	0.483138	0.495682	1.69971	1.62555	1.4998	0.642857	0.68661	0.224312	0.167958	0.15206	0	0
283.082	C13H16O7	37161.6	266671	1	10.1943	10.7928	10.3439	24.1733	24.727	60.017	59.5467	59.924	40.5602	42.1004	41.5114	46.1733	46.7215	64.2661	61.5609	61.3385	4.32911	4.29644
283.094	C12H16N2O6	990.673	258695	1	0.13689	0.153909	0.155612	0.620369	0.659903	0.341608	0.238638	0.285601	2.68498	2.41535	1.98954	1.04663	0.974103	0.17414	0.15487	0.112934	0.220394	0.273367
283.098	C17H16O4	2620.51	268121	1	3.34095	3.6553	3.29845	0.441086	0.496234	11.7563	11.748	11.9779	20.0394	20.0858	19.5806	15.1	15.3105	8.58551	7.62199	7.23251	1.63414	1.69768
283.101	C14H20O4S	926.65	224026	1	0.278704	0.301498	0.302577	0	0	0	0	0	0.637456	0.790416	0.603322	0.233359	0.18845	0	0	0	0	0
283.109	C16H16N2O3	410.298	239654	1	0.107125	0.0953269	0.110826	0	0	0	0.0624311	0.0727405	2.38952	2.47481	2.48033	0.677084	0.595876	0	0	0	0.137738	0.148651
283.119	C14H20O6	56418.2	265251	1	13.471	14.8856	13.5764	35.8478	37.581	30.071	30.5014	31.1488	46.4361	46.1981	45.9909	45.3992	49.0729	51.3228	51.2577	47.4066	6.3677	6.16292
283.13	C13H20N2O5	397.655	255819	1	0.0394486	0.0637903	0.0599164	0.258671	0.240668	0	0	0	0.186199	0	0.160944	0	0	0	0	0	0.106507	0.0887843
283.134	C18H20O3	3096.92	267489	1	3.90336	4.30503	3.92596	0.810141	0.841069	5.16424	5.40138	5.36026	8.83024	7.57381	8.36766	6.44759	7.4698	2.57803	2.62909	2.40377	2.02744	2.04796
283.155	C15H24O5	5948.89	266438	1	2.55183	2.86957	2.62484	3.84762	3.96264	1.89982	1.86272	1.62302	9.2647	10.3081	9.356	10.4785	11.2648	13.7634	13.7561	13.2411	0.815899	0.733416
283.17	C19H24O2	1443.89	264617	1	1.78715	2.01406	1.7974	0.219884	0.22911	0.811672	0.636784	0.627066	1.54928	1.75822	1.74558	1.51742	1.58434	0.454826	0.270802	0.361624	0.431477	0.394459
283.264	C18H36O2	5503.84	262021	1	0	0	0	0	0	0	0	0	0	0	0	26.0528	33.8432	0	0	0	0	0
284.02	C14H7NO6	297.125	254888	1	0	0	0	0	0	0.507455	0.678736	0.580317	3.98876	3.9198	4.35311	0.654001	0.615912	0.0761457	0	0.116255	0	0
284.023	C11H11NO6S	81.6675	200699	1	0	0	0	0	0	0	0	0	0.598582	0.354304	0.612793	0.179008	0.169458	0	0	0	0	0
284.041	C11H11NO8	153.926	243666	1	0	0	0	0	0	0.497323	0.56407	0.439421	0.81366	0.635691	0.68424	0.199568	0.273072	0.40932	0.397497	0.256317	0	0
284.057	C15H11NO5	1224.4	265958	1	0.0730103	0.09918	0.0714395	0	0	3.15494	3.21289	3.14412	17.2844	17.4882	17.9383	6.24921	6.46669	0.612957	0.590394	0.507052	0.0604183	0.0663178
284.06	C12H15NO5S	43.522	187730	1	0.0167658	0.030246	0.0164622	0.00955796	0.0119611	0	0	0	0.273893	0.216366	0.211926	0	0	0	0	0	0.0274262	0.044019
284.068	C14H11N3O4	1637.16	180078	1	0.539156	0.584889	0.480894	0	0	0	0	0	1.4855	1.55336	1.95574	0	0	0	0	0	0	0
284.078	C12H15NO7	1732.02	267208	1	0.273326	0.330369	0.244572	1.05723	1.15372	1.86677	1.8498	2.18419	3.90374	4.45367	4.23357	3.37841	3.77663	1.08861	0.95912	1.06533	0.296679	0.344104
284.093	C16H15NO4	1059.85	264823	1	0.595392	0.648723	0.583149	0.071651	0.0814951	0.972607	1.11468	1.08012	8.74796	9.5804	8.79475	3.23458	3.22403	0.0759276	0.0950268	0.132842	0.314175	0.318041
284.104	C15H15N3O3	109.611	125753	1	0	0	0	0	0	0	0	0	0.36804	0.642763	0.333982	0	0	0	0	0	0	0
284.114	C13H19NO6	3745.08	262059	1	0.461207	0.524024	0.514936	2.30935	2.49465	0.105924	0.099283	0.0806446	1.11747	1.25054	1.02792	1.0862	1.28097	0	0	0	0.63805	0.629552
284.129	C17H19NO3	751.545	260155	1	0.37086	0.454676	0.417461	0.0903966	0.094934	0.0703722	0.0665673	0	1.09749	1.16458	1.17647	0.176215	0.298526	0	0	0	0.139322	0.183357
284.15	C14H23NO5	163.898	249781	1	0	0.0149316	0.0110107	0.101577	0.109175	0	0	0	0	0	0	0	0	0	0	0	0	0
284.166	C18H23NO2	57.1844	261621	1	0.0387845	0.021163	0.0299494	0	0	0	0	0	0	0	0	0	0	0	0	0	0	0
285.004	C14H6O7	908.52	265543	1	0	0	0	0	0	3.94911	3.98692	4.23097	4.93004	4.73772	5.02951	2.61543	2.86911	5.01369	5.28771	4.95982	0	0
285.008	C11H10O7S	863.73	250475	1	0	0	0	0	0	0.128285	0.294332	0.175661	0.625913	1.10849	0.963364	0.189867	0.183929	0.144416	0.206552	0.117514	0	0
285.023	C15H10O4S	178.622	233022	1	0	0	0	0	0	0.521177	0.838572	0.642517	0.822217	0.824011	0.704684	0.504343	0.492118	0.405237	0.424921	0.318368	0	0
285.025	C11H10O9	1749.01	259333	1	0	0	0	0	0	7.68149	7.56135	8.14514	1.20591	1.36325	1.62586	0.803214	0.444919	10.1733	9.98993	9.7194	0	0
285.04	C15H10O6	5245.53	262528	1	0.259455	0.278175	0.273384	0	0	23.6215	24.1589	24.4284	35.8782	37.0853	35.7415	24.4741	26.4093	26.933	27.2232	25.044	0.0591548	0.0469885
285.044	C12H14O6S	1950.33	246410	1	0.204998	0.163644	0.175772	0.0509467	0.0500153	0.422419	0.404295	0.483119	2.92608	2.39545	2.63259	0.641586	0.519276	0.152352	0.241188	0.158801	0.0450459	0.0248026
285.056	C19H10O3	427.796	250164	1	0	0	0	0	0	2.00159	1.97767	1.99224	3.15083	3.97277	4.36358	2.52712	2.81329	0.726422	0.72022	0.726426	0	0
285.062	C12H14O8	9015.37	266785	1	1.58761	1.88178	1.62572	2.60141	2.68945	40.9786	41.3917	41.9846	18.8653	18.3133	18.3934	17.2491	17.5064	40.9625	40.1528	37.8788	0.510415	0.501766
285.067	C18H10N2O2	45.0081	165441	1	0	0	0	0	0	0.0559857	0	0.0643137	0.584155	0.580994	0.659403	0.0997593	0.0824724	0	0	0	0	0
285.073	C11H14N2O7	70.4322	233348	1	0	0	0	0	0	0.250799	0.159936	0.2636	0.839486	0.773496	0.800097	0.409445	0.522049	0.0965794	0.073001	0.0881358	0	0
285.077	C16H14O5	4667.63	260785	1	2.8483	3.11408	2.92532	0.353817	0.398992	21.3971	21.4661	21.7371	33.1021	34.2357	33.7945	27.4064	28.2827	18.3315	18.2984	17.7826	1.43051	1.32527
285.08	C13H18O5S	34250.3	245899	1	2.00022	2.19552	1.99119	0.320696	0.32636	0.186006	0.124791	0.178877	1.21665	1.28331	1.2192	6.32127	6.5592	0.103461	0.0808317	0.0969079	0.122476	0.1778
285.088	C15H14N2O4	1026.08	243921	1	0.314014	0.362854	0.352542	0	0	0.487532	0.405688	0.351417	10.563	10.546	10.5608	2.83077	3.13074	0.18863	0.148105	0.126469	0.280494	0.279626
285.092	C20H14O2	165.158	252832	1	0.0318384	0.0238096	0.0318461	0	0	0.770526	0.72359	0.769141	1.55935	1.27659	1.5469	0.706777	0.711088	0.132891	0.252556	0.142184	0	0
285.098	C13H18O7	34490.1	264785	1	7.68917	8.08708	7.63861	22.2266	22.9744	35.6951	36.4167	37.5636	32.3525	34.5121	33.6133	38.298	37.7964	43.137	42.8993	44.6106	3.69842	3.55725
285.109	C12H18N2O6	196.253	251095	1	0.0380683	0.0436924	0.0426031	0.090604	0.130727	0.0435908	0	0.0623824	0.341522	0.259728	0.19513	0.119398	0.240011	0	0	0	0.044843	0.0193946
285.113	C17H18O4	5090.11	265692	1	6.38303	7.05181	6.52235	1.65778	1.72734	11.5445	11.8228	11.8915	22.1144	20.551	21.9896	16.533	17.2726	9.08634	8.18458	8.22974	3.47293	3.38229
285.117	C14H22O4S	406.101	242075	1	0.0993249	0.116675	0.100263	0	0	0	0	0	0.179842	0.203212	0	0	0	0	0	0	0	0
285.124	C16H18N2O3	495.912	242817	1	0.149317	0.141673	0.154055	0	0	0	0	0	1.5522	1.4286	1.57425	0.305414	0.235023	0	0	0	0.238644	0.216362
285.134	C14H22O6	12371.6	267107	1	3.25422	3.57728	3.29028	7.75357	8.24089	5.54911	5.51306	5.25705	14.3634	14.6854	13.9074	14.5377	15.8575	16.445	16.4159	16.0045	1.93507	1.73002
285.15	C18H22O3	4248.85	266437	1	5.30826	5.81065	5.44438	1.41961	1.55452	5.30828	5.41676	5.13004	8.87783	9.47231	9.46755	8.1446	8.80296	3.75515	3.31756	3.33614	2.61959	2.57805
285.171	C15H26O5	420.202	260443	1	0.0390249	0.0522759	0.0399623	0.132491	0.113601	0	0	0	0.202713	0.12881	0	0.460438	0.592213	0.53382	0.406044	0.535152	0	0
285.186	C19H26O2	1120.15	261466	1	1.47974	1.56248	1.37015	0.153583	0.146078	0.333474	0.217054	0.330017	1.21902	1.47605	1.10577	1.2539	1.21399	0.239563	0.206152	0.249032	0.22227	0.235234
285.999	C13H5NO7	14.5088	213417	1	0	0	0	0	0	0	0	0	0.147881	0.218076	0.166131	0.0700683	0.0880962	0	0	0	0	0
286.036	C14H9NO6	912.798	263467	1	0	0	0	0	0	2.15517	2.35941	2.24696	11.9599	13.7199	13.248	3.39741	3.58605	0.719305	0.513845	0.528093	0	0
286.039	C11H13NO6S	62.3482	223084	1	0	0	0	0	0	0	0	0	0.583421	0.521273	0.524946	0	0	0	0	0	0	0
286.047	C13H9N3O5	84.1875	133242	1	0	0	0	0	0	0	0	0	0.956645	0	0.794179	0	0	0	0	0	0	0
286.051	C18H9NO3	128.025	191310	1	0	0	0	0	0	0.113483	0.19798	0.0994996	1.95379	1.63382	1.75982	0.354943	0.333688	0	0	0	0	0
286.057	C11H13NO8	96.6157	236619	1	0	0	0	0	0	0.401103	0.415864	0.445404	0.595302	0.425696	0.420876	0.146752	0.173726	0.265226	0.155779	0.268886	0	0
286.072	C15H13NO5	1284.47	266093	1	0.460638	0.524946	0.462207	0.0467817	0.0660755	2.99909	3.20927	3.52325	18.3339	18.4351	18.2955	7.94152	7.93457	0.71544	0.802517	0.633766	0.278234	0.32088
286.083	C14H13N3O4	4099.89	196373	1	0.0754339	0.0939788	0.117518	0.0156651	0.0196571	0	0	0	1.49232	1.6653	1.91637	0	0	0	0	0	0.0340617	0.0349997
286.087	C19H13NO2	58.0541	216658	1	0	0	0	0	0	0.0947842	0.0872429	0.0920571	0.544515	0.87259	0.446452	0.165121	0.140279	0	0	0	0	0
286.093	C12H17NO7	929.458	257396	1	0.0812153	0.05578	0.0675019	0.570318	0.619126	0.127551	0.169378	0.133341	0.773299	0.998192	0.961233	0.89259	0.809066	0.133974	0.115981	0.0964828	0.089225	0.0962165
286.109	C16H17NO4	1426.77	263122	1	1.07591	1.32191	1.05931	0.382185	0.400939	0.563456	0.428933	0.479587	6.63123	6.74024	6.7695	2.76654	2.97873	0.106386	0.118084	0	0.842967	0.808862
286.12	C15H17N3O3	48.6024	168880	1	0	0	0	0.0120551	0.0196556	0	0	0	0	0	0	0	0	0	0	0	0	0
286.13	C13H21NO6	341.641	244325	1	0	0.0200225	0.0199174	0.222234	0.214412	0	0	0	0	0	0	0	0	0	0	0	0.0172409	0.0224234
286.145	C17H21NO3	629.674	259891	1	0.346575	0.369676	0.383243	0.162044	0.149726	0	0	0	0.415759	0.254075	0.468563	0.106964	0.112871	0	0	0	0.153936	0.158492
286.987	C10H8O8S	61.3581	248650	1	0	0	0	0	0	0	0	0	0.251435	0.180739	0.261995	0	0	0	0	0	0	0
287.002	C14H8O5S	57.7563	229961	1	0	0	0	0	0	0.0851184	0.0769853	0.105245	0.498896	0.49019	0.418518	0.116541	0.0962796	0	0	0	0	0
287.017	C18H8O2S	28.4779	209848	1	0	0	0	0	0	0	0	0	0	0.194896	0.179452	0.134582	0.21108	0	0	0	0	0
287.02	C14H8O7	3291.17	262347	1	0.0228571	0.0191907	0.0172262	0	0	14.8191	14.5814	15.327	20.7484	20.1636	21.1908	13.1736	14.1623	20.5797	20.3732	20.3924	0	0
287.023	C11H12O7S	773.041	247268	1	0	0	0	0	0	0.358305	0.317366	0.316588	0.942685	0.707902	0.876909	0.250512	0.298983	0.214316	0.256047	0.119215	0.0170445	0.0138056
287.035	C18H8O4	303.954	249233	1	0	0	0	0	0	1.07238	1.38651	1.41551	3.12924	3.25804	3.28555	2.16241	1.95882	0.749212	0.857187	0.892241	0	0
287.038	C15H12O4S	465.053	245907	1	0	0	0	0	0	1.50257	1.2905	1.2266	1.38076	1.25286	1.24379	1.06241	1.39385	0.884856	0.933746	0.891435	0	0
287.041	C11H12O9	2721.12	264725	1	0	0	0	0	0	12.9461	12.4154	12.6723	3.24501	2.5417	2.36467	1.45574	1.26133	13.1402	13.238	12.3136	0	0
287.056	C15H12O6	6938.84	264304	1	1.53621	1.69971	1.52617	0.113896	0.109946	29.3669	30.4023	32.3142	42.0583	44.4413	43.7441	34.4991	35.4638	34.0724	34.552	34.2482	0.553377	0.443163
287.059	C12H16O6S	3874.58	243703	1	0.242884	0.255798	0.247145	0.305163	0.304788	0.440132	0.319632	0.435722	2.69836	2.58628	2.60921	0.717812	0.734716	0	0.170071	0.210775	0.128134	0.110345
287.067	C14H12N2O5	1106.13	249496	1	0.204387	0.178221	0.175799	0.0194287	0.0283943	0.602488	1.01338	1.10024	16.4379	15.4122	16.2057	4.07861	4.40585	0.243736	0.388943	0.295559	0.185192	0.194128
287.071	C19H12O3	938.48	255792	1	0.0355606	0.0367141	0.0387309	0	0	4.22039	4.39944	4.3705	6.25432	6.59701	7.23271	4.68469	4.60459	1.55085	1.22396	1.44904	0	0
287.075	C16H16O3S	85.4185	189332	1	0.0387265	0.0404558	0.0323377	0	0	0.423918	0.325206	0.302597	0.452224	0.608764	0.531107	0.275367	0.249331	0.126727	0.140519	0.102054	0	0
287.077	C12H16O8	5335.37	265781	1	1.2714	1.37846	1.23846	3.00606	3.31904	21.6362	22.2204	22.8886	12.296	13.0234	12.827	13.4481	13.7307	24.2628	24.169	23.2584	0.415186	0.414344
287.09	C9H21O8P	79.3361	139624	1	0	0	0	0.0507478	0.0528469	0	0	0	0	0	0	0	0	0	0	0	0	0
287.093	C16H16O5	5542.93	262393	1	6.98884	7.44901	7.10258	2.15836	2.22723	20.764	21.9624	21.254	33.5438	36.832	35.1708	30.9101	31.311	18.9411	18.4726	19.1394	3.75062	3.67656
287.096	C13H20O5S	592.413	240974	1	0.17812	0.16819	0.151132	0.174073	0.152966	0.07822	0.0643257	0.065059	0.471983	0.541267	0.630836	0.195566	0.200977	0	0	0	0.119215	0.105445
287.104	C15H16N2O4	1329.18	254099	1	0.712942	0.845415	0.70842	0.280913	0.251511	0.345448	0.323601	0.378845	8.66195	9.92751	10.0796	3.21938	3.33844	0.0809303	0.150474	0	0.984385	1.05456
287.108	C20H16O2	166.47	256602	1	0.0561032	0.0439642	0.0546124	0	0	0.609037	0.781519	0.545189	0.781338	0.942813	0.659183	0.416822	0.49956	0.0870253	0.228795	0.149761	0	0
287.114	C13H20O7	7223.06	267272	1	1.80389	1.99409	1.8094	4.52054	4.81139	5.38985	6.03079	5.82351	9.62066	9.96195	10.0965	10.9061	12.0491	12.7145	12.7409	11.9317	1.09842	0.946341
287.129	C17H20O4	8794.58	262492	1	11.1717	11.6674	11.2692	3.78726	3.83876	12.4347	12.7186	12.547	23.0001	24.8384	23.0034	19.1475	19.5747	11.3014	10.6943	10.8808	5.34611	5.19565
287.14	C16H20N2O3	334.596	257343	1	0.149152	0.113954	0.144029	0.0851524	0.10112	0	0	0	0.20605	0.414022	0.390274	0	0	0	0	0	0.133938	0.140922
287.15	C14H24O6	827.303	256359	1	0.046835	0.0565039	0.0857144	0.490961	0.551079	0	0	0	0.327053	0.463716	0.21193	0.680568	0.533163	0.749405	0.670565	0.768279	0.0321006	0.0259037
287.165	C18H24O3	4144.85	264590	1	5.23247	5.53353	5.31112	1.48706	1.53633	3.5101	3.77655	3.64495	7.75883	8.24834	8.70747	7.51723	7.81221	3.37211	3.00371	2.80369	2.00895	1.983
287.202	C19H28O2	344.662	257854	1	0.429683	0.439758	0.441641	0.0232301	0.0255796	0.0413108	0.0495619	0.0616375	0.286531	0.171171	0.288136	0.185111	0.192611	0.113707	0.0664732	0	0.0358052	0.044717
288.015	C13H7NO7	179.909	253153	1	0	0	0	0	0	0.296691	0.275485	0.431027	2.53489	2.70414	2.39066	0.586965	0.580653	0.167448	0.138321	0.164382	0	0
288.03	C17H7NO4	48.0731	156922	1	0	0	0	0	0	0	0.0696865	0.12056	0.644073	0.722569	0.566404	0	0	0	0	0	0	0
288.034	C14H11NO4S	51.4583	200400	1	0	0	0	0	0	0	0	0	0.664161	0.77345	0.730862	0.246619	0.142518	0	0	0	0	0
288.051	C14H11NO6	1246.75	264895	1	0.0813335	0.120134	0.118701	0.0160793	0.0203423	3.74955	4.15931	4.21108	19.0266	18.3564	17.9722	6.64677	6.07851	1.65881	1.7442	1.42146	0.107412	0.0813236
288.063	C13H11N3O5	284.674	163165	1	0	0	0	0.0064383	0.0126865	0	0	0	2.45108	2.55583	2.61687	0	0	0	0	0	0.0200192	0.0166269
288.067	C18H11NO3	243.943	230272	1	0	0	0	0	0	0.343838	0.403173	0.291203	2.90949	3.66661	3.46931	0.653207	0.684922	0	0	0	0	0
288.072	C11H15NO8	31.0456	176068	1	0	0	0	0	0	0.0573781	0	0.0889599	0.28145	0.186405	0.160256	0.0741232	0.0951835	0	0	0	0	0
288.088	C15H15NO5	1563.37	265954	1	1.4078	1.58695	1.41126	0.654446	0.756153	2.47079	2.92199	2.79006	16.6673	16.3271	17.8594	7.89841	8.56491	0.838826	0.827872	0.715605	1.46375	1.3486
288.099	C14H15N3O4	215.363	182714	1	0	0	0	0.0562383	0.0429878	0	0	0	1.51658	1.55287	1.95572	0	0	0	0	0	0.0659226	0.075247
288.109	C12H19NO7	34.3597	214667	1	0	0	0	0.0175475	0.0214403	0	0	0	0	0	0	0	0	0	0	0	0	0
288.124	C16H19NO4	1804.2	262332	1	1.52831	1.64111	1.50619	0.902487	0.984605	0.1505	0.16898	0.161545	3.99936	3.45321	3.89338	1.89028	1.74173	0	0	0	1.20206	1.22735
288.135	C15H19N3O3	35.5098	227269	1	0	0	0	0.0197718	0.0236536	0	0	0	0	0	0	0	0	0	0	0	0.0409092	0.0121144
288.161	C17H23NO3	339.717	260184	1	0.19557	0.184569	0.133964	0.0782983	0.079556	0	0	0	0.135414	0.128053	0.194246	0	0	0	0	0	0.0404655	0.0407171
288.999	C13H6O8	950.938	260507	1	0	0	0	0	0	3.35747	3.56282	3.93852	2.2644	2.65422	2.57019	2.17841	2.11928	7.00352	7.52114	6.84756	0	0
289.002	C10H10O8S	121.032	247875	1	0	0	0	0	0	0.104542	0.0853754	0.0756747	0.25584	0.305885	0.158984	0.0856293	0.0738714	0.113718	0.0753514	0.0838523	0	0
289.014	C17H6O5	60.7969	240763	1	0	0	0	0	0	0.230422	0.23282	0.140891	0.60922	0.550143	0.633302	0.461109	0.434033	0.245719	0.289138	0.224344	0	0
289.018	C14H10O5S	178.341	241062	1	0	0	0	0	0	0.410651	0.456405	0.512895	0.934157	1.36456	0.986991	0.451812	0.414875	0.364577	0.311616	0.241699	0	0
289.033	C18H10O2S	30.1808	200088	1	0	0	0	0	0	0.0758644	0.0815856	0.0754622	0.18011	0.217496	0.181419	0.150739	0.223702	0.0809753	0.0708802	0	0	0
289.035	C14H10O7	5801.56	262433	1	0.160753	0.229783	0.194098	0	0	26.7856	26.5226	27.0178	32.9375	34.5436	34.3383	23.8997	24.4951	41.0769	39.7663	39.211	0.0338803	0.0264528
289.039	C11H14O7S	648.54	243639	1	0.0144824	0.0216481	0.021686	0.0349173	0.0299463	0.453301	0.609572	0.547619	1.94449	1.5076	1.83839	0.574668	0.562657	0.180256	0.171508	0.105348	0.0348826	0.0148793
289.047	C13H10N2O6	685.088	244906	1	0.0362695	0.0340114	0.0274616	0	0	0.88509	0.870435	0.701332	8.98824	9.62918	10.0371	1.52823	2.06074	0.404069	0.305121	0.281556	0.0247312	0.0347164
289.051	C18H10O4	1543.94	261355	1	0.0195719	0	0.0288486	0	0	6.83264	6.79688	7.19013	11.4041	11.0309	11.9475	7.70794	7.72265	4.16918	4.19668	4.06098	0	0
289.054	C15H14O4S	228.242	223872	1	0.0562642	0.0493567	0.0520115	0	0	1.04136	1.07152	0.951788	1.03972	1.24963	1.37373	0.900279	1.1879	0.783494	0.816243	0.618837	0	0
289.057	C11H14O9	1074.34	251143	1	0	0	0	0	0	3.92563	4.09984	4.08267	1.06746	1.24507	1.39899	0.539609	0.728957	7.72512	8.49718	7.97996	0	0
289.069	C19H14OS	206.532	177958	1	0	0	0	0.134347	0.124412	0	0	0	0.12562	0.202427	0	0	0	0	0	0	0	0
289.072	C15H14O6	7492.43	261197	1	4.60464	4.95422	4.73253	1.53386	1.6567	32.0263	32.9348	34.8922	45.7847	48.6064	47.8744	41.7033	43.6125	39.1228	37.7992	37.9185	2.40629	2.34034
289.075	C12H18O6S	1012.23	252948	1	0.184298	0.195561	0.175873	0.477947	0.453382	0.416664	0.319137	0.418948	3.85958	3.91293	3.63041	1.02102	0.726127	0.121639	0.128423	0.0929101	0.141282	0.120438
289.083	C14H14N2O5	1501.54	259146	1	0.786769	0.846309	0.846153	0.292954	0.298801	1.22688	1.12891	1.23046	17.3377	17.2659	17.7154	6.09554	5.70063	0.44641	0.409586	0.459099	0.857845	1.00644
289.087	C19H14O3	1087.49	263303	1	0.141829	0.18512	0.154277	0	0	5.12807	5.00768	5.06443	7.38156	6.91899	5.8207	4.77622	5.15263	1.86929	1.52107	1.59743	0	0
289.093	C12H18O8	1657.53	257211	1	0.0881965	0.087989	0.0908271	0.579452	0.582044	2.82511	2.98172	2.88337	1.50072	1.56103	1.74377	2.81159	2.84138	5.70708	5.54312	5.49874	0.0947534	0.0631175
289.108	C16H18O5	11896.2	261323	1	14.9287	15.9289	15.2435	7.65483	7.89971	22.7757	22.2327	23.0908	39.7095	39.9754	39.645	33.7437	36.9905	24.2546	23.0233	21.691	7.88745	7.65129
289.112	C13H22O5S	404.722	248941	1	0.0410375	0.0238054	0.0398582	0.0292102	0.0214171	0	0	0	0.385619	0.534987	0.579348	0.133339	0.187865	0	0	0	0	0
289.119	C15H18N2O4	1479.14	257123	1	0.915663	1.07087	0.952893	0.772375	0.788842	0.191012	0.166282	0.134772	4.30904	3.84712	4.93384	1.6381	1.72234	0	0	0	1.9802	1.9364
289.123	C20H18O2	125.342	259088	1	0.152552	0.119338	0.118816	0	0	0.442056	0.422269	0.365987	0.475372	0.792176	0.455504	0.116992	0.310976	0.0686005	0.071179	0.0881057	0	0
289.129	C13H22O7	465.404	238008	1	0.0174717	0.0189838	0.0249529	0.150729	0.20391	0	0	0	0.192505	0.123766	0	0.307647	0.256624	0.424471	0.388325	0.400831	0.0156549	0.0194039
289.145	C17H22O4	10011.2	262013	1	12.6635	13.3584	12.8281	5.71517	5.75826	10.8758	11.6427	11.3009	25.4234	26.5347	25.4135	19.6914	20.3222	11.9428	11.5894	11.068	5.72065	5.51972
289.156	C16H22N2O3	86.846	252281	1	0.0380097	0.0285399	0.0543289	0.0335564	0.0340113	0	0	0	0	0	0	0	0	0	0	0	0.0262364	0.0333466
289.181	C18H26O3	2280.58	263012	1	2.88107	3.18114	2.84103	0.882073	0.901116	1.0999	1.15986	1.29352	3.85834	4.05769	3.22102	3.21391	3.64965	1.56282	1.21133	1.03178	0.856843	0.834626
290.013	C13H9NO5S	42.816	232246	1	0	0	0	0	0	0	0	0	0.615095	0.599793	0.627286	0.248429	0.173655	0	0	0	0	0
290.031	C13H9NO7	577.897	259297	1	0	0	0	0	0	1.93111	1.91771	2.06474	7.8208	7.52551	7.68484	2.23279	2.12594	0.738765	0.683616	0.710613	0	0
290.042	C12H9N3O6	66.121	114458	1	0	0	0	0	0	0	0	0	0.805898	0.872024	0.968723	0	0	0	0	0	0	0
290.046	C17H9NO4	320.586	221664	1	0	0	0	0	0	0.587109	0.456184	0.422905	4.89246	4.38253	4.40745	0.872698	0.785912	0	0	0	0	0
290.067	C14H13NO6	1380.47	265691	1	0.701235	0.727911	0.689898	0.301061	0.344024	4.8018	4.91874	4.9671	20.4357	20.5718	20.0013	10.2371	10.2321	2.19711	2.09669	1.90375	0.70031	0.708149
290.078	C13H13N3O5	218.73	186161	1	0	0	0	0.0266652	0.0374701	0	0	0	2.41616	3.28765	2.84745	0	0	0	0	0	0.0331971	0.025837
290.082	C18H13NO3	238.124	247175	1	0.0191865	0	0.0220185	0	0	0.442728	0.463263	0.45242	3.1089	3.57915	3.32806	0.731623	0.788432	0	0	0	0	0
290.103	C15H17NO5	3156.46	263421	1	2.23124	2.55112	2.30354	1.9393	2.10257	1.49934	1.70963	1.62626	14.1798	13.0911	14.0337	7.12382	8.27778	0.597045	0.473056	0.584839	2.89986	2.74539
290.115	C14H17N3O4	182.678	203290	1	0	0	0	0.101065	0.0732318	0	0	0	0.531465	0.768944	0.877416	0	0	0	0	0	0.109292	0.0861429
290.14	C16H21NO4	1573.32	260648	1	1.10414	1.30164	1.16064	1.007	1.04801	0.0656209	0	0.0418642	1.65579	1.49581	1.74615	0.532133	0.68774	0	0	0	0.747501	0.763345
290.176	C17H25NO3	56.2162	261426	1	0.0261654	0.0309418	0.0153473	0.0167925	0.0232735	0	0	0	0	0	0	0	0	0	0	0	0	0
290.997	C13H8O6S	97.0135	246831	1	0	0	0	0	0	0.116188	0.0750721	0.0850436	0.412479	0.549065	0.453427	0.102383	0.117402	0	0	0	0	0
291.012	C17H8O3S	21.625	213308	1	0	0	0	0	0	0.078081	0.0474115	0.0504813	0.22544	0.206254	0.215621	0	0	0.0842057	0	0.0820364	0	0
291.015	C13H8O8	2566.09	262477	1	0	0	0	0	0	10.7709	11.2048	11.5344	11.2684	12.5423	11.1901	7.65286	7.6851	20.1656	19.5838	20.0153	0	0
291.018	C10H12O8S	245.108	220933	1	0	0	0	0	0	0.19344	0.138002	0.158583	0.568034	0.483232	0.633874	0.137628	0.0639043	0.0910605	0.0751432	0.117153	0	0
291.026	C12H8N2O7	115.729	221794	1	0	0	0	0	0	0.196512	0.160602	0.176249	1.67519	1.73948	1.22014	0.170627	0.279543	0	0	0	0	0
291.03	C17H8O5	1107.82	262628	1	0	0	0	0	0	5.31666	5.20086	5.13286	9.31124	8.75904	8.7616	6.14411	6.16428	4.64496	4.43473	4.11024	0	0
291.033	C14H12O5S	368.627	240439	1	0.0237383	0.0352602	0.0206247	0	0	0.845769	0.845206	0.910233	1.23206	1.95928	1.44752	0.97386	0.875821	1.08873	1.04585	1.06072	0	0
291.049	C18H12O2S	32.1918	224586	1	0	0	0	0.0133275	0.0214434	0	0.105543	0.0690837	0.226013	0.207634	0.212816	0.165602	0.15358	0	0	0	0	0
291.051	C14H12O7	8041.85	261931	1	1.70886	1.82811	1.66239	0.510355	0.563435	35.6404	37.4809	37.4509	39.9676	40.5589	40.9313	36.2372	35.7538	56.9238	55.2392	57.539	0.567192	0.515374
291.054	C11H16O7S	897.501	244976	1	0.0578769	0.0744917	0.0566849	0.225368	0.219757	0.721622	0.730912	0.757286	9.35228	9.70089	9.95772	1.50084	1.34203	0.397699	0.343444	0.434613	0.106544	0.0653798
291.062	C13H12N2O6	1008.31	257457	1	0.150828	0.148086	0.162607	0.0517179	0.0361762	1.47997	1.57679	1.43226	13.5872	13.885	14.7725	4.01403	3.81882	0.58953	0.552208	0.693435	0.145724	0.17773
291.066	C18H12O4	2327.62	264825	1	0.197347	0.221146	0.154144	0	0	10.8271	10.9274	10.7678	18.139	17.7996	16.7182	11.0981	12.1015	6.78175	6.69959	6.30076	0.0163599	0.0211902
291.07	C15H16O4S	299.479	211594	1	0.162334	0.202776	0.169768	0.0118172	0.0159484	0.489203	0.451265	0.402462	1.1794	1.13693	0.991821	0.52268	0.742314	0.144143	0.228513	0.242326	0	0
291.078	C17H12N2O3	200.567	210509	1	0	0	0	0	0	0.203464	0.228326	0.124015	2.97614	3.01464	2.73361	0.341153	0.57536	0	0	0	0	0
291.085	C19H16OS	139.27	209612	1	0	0	0	0.0862487	0.0927699	0	0	0	0	0	0	0	0	0	0	0	0	0
291.087	C15H16O6	14194	261772	1	12.4226	13.1204	12.6271	9.13754	9.45482	35.4545	37.1504	37.666	50.663	53.2321	51.7587	51.8345	51.9171	46.0231	44.7733	46.8518	6.44655	6.55207
291.091	C12H20O6S	691.407	232663	1	0.0595833	0.0684373	0.0624378	0.0648532	0.0502376	0.0969823	0	0.0727328	2.18854	2.18597	2.21497	0.466506	0.431779	0.160772	0.0876233	0.123102	0.0340294	0.0239775
291.099	C14H16N2O5	1990.27	259780	1	1.38814	1.50978	1.33808	1.26128	1.32575	0.872944	1.01378	0.880373	14.106	14.2024	14.7866	5.67369	6.16295	0.316353	0.444051	0.367807	2.41404	2.25504
291.103	C19H16O3	846.337	262773	1	0.568523	0.506063	0.510213	0	0	4.15496	3.78178	3.94139	5.08068	5.0571	5.21915	3.44287	3.90148	1.1496	1.11266	0.866053	0.0455595	0.0458114
291.124	C16H20O5	29810.8	261177	1	22.5323	23.9127	22.5727	18.9614	19.8574	24.3229	25.1632	24.4356	46.9145	50.1841	46.4695	40.7533	41.8826	27.7923	27.4508	27.2183	10.5301	10.5809
291.135	C15H20N2O4	1322.15	257889	1	0.570996	0.648154	0.539204	0.831973	0.880707	0.0602294	0	0.0390807	0.505045	0.857509	0.678472	0.216345	0.248576	0	0	0	1.64255	1.49606
291.139	C20H20O2	326.058	261781	1	0.349038	0.421132	0.417803	0	0	0.38376	0.295266	0.31139	0.531063	0.382734	0.520303	0.238452	0.248242	0	0	0	0.0228455	0.028161
291.16	C17H24O4	7259.05	261850	1	9.10136	9.60955	9.30158	4.67398	4.60494	7.08579	6.94062	7.28076	19.0682	20.3063	18.4495	14.2458	14.0912	8.01581	7.51842	7.87716	3.81246	3.70651
291.197	C18H28O3	595.606	259810	1	0.777191	0.830802	0.685998	0.136003	0.181194	0.0951377	0.112922	0.146097	0.689304	0.528246	0.701205	0.437406	0.44112	0.161912	0.152663	0.114288	0.0915835	0.0693154
292.01	C12H7NO8	66.6948	227426	1	0	0	0	0	0	0.117668	0.107455	0.110314	0.596274	0.673856	0.977129	0.188556	0.0985799	0.0771513	0	0.1053	0	0
292.025	C16H7NO5	101.166	237229	1	0	0	0	0	0	0.0764635	0.19783	0.13623	1.53584	1.20766	1.48215	0.27451	0.250484	0	0	0	0	0
292.029	C13H11NO5S	210.681	213152	1	0	0	0	0	0	0	0	0	0.8398	1.07734	0.588292	0.425918	0.260728	0	0	0	0	0
292.046	C13H11NO7	924.405	263834	1	0.0546588	0.0327504	0.0686175	0.0112917	0.0137396	3.33698	3.99792	3.72641	10.7202	11.6883	12.1856	5.1695	4.63417	1.87264	1.83757	1.9873	0.035614	0.0411425
292.058	C12H11N3O6	121.786	150490	1	0	0	0	0	0	0	0	0	1.80245	1.26158	1.78426	0	0	0	0	0	0	0
292.062	C17H11NO4	630.997	245936	1	0	0.0272553	0.0145147	0	0	1.36788	1.14376	1.33974	9.62963	9.3194	8.8243	2.55585	2.52321	0.0819676	0.115734	0	0	0
292.083	C14H15NO6	2923.41	263094	1	1.78922	2.02649	1.83785	1.80894	1.94733	4.27642	4.26139	4.85656	19.2328	20.4978	20.1943	11.3812	11.8598	2.32796	2.53818	2.48803	2.58179	2.61717
292.094	C13H15N3O5	241.417	235366	1	0	0	0	0.125661	0.160812	0	0	0	1.51362	2.1905	1.80958	0	0	0	0	0	0.0736956	0.0816795
292.098	C18H15NO3	194.474	244756	1	0.050213	0.0389273	0.06797	0	0	0.344978	0.180773	0.290168	2.55417	2.65475	2.4578	0.327687	0.497777	0	0	0	0	0
292.119	C15H19NO5	5414.12	260783	1	2.5178	2.74441	2.40783	3.20089	3.60643	0.694131	0.708493	0.639218	8.11189	8.47351	8.30799	5.24697	5.42236	0.252273	0.296807	0.373708	3.34761	3.30314
292.13	C14H19N3O4	123.71	199627	1	0	0	0	0.0646794	0.0824049	0	0	0	0	0	0	0	0	0	0	0	0.0988833	0.0765479
292.134	C19H19NO2	50.9458	245936	1	0.0190791	0.0225487	0.0118958	0	0	0	0	0	0	0	0	0	0	0	0	0	0	0
292.156	C16H23NO4	781.49	260092	1	0.413092	0.387656	0.33794	0.508352	0.514961	0	0	0	0.491383	0.233842	0.314673	0.182209	0.0858589	0	0	0	0.173882	0.13715
292.994	C12H6O9	362.332	246216	1	0	0	0	0	0	1.09748	1.27742	1.2052	0.297511	0.683568	0.871074	0.386036	0.288618	2.47721	2.31538	2.52229	0	0
293.007	C9H11O9P	25.4802	201527	1	0	0	0	0	0	0	0	0	0	0	0	0.152063	0.188861	0	0	0	0	0
293.009	C16H6O6	320.592	254941	1	0	0	0	0	0	1.39092	1.4636	1.49299	2.35219	2.15964	2.05812	1.70756	1.92431	1.46591	1.54069	1.31988	0	0
293.013	C13H10O6S	291.281	241600	1	0	0	0	0	0	0.165832	0.298764	0.279924	1.1391	1.35858	1.20867	0.385141	0.212483	0.139313	0.106187	0.132195	0	0
293.028	C17H10O3S	44.4232	217196	1	0	0	0	0	0	0.164182	0.149702	0.180132	0.677941	0.550355	0.507317	0.240019	0.240306	0.108144	0.102089	0	0	0
293.03	C13H10O8	5173.62	252570	1	0.0576165	0.0364913	0.0567048	0	0	22.4588	21.8453	22.3107	18.9103	18.6395	18.6872	15.9206	16.6398	42.3996	40.919	39.9934	0	0
293.041	C12H10N2O7	330.632	246624	1	0	0	0	0	0	0.596541	0.676954	0.555362	4.28249	4.96961	4.07216	0.934441	0.818821	0.331817	0.316332	0.24824	0	0
293.046	C17H10O5	3104.37	260790	1	0.0973566	0.0589371	0.0529974	0	0	14.1843	14.1328	14.457	22.9828	23.7101	22.9759	15.3406	16.3938	11.974	11.7359	11.1212	0	0
293.049	C14H14O5S	839.707	237164	1	0.409576	0.448916	0.402175	0	0	0.809325	0.656408	0.845742	1.76665	1.55146	2.04844	1.16597	0.739613	0.644024	0.542769	0.847211	0	0
293.064	C18H14O2S	50.1657	195408	1	0	0	0	0.0317342	0.0334161	0.0526628	0.0923481	0.0852377	0.311081	0.157492	0.448791	0.0776576	0.123815	0.0735817	0	0.0661523	0	0
293.067	C14H14O7	10034.7	261378	1	5.21421	5.81373	5.4889	4.25979	4.62403	43.8046	44.8582	46.7316	45.2392	48.5235	46.4241	46.5565	49.0552	65.4495	66.3767	63.5812	2.84062	2.72758
293.07	C11H18O7S	769.861	244076	1	0.032169	0.0640135	0.0430835	0.0250701	0.0330672	0.259885	0.372842	0.228792	5.6592	6.13369	5.22244	0.755697	0.928037	0.459551	0.323857	0.233941	0.0152501	0.0510139
293.078	C13H14N2O6	1020.26	261325	1	0.609513	0.688648	0.534732	0.62965	0.674584	1.5685	1.46935	1.60806	12.9638	14.8318	14.5182	6.24561	5.36062	0.685303	0.692047	0.795394	0.89806	0.847822
293.082	C18H14O4	2448.99	260862	1	0.6484	0.842252	0.805983	0	0	10.389	10.3001	11.405	16.9083	15.9915	17.2616	11.9076	12.4457	6.208	6.23335	5.46335	0.119711	0.106655
293.093	C17H14N2O3	228.906	223705	1	0.0386851	0.0412634	0.0193466	0	0	0	0	0	2.72576	2.85437	2.49762	0.350864	0.435037	0	0	0	0	0
293.103	C15H18O6	60118.3	262265	1	25.6704	27.5857	26.1956	37.1545	40.0457	49.232	50.8453	50.0252	66.9756	68.3856	67.2849	67.7825	68.3983	67.3981	64.033	66.0454	13.2423	13.115
293.106	C12H22O6S	191.624	230003	1	0	0	0	0	0	0	0	0	0.904299	0.829569	1.01316	0	0	0	0	0	0	0
293.114	C14H18N2O5	3254.48	259455	1	1.28477	1.47452	1.47791	1.99134	2.16785	0.256428	0.266673	0.267798	5.20025	5.11559	5.77698	2.55715	2.23323	0.08099	0.168226	0.193812	3.26092	3.1979
293.118	C19H18O3	1015.41	264431	1	1.2799	1.39804	1.21177	0.0193831	0.0142944	3.63658	3.20786	3.35959	4.58284	5.09228	5.37594	3.71298	3.61977	0.908287	0.574458	0.563631	0.253626	0.222159
293.139	C16H22O5	34622.2	260316	1	20.395	22.7726	20.8116	21.8726	23.0624	19.0608	19.4006	19.7456	45.1016	44.6823	44.0982	36.076	39.5988	27.1124	26.4261	25.5675	9.16697	8.65252
293.151	C15H22N2O4	367.486	252959	1	0.11194	0.143397	0.0768235	0.239046	0.219092	0	0	0	0	0	0	0	0	0	0	0	0.148378	0.164926
293.155	C20H22O2	610.455	258574	1	0.650993	0.851514	0.621913	0.0211474	0.0345675	0.407169	0.367291	0.306711	0.696578	0.685436	0.631846	0.487519	0.551285	0	0	0	0.0784339	0.0870574
293.176	C17H26O4	3607.7	262066	1	3.52229	3.55392	3.38025	2.30099	2.40314	1.35807	1.48532	1.29481	7.21859	6.5947	6.75078	5.58207	5.91929	4.07465	3.62405	3.64618	1.23099	1.15414
293.179	C14H30O4S	2230.9	260231	1	0.0679242	0.0704598	0.0709241	0.00725714	0.0125755	0	0	0	0.128207	0.145516	0.129067	1.48633	1.34564	4.33623	4.50652	4.43701	3.20523	3.07209
293.212	C18H30O3	168.927	256669	1	0.0145022	0.0342427	0.0116024	0	0	0	0	0	0	0	0	0.124551	0.0985856	0	0	0	0	0
294.008	C12H9NO6S	44.3406	228448	1	0	0	0	0	0	0	0	0	0.305989	0.427055	0.649623	0.157827	0.0842235	0	0	0	0	0
294.023	C16H9NO3S	37.4353	169827	1	0	0	0	0	0	0	0	0	0.267972	0.562676	0.266038	0	0	0	0	0	0	0
294.026	C12H9NO8	245.774	248000	1	0	0	0	0	0	0.568439	0.423109	0.478152	1.51605	1.81934	1.51499	0.35329	0.25132	0.13657	0.349085	0.151665	0	0
294.041	C16H9NO5	707.655	252623	1	0	0	0	0	0	1.43814	1.22178	1.46731	10.2096	10.6365	9.73954	2.50787	2.69033	0.175462	0.136586	0.22205	0	0
294.044	C13H13NO5S	64.9381	208805	1	0.0192702	0.0134684	0.0191707	0	0	0	0	0	0.738804	0.844942	0.693126	0	0	0	0	0	0	0
294.062	C13H13NO7	1152.53	263970	1	0.37404	0.438065	0.381532	0.404188	0.397779	4.70457	5.41072	5.16438	14.5997	13.3021	13.8025	7.61514	7.79324	3.10465	2.83758	2.8948	0.523074	0.526255
294.073	C12H13N3O6	126.851	171100	1	0	0	0	0.00972107	0.0146482	0	0	0	1.86948	1.45725	1.85846	0	0	0	0	0	0	0
294.077	C17H13NO4	643.084	255772	1	0.0970708	0.106197	0.0989303	0	0	1.26428	1.35195	1.30954	9.10044	9.49286	9.42166	2.79946	2.91056	0	0.0796674	0.100056	0.03294	0.0120549
294.098	C14H17NO6	7827.37	261971	1	2.77461	2.97542	2.78934	4.93754	5.21393	2.91233	3.03067	3.00638	14.8501	14.8346	13.9215	9.98688	10.5259	1.82006	2.33059	1.6785	4.44586	4.46762
294.11	C13H17N3O5	377.27	207449	1	0.06551	0.0518613	0	0.245411	0.227297	0	0	0	0.732095	0.838985	0.94009	0	0	0	0	0	0.0848995	0.137493
294.114	C18H17NO3	244.303	251823	1	0.108527	0.145961	0.121831	0	0	0.133016	0.202099	0.159721	1.08353	1.61586	1.60151	0.281066	0.352824	0	0	0	0.0298977	0.0290743
294.135	C15H21NO5	4537.28	257322	1	1.50105	1.65493	1.55447	2.77132	3.02235	0.047757	0.0511443	0.0534425	2.02002	2.33319	2.61401	1.65269	1.56332	0	0	0	1.78965	1.78306
294.146	C14H21N3O4	81.4185	243421	1	0.0257705	0.0122201	0.0154175	0.052962	0.0285499	0	0	0	0	0	0	0	0	0	0	0	0	0
294.171	C16H25NO4	100.568	250903	1	0.0274129	0.0352033	0.0309593	0.0654187	0.0561853	0	0	0	0	0	0	0	0	0	0	0	0	0
294.992	C12H8O7S	149.262	243967	1	0	0	0	0	0	0.088065	0.0890359	0.0770887	0.375875	0.288661	0.44065	0.0741116	0.0850616	0	0	0	0	0
295.01	C12H8O9	1307.49	252287	1	0	0	0	0	0	4.73075	5.25792	5.27015	1.48474	2.15489	1.83659	2.82625	2.38957	10.4473	10.3412	9.88448	0	0
295.025	C16H8O6	2601.51	257531	1	0	0	0	0	0	11.0435	11.4826	12.1152	16.976	18.9585	17.5192	11.579	11.1533	12.0625	11.4419	11.3759	0	0
295.028	C13H12O6S	626.115	245287	1	0.0309572	0.0283392	0.0344048	0	0	0.439494	0.5658	0.488366	1.46668	1.69875	1.47526	0.643826	0.655228	0.230096	0.275736	0.43864	0	0
295.043	C17H12O3S	77.9363	209912	1	0	0	0	0	0	0.179768	0.365885	0.236676	0.411822	0.501088	0.378541	0.333122	0.379896	0.143589	0.192837	0.120832	0	0
295.046	C13H12O8	8389.24	260899	1	0.759289	0.896141	0.854216	0.472132	0.52019	37.3088	39.3846	38.806	23.8617	25.3986	24.4679	25.2442	25.3738	61.9882	60.2729	61.8529	0.154662	0.201536
295.057	C12H12N2O7	358.644	250785	1	0.0159347	0.0250984	0.0160403	0	0	1.11046	0.957576	1.08304	4.91421	5.39064	4.47685	1.60315	1.73331	0.358585	0.484054	0.433686	0.0407954	0.027716
295.061	C17H12O5	4146.89	260538	1	0.514058	0.548169	0.455507	0.0148793	0.00663988	17.346	18.0948	19.3121	28.1459	29.9459	29.1367	20.6838	20.5269	15.0657	14.2919	13.9092	0.0992664	0.0954657
295.065	C14H16O5S	2718.57	217948	1	1.19005	1.33107	1.12624	0.0650172	0.0840364	0.289597	0.402415	0.420006	2.05566	1.72484	2.09307	0.82489	0.842795	0.25418	0.259359	0.167835	0.048565	0.0371838
295.076	C21H12O2	70.97	192456	1	0	0	0	0	0	0.245008	0.162441	0.174163	0.85309	0.955773	1.03976	0.408371	0.454537	0.0942721	0.0978178	0.075469	0	0
295.082	C14H16O7	41160.2	260313	1	14.6891	16.6192	15.1851	25.4773	27.4174	62.4213	63.2419	67.229	57.003	62.1355	58.7217	62.3738	63.4869	73.2412	73.5917	72.7695	7.20006	7.1289
295.086	C11H20O7S	452.088	221590	1	0	0	0	0	0	0	0	0	1.6989	1.93619	1.80192	0.165201	0.209275	0.241186	0.180755	0.13602	0	0
295.094	C13H16N2O6	2615.7	259859	1	0.972145	1.04341	0.987359	1.59708	1.74236	0.742422	0.77157	0.79507	7.73487	7.89669	8.95969	4.12366	4.33678	0.435354	0.3988	0.490852	2.07802	2.07254
295.098	C18H16O4	2114.16	265405	1	1.91495	2.15689	1.98501	0.0371701	0.017771	9.32762	9.04256	9.84563	16.4337	15.3732	16.5018	11.6247	12.838	5.4199	5.12279	4.85905	0.722467	0.670161
295.119	C15H20O6	102407	261695	1	31.5097	35.0387	31.4611	66.2274	68.2149	49.7969	50.1871	52.9121	74.9948	80.6414	77.4882	75.3016	80.9933	83.668	85.0928	79.1882	16.1846	15.8412
295.13	C14H20N2O5	1889.98	256922	1	0.45975	0.540454	0.498384	1.21959	1.25894	0	0	0	0.701897	0.800052	0.616942	0.301958	0.326843	0	0	0	1.61753	1.54355
295.134	C19H20O3	1866.53	262448	1	2.35417	2.5132	2.36513	0.043147	0.0200532	3.4402	3.41643	3.18298	4.38321	5.65046	5.5806	4.06832	3.95369	1.09285	1.03168	0.904809	0.886327	0.877713
295.137	C16H24O3S	5760.22	241165	1	1.49362	1.70972	1.41145	0	0	0	0	0	0	0	0	0.0995255	0.151709	0	0	0	0	0
295.155	C16H24O5	15398.9	259848	1	8.94597	9.8105	8.95098	9.50825	10.2575	7.2557	7.17798	6.88936	23.1787	23.0338	23.1201	18.8563	21.157	15.4479	14.591	14.4635	3.9975	3.75297
295.166	C15H24N2O4	12.8472	256004	1	0	0	0	0.00802377	0.00784338	0	0	0	0	0	0	0	0	0	0	0	0	0
295.17	C20H24O2	832.027	256078	1	1.08783	1.16058	1.05875	0.0480118	0.0652655	0.408949	0.421668	0.321115	0.89604	0.857392	0.853431	0.552829	0.6266	0.0807011	0	0.145694	0.171371	0.169521
295.192	C17H28O4	333.695	253867	1	0.306858	0.287866	0.257448	0.106124	0.110952	0	0	0	0.3118	0	0.22365	0.289338	0.454947	0.553482	0.790875	0.520938	0.0260326	0.0160693
295.228	C18H32O3	355.289	263748	1	0	0	0	0	0	0	0	0	0	0	0	0.18926	0.153314	0	0	0	0	0
296.02	C15H7NO6	270.474	247923	1	0	0	0	0	0	0.390572	0.425854	0.317809	3.9281	3.49243	3.96265	0.515455	0.741054	0	0	0	0	0
296.023	C12H11NO6S	72.1549	198967	1	0	0	0	0	0	0	0	0	0.782977	0.495205	0.618338	0	0	0	0	0	0	0
296.041	C12H11NO8	481.277	253666	1	0	0	0	0	0	1.45713	1.39896	1.68973	2.22151	2.69506	2.23861	1.07824	1.15405	0.669967	0.732427	0.702039	0	0
296.056	C16H11NO5	1071.64	256285	1	0.0348385	0.0358818	0.0314919	0	0	2.68263	2.42199	2.62899	14.8355	15.3056	15.7004	5.2258	5.42486	0.407262	0.383786	0.318176	0.0196239	0.0201182
296.06	C13H15NO5S	67.9132	212014	1	0.0240654	0.0245396	0.0236544	0.0127459	0.0156776	0	0	0	0.411611	0.310671	0.380547	0	0	0	0	0	0.0292942	0.0152903
296.078	C13H15NO7	3444.89	263035	1	1.23154	1.38836	1.3121	2.14971	2.29469	4.85586	5.37195	5.15537	11.7158	13.2079	12.6452	8.77938	9.09156	2.54402	2.57116	2.65854	1.57696	1.74297
296.089	C12H15N3O6	125.688	206807	1	0	0	0	0.027162	0.0491204	0	0	0	0.847816	0.956569	1.07474	0	0	0	0	0	0	0
296.093	C17H15NO4	745.854	257291	1	0.293527	0.317142	0.324545	0.0186878	0.0146647	1.1384	0.839162	0.980283	7.38218	7.40509	6.90604	2.62924	2.64292	0	0	0	0.095154	0.121337
296.104	C16H15N3O3	93.5013	149148	1	0	0	0	0	0	0	0	0	0.595586	0	0.368898	0	0	0	0	0	0	0
296.114	C14H19NO6	8658.14	259977	1	2.0944	2.44014	2.14412	5.20445	5.76732	0.693956	0.520863	0.665084	5.96073	6.73054	6.56552	4.9359	5.24621	0.546226	0.371089	0.405636	3.66516	3.55301
296.125	C13H19N3O5	164.673	224993	1	0.0391453	0.0416608	0.030921	0.103808	0.109691	0	0	0	0.126639	0.167635	0.218784	0	0	0	0	0	0.0477659	0.0492013
296.129	C18H19NO3	490.799	251510	1	0.248309	0.249304	0.204258	0.0146282	0.0203089	0	0.061318	0.088967	0.681214	0.810479	0.794663	0.1459	0.216301	0	0	0	0.0950016	0.075792
296.15	C15H23NO5	1541.2	257399	1	0.268903	0.281532	0.242455	1.00253	0.965022	0	0	0	0.196279	0.238175	0.409439	0.111292	0.169567	0	0	0	0.193223	0.205512
297.004	C15H6O7	860.729	257779	1	0	0	0	0	0	4.10204	4.04083	3.95459	4.21672	4.51989	4.39364	2.64893	2.9711	4.89469	4.75986	4.66361	0	0
297.007	C12H10O7S	520.754	245566	1	0	0	0	0	0	0.251095	0.181706	0.279988	1.17602	1.15756	1.25634	0.198418	0.270933	0.0976601	0.0842453	0.161511	0	0
297.023	C16H10O4S	101.577	223551	1	0	0	0	0	0	0.504111	0.34457	0.408697	0.724669	0.846892	0.943129	0.387436	0.468266	0.210558	0.159134	0.278956	0	0
297.025	C12H10O9	3047.37	256925	1	0	0	0	0	0	13.9977	14.2917	14.1916	4.51746	4.42732	4.40641	8.47527	7.78215	22.8084	22.3654	23.4427	0	0
297.04	C16H10O6	4499	258218	1	0.118797	0.133362	0.10907	0	0	20.7462	20.3076	20.9518	31.582	32.5436	32.0404	21.0485	22.0153	21.7958	20.6893	20.5587	0.016525	0.0193662
297.044	C13H14O6S	1915.83	240961	1	0.266387	0.249625	0.229169	0.0261139	0.0340032	0.495536	0.536747	0.522183	2.99233	2.60925	3.02702	0.853787	0.87692	0.402654	0.235588	0.457912	0.0402547	0.0500095
297.047	C10H18O6S2	235.248	165050	1	0	0	0	0	0	0.117793	0.0999926	0.139117	0.331893	0.303102	0.286085	0	0	0	0	0	0	0
297.056	C20H10O3	126.395	214111	1	0	0	0	0	0	0.498417	0.542552	0.483612	1.70227	1.33618	1.47644	0.907993	0.93685	0.269026	0.187438	0.217604	0	0
297.062	C13H14O8	13153.4	259503	1	3.75665	4.01616	3.88566	5.99225	5.87243	59.5349	61.7505	60.3488	30.9824	33.1103	32.7583	31.8015	31.8489	63.0692	61.5681	63.2858	1.54079	1.55939
297.073	C12H14N2O7	295.775	255394	1	0.0576404	0.0441616	0.0739232	0.0526904	0.0628838	0.773029	0.928254	0.773117	3.59476	4.44568	3.87226	1.54514	1.79848	0.408248	0.398392	0.350467	0.0952125	0.079033
297.077	C17H14O5	3966.18	259454	1	1.75664	1.96796	1.84041	0.0289045	0.0313415	18.2851	18.1802	18.4705	29.803	29.3724	29.3367	21.9923	24.1977	15.6501	14.2228	13.576	0.706003	0.744885
297.08	C14H18O5S	28335.2	226873	1	9.41869	9.49196	9.23623	0.149085	0.177854	0.332056	0.266795	0.404585	2.30044	2.34829	2.42893	2.21567	2.13002	0.170458	0.173758	0.126889	0.0971638	0.100386
297.088	C16H14N2O4	735.148	233257	1	0.115756	0.121079	0.16944	0	0	0.403948	0.371074	0.41417	8.25356	7.55653	7.65501	1.89037	2.28766	0	0	0	0.14112	0.170544
297.092	C21H14O2	81.9182	223331	1	0.0305092	0.01287	0	0	0	0.362485	0.384578	0.329612	1.00672	0.772102	0.630178	0.465212	0.423819	0	0.0920605	0.069676	0	0
297.098	C14H18O7	89746.7	259709	1	23.966	25.2406	24.3238	57.3532	59.7816	73.3842	73.7613	73.8478	69.0794	70.422	70.2773	73.4892	76.0957	84.22	81.2384	81.655	11.4359	11.4258
297.109	C13H18N2O6	2171.58	253869	1	0.562826	0.595433	0.627327	1.32552	1.44652	0.174967	0.213389	0.268241	2.07181	2.43882	2.9214	1.45227	1.24372	0.0900549	0	0.081628	1.32292	1.30656
297.113	C18H18O4	3123.71	262519	1	4.0636	4.35721	3.83568	0.386443	0.403886	9.2142	9.42502	9.57405	17.0712	16.382	16.3064	12.1847	13.255	8.8006	8.61261	7.8696	2.07271	1.99472
297.117	C15H22O4S	894.139	222399	1	0.325933	0.377741	0.295496	0	0	0.125228	0.0687382	0.0667868	0.363199	0.39968	0.451527	0.161636	0.231354	0	0	0	0	0
297.134	C15H22O6	56926.3	259288	1	16.8803	17.9936	16.8913	36.6536	37.9195	24.0658	23.9306	24.834	49.8276	49.809	51.4499	48.2153	52.0835	60.0108	56.0537	54.6706	8.98272	8.63894
297.146	C14H22N2O5	130.347	239865	1	0.0349279	0.0394954	0.0266533	0.0847894	0.082815	0	0	0	0	0	0	0	0	0	0	0	0.0471611	0.0512564
297.15	C19H22O3	2823.33	261326	1	3.44639	3.93821	3.44272	0.634366	0.696851	3.81417	3.7381	3.64563	5.76713	6.51059	6.6608	5.61048	6.08378	1.49557	2.0056	1.83272	1.73447	1.60718
297.153	C16H26O3S	14341	259590	1	4.12924	4.55659	4.14777	2.56945	2.68457	0.0964904	0	0.114103	29.0808	28.8002	29.7699	17.7308	19.1789	24.4921	23.6164	22.4145	0.466816	0.307198
297.171	C16H26O5	2531.05	259364	1	1.54084	1.64967	1.48141	1.64643	1.67895	0.1818	0.204245	0.149804	3.12762	2.41469	2.92382	3.516	4.27577	2.91899	2.85999	2.83725	0.382337	0.361216
297.186	C20H26O2	839.639	256796	1	1.0006	1.1712	1.02619	0.0655183	0.0583655	0.267739	0.286333	0.159544	0.431131	0.617123	0.269045	0.324952	0.575469	0.121693	0.127264	0.0965452	0.135014	0.143525
298.003	C11H9NO7S	32.4923	207650	1	0	0	0	0	0	0	0.061127	0.0436863	0.363617	0.446553	0.476037	0.0758912	0.0659533	0	0	0	0	0
298.036	C15H9NO6	883.539	252638	1	0	0	0	0	0	2.10687	2.13017	2.09594	12.7246	12.4013	12.9445	3.00095	3.0455	0.394565	0.442004	0.392012	0	0
298.039	C12H13NO6S	101.44	224003	1	0	0	0	0	0	0	0	0	0.574358	0.565082	0.387028	0	0	0	0	0	0.0158821	0.0302083
298.051	C19H9NO3	62.0384	191900	1	0	0	0	0	0	0.155011	0.107298	0.163265	0.797135	0.875222	0.908909	0.232021	0.206158	0	0.118768	0.0755132	0	0
298.057	C12H13NO8	621.331	256280	1	0.0271984	0.0208743	0.029517	0.0421095	0.0441085	2.68456	2.91694	2.81638	3.21152	3.58701	3.15203	1.9431	1.59785	1.3587	1.11313	1.15978	0.0516495	0.0413468
298.072	C16H13NO5	1171.9	259865	1	0.255825	0.307031	0.284068	0.0153283	0.0206598	2.69688	2.6486	2.92644	16.1632	16.2845	17.1693	6.47812	6.6421	0.36082	0.514629	0.421589	0.14187	0.159764
298.075	C13H17NO5S	43.4726	185062	1	0.0295128	0.0314395	0.0319222	0.0282785	0.0241599	0	0	0	0.291997	0.264875	0	0	0	0	0	0	0	0
298.083	C15H13N3O4	3627.54	186221	1	1.0557	1.16413	1.13649	0.0133932	0.015316	0	0	0	1.58316	2.14208	1.81694	0	0	0	0	0	0	0
298.093	C13H17NO7	4705.25	262238	1	1.26156	1.47295	1.27776	3.01452	3.13424	1.58426	1.58868	1.95759	6.23196	6.96954	6.92756	5.64091	6.10466	1.32596	1.19229	1.06215	2.0251	2.11265
298.105	C12H17N3O6	51.8737	216625	1	0	0	0	0.0337434	0.0176619	0	0	0	0.336144	0.208772	0.293559	0	0	0	0	0	0	0
298.109	C17H17NO4	1039.2	257247	1	0.739153	0.777117	0.755736	0.106589	0.105519	0.491147	0.375426	0.480328	5.04581	5.50701	5.57519	2.03848	2.19257	0.0716859	0	0.0736487	0.396879	0.454409
298.12	C16H17N3O3	81.9615	170755	1	0	0	0	0	0	0	0	0	0.35866	0.244343	0.441335	0	0	0	0	0	0	0
298.13	C14H21NO6	3243.8	256352	1	0.544819	0.725476	0.575919	2.0764	2.16075	0	0	0	0.482069	1.05521	0.687694	0.860788	0.827075	0	0	0	0.920154	0.913712
298.145	C18H21NO3	518.82	257704	1	0.267992	0.297718	0.281211	0.0515771	0.0550376	0	0	0	0.285403	0.616913	0.355503	0.13956	0.0993434	0	0	0	0.112311	0.0958613
298.987	C11H8O8S	149.886	244401	1	0	0	0	0	0	0.0468738	0.112531	0.0776805	0.374809	0.309606	0.436345	0	0	0.0905897	0.107629	0	0	0
299.002	C15H8O5S	27.0645	218061	1	0	0	0	0	0	0.056543	0.0470256	0.102545	0.382109	0.386963	0.396515	0.0730921	0.0792406	0	0	0	0	0
299.017	C19H8O2S	41.3488	194877	1	0	0	0	0	0	0.100672	0.0586644	0.0423973	0	0.12629	0.122136	0.232083	0.306481	0	0	0	0	0
299.02	C15H8O7	2857.75	257454	1	0	0	0	0	0	12.8331	13.4162	13.1918	18.0549	18.8098	19.2798	10.8209	11.0766	16.021	15.7785	16.2834	0	0
299.023	C12H12O7S	1469.58	247189	1	0.0266634	0.0229805	0.0156001	0.0105549	0.00763535	0.638282	0.597228	0.458449	1.79021	1.63197	1.70056	0.490513	0.49505	0.290731	0.19698	0.229958	0.0269818	0.0154792
299.035	C19H8O4	100.439	207908	1	0	0	0	0	0	0.290911	0.288114	0.421015	1.34071	1.13596	1.053	0.661975	0.74446	0.295346	0.198274	0.194137	0	0
299.038	C16H12O4S	196.942	220640	1	0	0	0	0	0	0.97118	0.85854	0.917156	0.844557	1.21868	1.07544	0.616363	0.764459	0.438616	0.383213	0.460364	0	0
299.041	C12H12O9	7096.86	256335	1	0.078415	0.0669515	0.0403295	0.0919529	0.0942863	30.9881	31.3574	33.0501	9.23762	8.40433	9.57951	6.51677	6.24878	30.1814	30.4573	28.3644	0	0
299.056	C16H12O6	5847.17	257577	1	0.968624	1.11316	1.11466	0.0295172	0.0569343	26.3792	26.6158	27.2302	41.6134	41.8812	41.2384	30.6369	32.2292	29.3277	28.3721	26.6059	0.256776	0.301244
299.059	C13H16O6S	3537.76	241274	1	0.648426	0.732093	0.63679	0.262264	0.274272	0.505822	0.662089	0.542719	2.60732	2.95884	3.58426	0.857258	1.19284	0.210785	0.370248	0.257901	0.120591	0.135338
299.067	C15H12N2O5	917.91	237266	1	0.138183	0.146831	0.112042	0.0395686	0.037276	0.960683	1.04447	1.01797	12.8608	13.519	13.2367	3.50184	3.55085	0.49936	0.658736	0.49806	0.159395	0.136047
299.071	C20H12O3	634.169	230685	1	0.0283038	0.0289584	0.0173403	0.00621127	0.00783251	2.84154	2.97721	2.79708	4.15229	4.27423	4.39072	2.66492	2.63976	0.710287	0.87929	0.531015	0	0
299.075	C17H16O3S	56.9172	204958	1	0.0182299	0.0156142	0.0248644	0	0	0.212275	0.183865	0.265063	0.629312	0.633551	0.279592	0.197723	0.208399	0.0818027	0.134887	0.108406	0	0
299.077	C13H16O8	24173.3	258935	1	6.82736	7.29952	6.76245	15.7245	15.5939	64.5239	67.129	67.0594	36.7615	38.2328	37.3826	39.7489	38.4812	59.1792	58.7842	61.7757	3.57424	3.53812
299.088	C12H16N2O7	158.338	248777	1	0.0369409	0.0407985	0.0717516	0.102998	0.0951959	0.190538	0.247695	0.349434	1.63747	1.64509	1.91055	0.43886	0.511226	0.0787027	0.104638	0.0942544	0.0438702	0.0420834
299.093	C17H16O5	4030.98	256504	1	4.38932	4.81356	4.4944	0.898526	0.983142	17.3248	18.1722	18.7723	29.2185	30.8767	29.2986	24.6037	24.7001	15.3062	15.0509	15.0334	2.43243	2.24752
299.096	C14H20O5S	40825.8	246498	1	1.95363	2.20998	2.01276	0.474166	0.433021	0.276285	0.22959	0.296265	2.87191	2.38041	2.33802	6.86954	6.90027	0.273376	0.291997	0.271739	0.123203	0.169306
299.104	C16H16N2O4	928.394	225584	1	0.342129	0.358594	0.332498	0.108276	0.120912	0.325777	0.221557	0.235094	7.7056	8.03557	7.4666	2.23562	2.57183	0	0	0	0.416047	0.475526
299.108	C21H16O2	64.7986	245158	1	0.0172831	0.0225987	0.0114912	0	0	0.321585	0.287757	0.296024	0.689388	0.423969	0.559958	0.234401	0.293027	0.106765	0.144153	0	0	0
299.114	C14H20O7	55685	258922	1	12.7426	14.5291	13.3264	34.7492	37.0926	33.8535	34.5218	35.3245	46.5816	48.6305	48.3453	48.7163	52.4701	53.3515	53.7685	51.347	7.50509	7.34454
299.125	C13H20N2O6	319	250462	1	0.0776314	0.0627492	0.0771065	0.207507	0.153526	0	0	0	0.299667	0.243778	0.148508	0.161072	0.115145	0	0	0	0.0989215	0.0801326
299.129	C18H20O4	5775.67	258885	1	7.54807	7.98603	7.40081	1.77529	1.85677	10.0902	10.0706	10.2902	18.5093	17.9324	19.0558	14.5424	16.0571	8.02398	7.46064	7.60891	3.84291	3.77002
299.132	C15H24O4S	4066.85	246718	1	0.178443	0.162884	0.129868	0	0	0.114448	0.0867079	0.0480498	0.171892	0.224039	0	0.154063	0.0907031	0	0.0932078	0.0692886	0	0
299.14	C17H20N2O3	244.318	211335	1	0.061782	0.0929724	0.0541484	0	0	0	0	0	0.206466	0.348281	0.269217	0.0822148	0.0847042	0	0	0	0.0746066	0.0965161
299.15	C15H24O6	9807.93	258672	1	3.17879	3.33245	3.16134	6.37997	6.52022	3.04677	3.20864	2.69517	12.1078	13.2514	13.0966	13.1912	13.8439	14.383	14.556	14.4068	1.77479	1.74791
299.165	C19H24O3	3382.49	259129	1	4.30267	4.62828	4.33424	0.996477	1.01373	3.4026	3.48429	3.48512	7.01432	6.42489	7.5893	7.46933	7.54696	2.53641	2.66314	2.67538	1.7458	1.7423
299.186	C16H28O5	90.7948	253186	1	0	0	0	0.018912	0.0163538	0	0	0	0	0	0	0.145576	0.14276	0.0843784	0	0.0637082	0	0
299.202	C20H28O2	691.977	255448	1	0.668699	0.757536	0.64574	0.0176611	0.0237996	0.129952	0.17652	0.176143	0.30372	0.64787	0.248501	1.03036	1.28954	0	0	0	0.0617448	0.0859717
300.015	C14H7NO7	203.97	243561	1	0	0	0	0	0	0.311649	0.490037	0.344097	3.11278	2.90094	2.68213	0.561902	0.446695	0.117992	0.0837916	0.0677327	0	0
300.034	C15H11NO4S	51.8796	177822	1	0	0	0	0	0	0.0891138	0.0556941	0.102839	0.590065	0.478267	0.760076	0.160395	0.254438	0	0	0	0	0
300.036	C11H11NO9	34.4119	147056	1	0	0	0	0	0	0.147172	0.0953981	0.160256	0	0	0	0.137575	0.182814	0.121227	0.139368	0.102476	0	0
300.051	C15H11NO6	1284.32	256892	1	0.072232	0.0843831	0.0646003	0.00947361	0.00700304	3.8113	3.87348	4.26561	18.7674	18.7523	18.8162	5.88676	6.8066	1.28449	1.17461	1.17457	0.0523493	0.0686393
300.055	C12H15NO6S	119.402	223844	1	0.0286591	0.0117025	0.0179514	0.0206484	0.0153211	0	0	0	0.850752	0.53863	0.703132	0	0	0	0	0	0.0631393	0.0492943
300.063	C14H11N3O5	266.247	158335	1	0	0	0	0.0121577	0.00829276	0	0	0	2.21969	2.42099	1.9933	0	0	0	0	0	0.0379767	0.0216421
300.067	C19H11NO3	159.407	203721	1	0	0	0	0	0	0.246213	0.310631	0.215095	2.29611	2.15993	2.33543	0.369476	0.563629	0	0	0	0	0
300.073	C12H15NO8	399.452	247817	1	0.0342142	0.0296398	0.028014	0.147957	0.177396	1.24266	1.10194	1.13316	1.90693	2.20787	1.97475	0.91883	1.16209	0.680181	0.441452	0.534093	0.0600294	0.0566104
300.088	C16H15NO5	1339.55	260195	1	0.944961	1.16292	1.02048	0.23709	0.282704	2.31319	2.66395	2.72661	15.7303	15.2866	15.2031	6.52129	7.29755	0.438118	0.538634	0.502536	0.7436	0.694686
300.091	C13H19NO5S	280.598	175000	1	0	0	0	0.0192566	0.0123223	0	0	0	0.17781	0.15352	0	0	0	0	0	0	0.0138808	0.0215943
300.099	C15H15N3O4	5386.22	213842	1	0	0	0	0.0488784	0.0377587	0	0	0	1.51064	1.81241	1.71461	0	0	0	0	0	0.0392907	0.0613243
300.109	C13H19NO7	2014.46	255755	1	0.254443	0.317288	0.280851	1.19432	1.34186	0.101876	0.0780639	0.0969924	1.08686	0.989302	1.04873	0.853406	0.930344	0.106757	0.070381	0.0774604	0.508455	0.531636
300.124	C17H19NO4	1649.76	256592	1	1.21845	1.39894	1.17288	0.409093	0.46199	0.253221	0.179831	0.186004	3.95172	3.82686	3.91699	1.42087	1.5272	0	0	0	0.871743	0.658262
300.135	C16H19N3O3	479.864	203653	1	0	0	0	0.0156641	0.0104704	0	0	0	0	0	0	0	0	0	0	0	0	0
300.145	C14H23NO6	209.541	244449	1	0	0	0	0.136304	0.10208	0	0	0	0	0	0	0	0	0	0	0	0	0
300.161	C18H23NO3	435.395	252492	1	0.162994	0.24955	0.17352	0.0627921	0.0670905	0	0	0	0.272918	0.132175	0.187753	0	0	0	0	0	0.0534911	0.0513959
300.996	C18H6O3S	16.9096	213896	1	0	0	0	0	0	0	0	0	0	0	0	0.0737383	0.116562	0	0	0	0	0
300.999	C14H6O8	861.783	255845	1	0	0	0	0	0	3.37288	3.47113	4.01332	2.7374	2.67478	2.30316	1.5729	1.1589	4.09496	4.33613	3.38655	0	0
301.002	C11H10O8S	320.355	243026	1	0	0	0	0	0	0.201779	0.183051	0.199432	0.499482	0.405125	0.647657	0.0965798	0.148216	0.117659	0.12596	0.161937	0	0
301.014	C18H6O5	36.242	198854	1	0	0	0	0	0	0.0756708	0.129361	0.102222	0.310271	0.505155	0.373129	0.116491	0.268629	0.087135	0	0.0873309	0	0
301.017	C15H10O5S	151.995	233378	1	0	0	0	0	0	0.346049	0.539276	0.450599	0.776687	1.41112	1.19582	0.413257	0.377273	0.294815	0.218779	0.295793	0	0
301.02	C11H10O10	709.049	223401	1	0	0	0	0	0	2.79559	2.93687	2.99131	0.198188	0.522495	0.282536	0.115589	0.111266	1.69256	1.95593	1.7123	0	0
301.033	C19H10O2S	23.4856	189598	1	0	0	0	0	0	0	0	0	0.29722	0.214852	0.16844	0.178124	0.14826	0	0	0	0	0
301.035	C15H10O7	5387.2	257031	1	0.128503	0.169062	0.148485	0	0	23.6818	24.679	25.0882	32.9759	34.0555	33.4728	22.9314	23.687	32.6774	33.9712	31.692	0.0240135	0.026184
301.039	C12H14O7S	2076.65	246190	1	0.12391	0.0983441	0.106061	0.0616981	0.0640037	0.651025	0.653423	0.733591	2.0948	2.60434	2.50036	0.895037	0.832398	0.284418	0.375611	0.269516	0.0579619	0.0480266
301.051	C19H10O4	987.373	241902	1	0	0	0	0	0	4.53895	4.32028	4.59819	8.29189	8.12565	8.69876	5.43822	5.68616	2.35272	2.59474	2.3449	0	0
301.057	C12H14O9	6710.36	256744	1	0.213777	0.279105	0.173932	0.8286	0.826988	28.5405	30.3118	31.2501	11.8664	12.5922	12.758	8.94373	8.41557	28.2486	28.4564	28.2042	0.0719871	0.124992
301.062	C18H10N2O3	101.975	141600	1	0	0	0	0	0	0	0.160862	0.157285	1.318	1.53274	1.11202	0.121072	0.203383	0	0	0	0	0
301.066	C23H10O	34.2335	131260	1	0	0.0151616	0.0132042	0	0	0	0	0	0.303412	0.321487	0.423246	0	0	0	0	0	0.0139116	0.0228918
301.072	C16H14O6	6295.33	256851	1	3.29032	3.45337	3.45434	0.699972	0.688393	28.9566	28.6006	29.3173	44.124	43.2347	42.668	36.8072	38.7113	33.5328	31.7123	31.6549	1.61365	1.57041
301.075	C13H18O6S	4132.81	248017	1	0.637418	0.714121	0.665942	0.704797	0.660595	0.577051	0.68521	0.576985	2.99077	3.25505	3.15584	1.43097	1.41268	0.364969	0.307247	0.305177	0.657697	0.646588
301.083	C15H14N2O5	1446.7	242492	1	0.50756	0.528244	0.53265	0.0556685	0.070712	0.860927	0.930294	0.960689	15.6075	16.6711	16.6291	5.33414	5.23457	0.343849	0.201843	0.401734	0.63786	0.623459
301.087	C20H14O3	726.946	244285	1	0.0684321	0.055058	0.0592427	0	0	3.45022	3.31779	3.38538	4.25423	5.15206	4.52181	3.21992	3.39124	1.65093	1.33782	1.20308	0	0
301.093	C13H18O8	14772.1	259227	1	3.85716	4.40508	3.87463	9.20771	9.83992	27.8738	27.8446	30.306	23.5242	24.9202	25.5639	25.4885	25.5668	32.7463	33.5147	33.333	2.71961	2.61463
301.098	C19H14N2O2	31.1471	148197	1	0	0	0	0	0	0	0	0	0.459898	0.37871	0.435698	0	0	0	0	0	0	0
301.104	C12H18N2O7	51.4636	195907	1	0.0269857	0.0424431	0.0241551	0.0140599	0.0176254	0.0499778	0	0.0556849	0.229027	0.194007	0.200988	0.134924	0.188766	0	0	0	0	0
301.106	C10H23O8P	98.9554	135907	1	0	0	0	0.0388409	0.0659157	0	0	0	0	0	0	0	0	0	0	0	0	0
301.108	C17H18O5	8301.21	255621	1	10.5419	11.4989	10.637	3.29343	3.43176	19.1967	19.341	18.6344	31.9042	33.6356	31.7717	27.822	28.6653	17.0773	16.5194	16.4262	5.40775	5.33603
301.112	C14H22O5S	2033.74	250620	1	0.36572	0.328523	0.373449	0.161694	0.212301	0.10733	0.124253	0.124978	1.77307	1.32766	1.76583	0.206467	0.453738	0.247818	0.316973	0.247146	0.0581199	0.0466174
301.119	C16H18N2O4	1228.04	242229	1	0.646386	0.793238	0.724659	0	0	0.199826	0.117381	0.202492	5.1005	6.13913	5.3488	1.45855	1.98523	0	0	0	1.05153	1.13533
301.123	C21H18O2	58.4175	248201	1	0.0525951	0.0608708	0.0436698	0	0	0.193443	0.27425	0.223038	0.247502	0.381626	0.279215	0.202814	0.25488	0	0	0	0	0
301.129	C14H22O7	8844.07	258345	1	2.37926	2.54563	2.44629	5.39223	5.89117	4.35684	4.43392	4.24426	11.2483	12.6798	11.9657	12.1961	13.0997	13.7302	13.032	12.4498	2.05578	1.93289
301.145	C18H22O4	8442.62	257241	1	10.9881	11.7385	10.8182	3.2977	3.38342	10.3623	10.3404	10.8452	22.3574	21.8749	22.6494	17.5929	18.1196	10.8807	10.8526	9.93817	4.95656	4.91659
301.148	C15H26O4S	630.733	254835	1	0.02781	0.0123821	0.0292931	0	0	0	0	0	0	0	0	0	0	0	0	0	0	0
301.156	C17H22N2O3	110.043	237365	1	0.0523524	0.0539822	0.0514374	0.0305768	0.0359563	0	0	0	0	0	0	0	0	0	0	0	0.0609146	0.032365
301.166	C15H26O6	580.316	246707	1	0.0561505	0.0758973	0.0304552	0.37749	0.373194	0	0	0	0.156393	0.214098	0.240283	0.695053	0.731782	0.938815	0.665969	0.766914	0.0309297	0.0227559
301.181	C19H26O3	2815.63	258284	1	3.43038	3.92747	3.50566	0.824639	0.871353	1.60932	1.68653	1.81467	5.35227	6.07314	6.07932	4.69445	5.23868	2.35557	1.95119	1.72986	1.2952	1.07072
301.217	C20H30O2	324.746	254398	1	0.100738	0.139095	0.129784	0	0	0	0	0	0.210614	0.166476	0.192869	0.339461	0.389747	0	0	0	0	0
302.013	C14H9NO5S	59.5803	196693	1	0	0	0	0	0	0.0630514	0.0554668	0	0.56499	0.710219	0.872897	0.227747	0.199588	0	0	0	0	0
302.031	C14H9NO7	633.082	250646	1	0	0	0	0	0	1.95705	1.67224	1.83417	8.91245	9.29231	9.27513	2.25512	2.44379	0.515514	0.585267	0.571096	0	0
302.034	C11H13NO7S	65.3509	193932	1	0	0	0	0	0	0	0	0	0.421502	0.728322	0.641247	0	0	0	0	0	0	0
302.046	C18H9NO4	206.529	215228	1	0	0	0	0	0	0.290593	0.377881	0.306902	3.15184	2.66812	2.87491	0.571247	0.575269	0	0	0	0	0
302.067	C15H13NO6	1438.76	258802	1	0.504668	0.543499	0.501363	0.133492	0.139763	4.50763	4.80346	4.89608	21.0578	21.1643	21.0789	10.1074	9.73872	1.55172	1.787	1.70844	0.39909	0.427344
302.07	C12H17NO6S	100.71	192269	1	0	0	0	0.0353741	0.0522385	0	0	0	0.748087	0.47773	0.633733	0	0	0	0	0	0.033913	0.0291475
302.078	C14H13N3O5	521.932	225992	1	0	0	0	0.0466072	0.0419059	0	0	0	3.92259	3.40649	3.47176	0	0	0	0	0	0.0811395	0.0518458
302.082	C19H13NO3	224.517	227847	1	0.0118544	0.0169923	0.0219287	0	0	0.366536	0.376938	0.366488	2.55012	3.37463	2.98709	0.465275	0.478118	0	0	0	0	0
302.088	C12H17NO8	84.363	191115	1	0	0	0	0.0306223	0.0355783	0.0928148	0.0795989	0.0593282	0.334498	0.300388	0.465021	0.175431	0.154145	0	0	0	0.0204871	0.0117819
302.103	C16H17NO5	2193.15	258029	1	2.00158	2.30728	1.92905	1.01833	1.16342	1.5896	1.76577	1.59597	13.8293	12.9661	13.3173	6.56077	7.18972	0.605337	0.351253	0.420574	1.98623	1.85963
302.115	C15H17N3O4	247.79	216551	1	0	0	0	0.0955912	0.0890234	0	0	0	0.924866	0.980888	1.16074	0	0	0	0	0	0.1532	0.149087
302.125	C13H21NO7	62.4041	217071	1	0	0	0	0.0312278	0.0415683	0	0	0	0	0	0	0	0	0	0	0	0	0
302.14	C17H21NO4	1540.38	255535	1	1.21963	1.31654	1.28686	0.695472	0.736314	0	0	0	1.65284	2.3033	2.14502	0.7687	0.929355	0	0	0	0.762572	0.789227
302.176	C18H25NO3	170.921	249901	1	0.0523667	0.0598035	0.0565984	0.0142667	0.0295274	0	0	0	0	0	0	0	0	0	0	0	0	0
303.012	C18H8O3S	29.7379	206970	1	0	0	0	0	0	0.0668089	0.0774152	0.0533339	0.24404	0.275934	0.189608	0.147742	0.22042	0.0768937	0.0915733	0	0	0
303.015	C14H8O8	2370.77	253040	1	0	0	0	0	0	10.1679	10.7707	11.0407	12.3469	14.0167	12.2302	7.82253	8.5098	17.1574	17.0315	16.8597	0	0
303.018	C11H12O8S	497.584	239406	1	0	0	0	0	0	0.335998	0.388249	0.51303	0.832212	0.752556	0.695765	0.276114	0.213907	0.243697	0.327415	0.192582	0	0
303.03	C18H8O5	782.19	252775	1	0	0	0	0	0	3.51791	3.48224	3.64266	6.96215	6.96898	6.51795	5.00936	4.73091	3.56172	2.7692	2.57996	0	0
303.033	C15H12O5S	351.156	237083	1	0	0	0	0	0	1.02877	1.20573	1.12345	1.79377	1.85139	1.87697	0.890342	1.23486	0.835186	1.09432	0.911986	0	0
303.036	C11H12O10	927.447	199921	1	0	0	0	0	0	3.81088	3.52884	3.86251	0.522355	0.422652	0.409565	0.252237	0.193841	2.24507	2.75585	2.40922	0	0
303.041	C17H8N2O4	88.3894	201397	1	0	0	0	0	0	0	0	0	1.29706	1.00556	1.29497	0	0	0	0	0	0	0
303.049	C19H12O2S	44.2236	186999	1	0	0	0	0.028767	0.01852	0.0477852	0	0.0557356	0.211955	0	0.158591	0.271004	0.10247	0	0	0	0	0
303.051	C15H12O7	7752.52	257120	1	1.29492	1.39841	1.20526	0.135468	0.162082	34.2872	34.6696	36.1035	45.3272	45.2165	45.2494	36.2891	37.7159	49.8497	50.8226	47.3294	0.484533	0.397836
303.054	C12H16O7S	1177.89	250155	1	0.142326	0.170452	0.129347	0.408926	0.489157	1.21405	1.16495	1.21516	5.19744	5.768	5.22474	1.60249	1.64099	0.471574	0.288714	0.369837	0.229189	0.282644
303.062	C14H12N2O6	1173.59	249718	1	0.191982	0.207031	0.178286	0.0558538	0.0294649	1.40107	1.50045	1.58796	16.3534	16.1161	17.1939	4.33115	4.98837	0.609415	0.689597	0.493425	0.273258	0.276633
303.066	C19H12O4	1824.18	253106	1	0.0536505	0.106402	0.0651935	0	0	8.00612	8.5639	8.43302	13.2957	13.2193	13.2222	9.19567	9.90522	4.45795	4.5264	3.91829	0	0
303.07	C16H16O4S	199.528	214952	1	0.113784	0.153236	0.0937492	0	0	0.589912	0.554787	0.464943	1.48495	1.95447	1.31619	0.713089	0.727445	0.240796	0.355594	0.31398	0.0182045	0.0115914
303.072	C12H16O9	2012.03	256367	1	0.0454729	0.0598663	0.0410662	0.328213	0.349283	8.32041	8.61603	9.37	3.98151	4.29685	4.3586	3.61253	3.4844	11.6441	12.3407	11.774	0.081118	0.0849141
303.087	C16H16O6	7731.59	255667	1	9.52765	10.7847	9.42219	4.12553	4.52334	29.354	30.3464	31.6866	46.5186	47.2693	49.0484	42.5619	45.7403	34.023	35.0996	32.7977	4.75538	4.88392
303.091	C13H20O6S	1662.1	251007	1	0.58079	0.628842	0.530447	0.518846	0.598735	0.500297	0.408631	0.453702	3.57528	3.89751	4.30176	1.35091	1.43412	0.351134	0.460027	0.389146	0.745291	0.763708
303.099	C15H16N2O5	1984.93	253576	1	1.25729	1.66572	1.42747	0.772221	0.854909	0.983579	1.1022	1.19953	16.4287	17.0086	16.1746	6.5733	6.54636	0.426822	0.378661	0.376974	2.11282	2.08736
303.103	C20H16O3	655.826	253472	1	0.220223	0.175896	0.206391	0	0	3.25476	2.99186	2.73485	3.46109	3.57421	3.46437	2.25642	2.8681	0.77826	0.733749	0.830197	0	0
303.109	C13H20O8	2521.4	244569	1	0.366156	0.42389	0.335888	1.40264	1.47992	2.99484	2.69045	3.06177	3.76535	3.93451	3.31397	5.66994	5.28704	7.11985	7.79645	6.87115	0.427996	0.382006
303.124	C17H20O5	15877.1	255736	1	19.2224	22.1467	19.3505	9.34497	10.2547	20.426	21.1649	21.9539	38.3243	41.0297	40.4727	33.3706	34.9098	21.6025	21.3759	20.4564	9.43013	9.12198
303.127	C14H24O5S	480.111	261238	1	0.0426826	0.0568241	0.031322	0	0	0	0	0	0.317275	0.220043	0.33716	0.100381	0.0704074	0	0	0	0	0
303.135	C16H20N2O4	1051.52	251113	1	0.63433	0.678468	0.567059	0.626675	0.678058	0	0	0	1.27327	1.57485	1.43542	0.517639	0.630147	0	0	0	1.18848	1.15043
303.139	C21H20O2	122.482	252074	1	0.103198	0.127463	0.0905515	0	0	0.152295	0.146557	0.160984	0.318444	0.229833	0.344172	0.124868	0.120966	0	0	0	0	0
303.145	C14H24O7	359.449	242782	1	0.0296671	0.0306629	0.0255271	0.224165	0.239435	0	0	0	0	0.19557	0.156616	0.212213	0.292578	0.341506	0.395069	0.267645	0.0426617	0.0613583
303.16	C18H24O4	8643.53	256160	1	10.7645	12.0567	10.4575	3.86303	4.19032	8.35804	8.1868	8.69873	20.2075	20.8885	20.492	16.3811	16.8735	9.37868	9.45435	8.80318	4.6971	4.42329
303.197	C19H28O3	1288.2	255258	1	1.6086	1.79688	1.62523	0.270682	0.267697	0.280934	0.379968	0.239405	1.64867	1.54442	1.82576	1.43548	1.36546	0.540884	0.588984	0.351847	0.253548	0.211622
304.01	C13H7NO8	64.5729	233093	1	0	0	0	0	0	0.15081	0.226064	0.164281	0.929948	0.79624	0.946041	0.184062	0.19634	0.114232	0.135886	0	0	0
304.025	C17H7NO5	94.6174	204581	1	0	0	0	0	0	0.166605	0.182346	0.117238	1.44395	1.04745	1.15827	0.270264	0.243303	0	0	0	0	0
304.029	C14H11NO5S	59.5234	211860	1	0	0	0	0	0	0	0	0	0.901485	0.691698	0.872063	0	0	0	0	0	0	0
304.046	C14H11NO7	1036.87	255615	1	0.0302433	0.0466002	0.0561549	0.00782073	0.00654211	4.04618	4.31355	4.11495	15.8236	15.5319	15.0771	5.68895	5.6251	1.96311	1.75765	1.70025	0.056628	0.053704
304.058	C13H11N3O6	159.96	155195	1	0	0	0	0	0	0	0	0	2.38114	2.26311	2.34354	0	0	0	0	0	0.0139266	0.0136894
304.062	C18H11NO4	488.247	235430	1	0	0	0	0	0	1.02918	0.949314	0.935214	6.81578	6.46896	7.15318	1.52841	1.62457	0	0	0	0	0
304.083	C15H15NO6	1907.73	257721	1	1.78081	1.95904	1.7585	1.20415	1.27077	4.48209	4.55216	4.88118	21.1162	23.0456	22.11	11.4082	11.5408	2.47104	1.99456	2.17616	1.87836	2.0193
304.094	C14H15N3O5	371.775	243945	1	0	0	0	0.167509	0.155439	0	0	0	2.5845	3.16633	3.18217	0	0	0	0	0	0.156731	0.177107
304.098	C19H15NO3	129.525	234231	1	0.0366929	0.0150567	0.02742	0	0	0.191357	0.226204	0.265817	1.82232	1.94684	1.78726	0.430059	0.221775	0	0	0	0	0
304.119	C16H19NO5	3571.57	255660	1	2.68936	3.11441	2.75168	2.18341	2.37908	0.67921	0.729186	0.731942	10.4888	10.2358	10.213	4.71633	5.33055	0.266889	0.332813	0.279663	2.98335	2.78622
304.13	C15H19N3O4	140.319	197269	1	0	0	0	0.0809636	0.0934685	0	0	0	0.193842	0	0.258494	0	0	0	0	0	0.138571	0.124145
304.155	C17H23NO4	1041.08	252734	1	0.750524	0.775331	0.71002	0.553323	0.582835	0	0	0	0.569043	0.922344	1.01191	0.247467	0.262772	0	0	0	0.336258	0.322854
304.994	C13H6O9	365.855	241728	1	0	0	0	0	0	1.10478	1.16754	1.2593	0.393747	0.902027	0.568943	0.292606	0.291311	2.87172	2.89361	2.72183	0	0
305.007	C10H11O9P	28.1234	180602	1	0	0	0	0	0	0	0	0	0	0	0	0.2133	0.150947	0	0	0	0	0
305.009	C17H6O6	237.734	245404	1	0	0	0	0	0	0.865971	0.967027	0.854337	1.25762	1.33718	1.6291	1.34926	1.7621	1.18072	1.06128	0.943427	0	0
305.013	C14H10O6S	232.828	231582	1	0	0	0	0	0	0.305421	0.428381	0.275505	1.31145	1.24386	1.07901	0.248871	0.284316	0.084423	0.196932	0.209773	0	0
305.028	C18H10O3S	33.2521	203178	1	0	0	0	0	0	0.0523526	0.065872	0.0769267	0.50746	0.347137	0.300703	0.24885	0.241367	0.0937281	0.126518	0	0	0
305.03	C14H10O8	5212.08	254178	1	0.0251358	0.0684609	0.0862208	0	0	22.4157	23.4672	23.8364	25.766	25.0111	26.1761	18.393	19.8555	41.1777	41.2233	39.2245	0.0262251	0.0152351
305.034	C11H14O8S	509.049	237387	1	0	0	0	0.0128004	0.00617739	0.890304	0.805942	0.940745	1.95188	2.12057	2.25195	0.420233	0.562342	0.30856	0.27569	0.348841	0	0
305.041	C13H10N2O7	447.365	241689	1	0	0	0	0	0	0.70138	0.760008	0.820372	6.82723	6.3347	5.78993	1.28064	1.54314	0.366443	0.427905	0.420003	0.0255858	0.0186318
305.046	C18H10O5	2491.86	255084	1	0.0163965	0.0280144	0.0324021	0	0	10.7892	11.182	11.6046	16.5759	18.5039	17.6821	11.48	11.9404	8.12204	7.46874	7.67178	0	0
305.049	C15H14O5S	476.841	232790	1	0.0836202	0.1144	0.0796875	0	0	1.04659	1.08043	0.929799	1.93613	2.38109	2.31161	1.32987	1.22533	0.88412	0.962418	0.875035	0	0
305.064	C19H14O2S	391.737	188190	1	0	0	0	0.254822	0.208544	0	0	0	0.190461	0	0.320083	0	0	0	0	0	0	0
305.067	C15H14O7	9422.88	255215	1	4.65426	5.19106	4.68606	2.26963	2.35683	41.0849	43.1192	43.8823	48.4827	52.6556	50.6173	48.5894	47.5461	58.4291	58.1901	58.0211	2.42369	2.4869
305.07	C12H18O7S	1362.25	258655	1	0.241587	0.248341	0.262776	0.570412	0.599381	0.959565	0.88744	0.904556	8.08059	7.72234	9.08112	2.00254	2.08877	0.585375	0.440374	0.60559	0.245638	0.243751
305.078	C14H14N2O6	1573.83	255165	1	0.842694	0.892307	0.913502	0.482742	0.477797	1.98713	2.14022	2.0582	19.219	19.5288	20.6595	7.2219	7.18577	0.734502	0.624448	0.770411	1.10462	1.12386
305.082	C19H14O4	1933.27	252802	1	0.332089	0.322316	0.324483	0	0	9.05458	9.02737	9.00325	13.0971	13.7282	13.5879	10.2846	10.048	4.7529	4.68612	4.13983	0.0319135	0.0201782
305.088	C12H18O9	126.482	214077	1	0	0	0	0	0	0	0	0	0	0	0	0	0	0	0.670433	0.831374	0	0
305.093	C18H14N2O3	145.865	181339	1	0.0122712	0.0297041	0	0	0	0.106632	0.106237	0	1.62719	1.81503	1.81882	0.179167	0.262622	0	0	0	0	0
305.103	C16H18O6	29474.6	255896	1	23.8188	25.6264	24.0698	19.173	19.346	36.4766	36.3613	36.1168	56.8295	56.8918	57.2582	53.5739	55.6393	41.3887	39.4263	38.9718	11.9517	11.9195
305.106	C13H22O6S	873.383	247683	1	0.0438781	0.0797868	0.0507859	0.0232895	0.0189974	0.0703131	0.0543457	0.0584904	1.50517	1.63748	1.46238	0.313842	0.344494	0.17385	0.142076	0.13794	0.0391657	0.0483126
305.114	C15H18N2O5	2778.68	253465	1	1.86486	2.11168	1.86445	1.73908	1.85092	0.453311	0.613571	0.558285	9.98193	10.7578	10.2677	4.87153	5.21612	0.132606	0.272257	0.182178	3.77657	3.77014
305.118	C20H18O3	547.338	256544	1	0.529809	0.593966	0.549953	0	0	2.38401	2.29133	2.22236	2.33209	2.98378	2.71875	2.03413	2.13996	0.277116	0.0930686	0.360248	0.0536908	0.0534746
305.124	C13H22O8	61.8025	220440	1	0	0	0	0.00870647	0.0117312	0	0	0	0	0	0	0	0	0.0727075	0.16226	0	0	0
305.139	C17H22O5	26230.1	255696	1	25.6748	28.0275	25.5743	16.5973	17.4723	20.4308	20.3116	21.6974	44.6573	44.1284	44.2058	35.3121	39.2609	23.3655	22.9311	22.4248	11.2858	10.913
305.151	C16H22N2O4	583.287	253944	1	0.20839	0.296765	0.247026	0.361396	0.388536	0	0	0	0	0.172741	0.20419	0	0	0	0	0	0.338629	0.431641
305.155	C21H22O2	216.354	248042	1	0.274191	0.269039	0.221203	0	0	0.222785	0.0869546	0.204954	0.232309	0.352769	0.300701	0.108809	0.186992	0	0	0	0.0141288	0.0126101
305.176	C18H26O4	5074.26	254945	1	6.75386	7.04913	6.50204	2.33914	2.41702	3.94961	3.94076	4.11609	14.7339	14.2745	14.2598	9.53041	10.3005	5.02375	4.87695	4.50357	2.67844	2.61509
305.212	C19H30O3	190.154	249364	1	0.245006	0.265243	0.20594	0.00867783	0.0108849	0	0	0	0.206936	0.176376	0.123603	0.150752	0.159921	0	0.0658295	0.0647171	0.0176025	0.014059
306.008	C13H9NO6S	62.2955	211884	1	0	0	0	0	0	0	0	0	0.861985	0.803167	0.912676	0.219552	0.291946	0	0	0	0	0
306.026	C13H9NO8	309.897	248973	1	0	0	0	0	0	0.909288	0.715592	0.929336	2.86523	3.36683	3.46463	0.957327	1.14878	0.446719	0.416417	0.504156	0	0
306.041	C17H9NO5	527.248	239133	1	0	0	0	0	0	1.11489	1.01134	0.985445	6.50962	6.90099	7.72457	1.43342	1.44902	0.0838399	0.127155	0.0988664	0	0
306.044	C14H13NO5S	73.4491	196700	1	0.0131411	0.019764	0.0119793	0	0	0	0	0	0.763382	0.849485	0.735414	0	0	0	0	0	0	0
306.062	C14H13NO7	1383.19	258067	1	0.467895	0.57276	0.550944	0.362615	0.327855	6.06025	6.03052	5.84918	18.772	19.4072	19.0718	9.89777	10.2523	2.94121	3.09635	3.26824	0.502376	0.522091
306.073	C13H13N3O6	205.174	189034	1	0	0	0	0.0387556	0.0563999	0	0	0	2.88047	2.77333	3.00595	0	0	0	0	0	0	0
306.077	C18H13NO4	527.873	238880	1	0.0465787	0.0263004	0.0360071	0	0	1.00979	1.17454	1.17751	6.76122	7.93425	7.08754	2.02987	1.92751	0	0.06605	0.101148	0.0151102	0.0240034
306.098	C15H17NO6	5602.91	255250	1	3.37431	3.52471	3.48997	3.63097	3.73218	3.53795	3.72249	3.56137	19.1469	19.5808	19.5986	11.9388	12.1154	2.11963	1.90081	1.95014	4.72102	4.74105
306.11	C14H17N3O5	578.433	231329	1	0	0	0	0.374232	0.385303	0	0	0	1.75706	1.64081	1.56487	0	0	0	0	0	0.359532	0.308076
306.114	C19H17NO3	133.773	241664	1	0.0300068	0.0403217	0.0501131	0	0	0.116862	0.0810386	0.0980915	0.854217	0.809886	0.956293	0.137322	0.169605	0	0	0	0	0
306.135	C16H21NO5	4254.6	253310	1	2.38079	2.55088	2.47817	2.76758	2.72468	0.128148	0.101467	0.194142	4.80551	5.12534	4.36275	2.77637	2.66353	0.0924863	0.121455	0.117689	2.82736	2.67609
306.146	C15H21N3O4	84.7151	206640	1	0	0	0	0.0551064	0.0498192	0	0	0	0	0	0	0	0	0	0	0	0.0405966	0.0457828
306.171	C17H25NO4	287.623	249862	1	0.146957	0.141586	0.128633	0.171805	0.160421	0	0	0	0	0	0	0.0817349	0.0941038	0	0	0	0.0431556	0.0272491
306.992	C13H8O7S	54.5389	236095	1	0	0	0	0	0	0.126753	0.101055	0.092061	0.414829	0.503929	0.420786	0	0	0	0	0	0	0
307.007	C17H8O4S	18.6691	211148	1	0	0	0	0	0	0	0	0	0.248297	0.263287	0.273516	0.139395	0.095105	0	0	0	0	0
307.01	C13H8O9	1830.86	251931	1	0	0	0	0	0	6.71089	7.02184	6.99578	3.87451	3.58052	3.07196	3.66289	3.23765	14.9077	14.1955	14.2805	0	0
307.025	C17H8O6	1824.77	255562	1	0	0	0	0	0	8.14974	8.56668	8.22513	13.1501	13.1245	12.9999	8.614	8.19957	7.43354	7.75133	7.2416	0	0
307.028	C14H12O6S	1112.67	235198	1	0.0178033	0.0205595	0.0230879	0	0	0.759594	0.789891	0.745958	1.52788	2.2981	2.22885	0.72883	0.858966	0.530467	0.533407	0.434511	0	0
307.043	C18H12O3S	49.6188	202688	1	0	0	0	0	0	0.177865	0.173595	0.114546	0.340575	0.501508	0.387676	0.269831	0.367779	0.0888086	0.0857101	0.117917	0	0
307.046	C14H12O8	9029.32	255415	1	0.975773	1.11346	1.00514	0.32867	0.330971	38.2749	39.5385	42.0495	32.9854	36.1079	34.8518	29.5964	30.1605	63.9665	65.7059	62.4087	0.276848	0.236233
307.049	C11H16O8S	505.664	246107	1	0.0190991	0.020167	0.0120687	0.0267113	0.0401755	0.727845	0.883258	0.881182	3.88383	3.48014	3.65387	1.1383	1.13127	0.287022	0.22375	0.299245	0.0257086	0.0364536
307.057	C13H12N2O7	696.74	249300	1	0.0571978	0.0624595	0.0620646	0.0271679	0.02544	1.6891	1.59056	1.73929	9.80228	10.4724	9.88023	3.07779	3.08961	0.608611	0.674932	0.74382	0.0586264	0.0807781
307.061	C18H12O5	3316.89	256071	1	0.250456	0.281647	0.284637	0	0	14.78	14.9321	15.4467	24.829	23.7085	24.2508	17.1348	17.4905	11.8611	11.4228	10.2255	0.04051	0.0430585
307.065	C15H16O5S	933.974	217048	1	0.720257	0.858532	0.734159	0.0317745	0.0323672	0.567091	0.627113	0.637707	2.41434	2.20932	2.39417	0.916738	1.21852	0.851225	0.565712	0.520693	0.0354288	0.0249476
307.082	C15H16O7	26826.6	255645	1	15.4736	16.7527	15.9868	17.4504	17.5291	53.3562	53.8314	53.9396	61.5857	62.2035	62.5128	62.4088	64.2303	71.7148	69.5216	68.7031	8.295	8.11858
307.086	C12H20O7S	840.318	259418	1	0.0643211	0.0561201	0.0663325	0	0	0.208634	0.263381	0.155933	4.2295	3.94604	3.55297	1.03017	0.817408	0.325074	0.270752	0.218759	0.0506973	0.0802239
307.094	C14H16N2O6	3160.12	254466	1	1.94418	2.09793	1.95883	2.03769	2.105	1.50202	1.63187	1.75263	16.2022	17.4268	16.7477	7.58167	7.78315	0.892163	0.706766	0.765895	3.48192	3.57913
307.098	C19H16O4	1666.56	259396	1	0.993258	1.07033	0.992131	0	0	8.07991	7.74155	7.76117	11.8339	11.8397	12.3923	8.79201	9.24466	3.76215	3.36676	3.22137	0.13539	0.191107
307.105	C13H16N4O5	27.3046	202191	1	0	0.0138375	0.0182904	0	0	0	0	0	0.152289	0.231388	0.137243	0	0	0	0	0	0	0
307.119	C16H20O6	79803.2	255937	1	39.4661	45.8783	39.5565	49.1014	53.1581	42.8311	44.1454	45.5988	70.2992	74.795	72.1072	69.8674	70.2867	53.7227	52.6768	53.0541	20.2274	19.7367
307.13	C15H20N2O5	3083.11	253922	1	1.32501	1.48578	1.38907	1.97423	2.05371	0.0762862	0.104241	0.0590209	2.15661	2.60213	2.69456	1.34592	1.46704	0	0	0	3.58487	3.57159
307.134	C20H20O3	1104.74	257397	1	1.29925	1.23478	1.1946	0	0	1.86535	1.92132	2.13748	2.77305	2.69477	2.70123	1.78865	2.11619	0.419769	0.3611	0.280563	0.146641	0.162746
307.137	C17H24O3S	3599.43	237903	1	0.823861	0.867886	0.765443	0	0	0	0	0	0	0	0	0	0	0	0	0	0	0
307.155	C17H24O5	21188.7	254163	1	18.7626	20.4214	18.8511	13.6655	14.1141	13.3622	13.0353	13.6756	40.2261	38.4916	38.166	27.583	31.4506	18.3213	17.9186	16.9069	7.90031	7.41889
307.166	C16H24N2O4	72.9428	249716	1	0.0173113	0.0142074	0.025195	0.034084	0.0485883	0	0	0	0	0	0	0	0	0	0	0	0	0
307.17	C21H24O2	415.333	250290	1	0.418127	0.526119	0.423777	0.0101671	0.0153009	0.211241	0.148098	0.234441	0.261583	0.338746	0.177658	0.162112	0.316981	0	0	0	0.0603722	0.0772093
307.192	C18H28O4	1648.2	252829	1	2.15351	2.29905	2.10124	0.747637	0.712944	0.302443	0.321448	0.304244	3.42015	3.44468	3.20991	2.32904	2.82155	1.37504	0.905364	1.31476	0.558428	0.48988
307.195	C15H32O4S	707.908	256951	1	0	0	0	0	0	0	0	0	0	0	0	0	0	0.990374	0.667782	0.963951	0	0
308.017	C20H7NOS	59.2458	215551	1	0	0	0	0	0	0.184129	0.186698	0.160472	0.13707	0.148819	0.196405	0.232537	0.278167	0.413014	0.38564	0.462111	0	0
308.02	C16H7NO6	170.428	230498	1	0	0	0	0	0	0.289556	0.2237	0.339621	2.1007	2.31595	2.4969	0.315098	0.348922	0	0	0	0	0
308.023	C13H11NO6S	74.2816	217551	1	0	0	0	0	0	0	0	0	1.1142	0.934382	0.916835	0.343693	0.336581	0	0	0	0	0
308.039	C17H11NO3S	27.0866	153272	1	0	0	0	0	0	0.0593631	0.0530919	0.0704757	0.285743	0.344385	0.39684	0.101173	0.116628	0	0	0	0	0
308.041	C13H11NO8	765.675	251868	1	0.0140003	0.0197981	0	0	0	2.82743	2.82898	2.79603	5.9285	7.33343	6.63978	2.59994	2.65174	0.890488	1.09901	1.38221	0	0
308.053	C12H11N3O7	75.7225	149277	1	0	0	0	0	0	0	0	0	1.1241	1.04263	1.10939	0	0	0	0	0	0	0
308.056	C17H11NO5	861.803	245929	1	0.0127798	0.0237811	0.0232381	0	0	2.02546	2.13195	1.90566	11.7659	12.7937	12.6261	3.58978	3.9507	0.2146	0.248513	0.17329	0	0
308.06	C14H15NO5S	128.914	207113	1	0.0529286	0.0523458	0.0406106	0.0147783	0.00783541	0	0	0	0.619227	0	0.559573	0	0	0	0	0	0	0
308.078	C14H15NO7	3508.85	255956	1	1.82658	2.0715	1.86701	2.24167	2.3373	5.9773	6.21899	6.1464	19.2366	20.2297	21.2875	12.5601	12.459	3.73635	4.11435	3.80303	2.83338	2.79947
308.089	C13H15N3O6	246.698	225729	1	0	0	0	0.124323	0.116975	0	0	0	2.42164	2.50632	2.56753	0	0	0	0	0	0.0556678	0.0893855
308.093	C18H15NO4	448.62	245152	1	0.128422	0.140571	0.0846313	0	0	0.72807	0.831148	0.661164	4.44727	5.50451	5.89194	1.81752	1.72324	0	0	0	0.0489621	0.0501945
308.114	C15H19NO6	10408.4	254340	1	3.97723	4.30302	4.0341	6.77058	6.92602	1.51413	1.85599	1.67625	12.4716	13.8716	14.0173	9.71834	9.55339	1.25397	1.09829	1.50901	6.37393	6.42758
308.125	C14H19N3O5	435.321	218741	1	0	0	0	0.283172	0.2891	0	0	0	0.457895	0.592948	0.439529	0	0	0	0	0	0.297326	0.300742
308.129	C19H19NO3	210.717	243936	1	0.0934087	0.0942218	0.0888693	0	0	0.0472274	0	0.0488101	0.598789	0.461009	0.400819	0	0	0	0	0	0	0
308.15	C16H23NO5	2633.56	251628	1	1.10585	1.25522	1.15427	1.67313	1.75425	0	0	0	0.855247	1.08669	1.08434	0.384645	0.581956	0	0	0	0.949384	1.02685
308.187	C17H27NO4	24.8871	254749	1	0	0	0	0.00989953	0.0165777	0	0	0	0	0	0	0	0	0	0	0	0	0
308.989	C12H6O10	91.7943	233073	1	0	0	0	0	0	0.114263	0.144416	0.204695	0	0	0	0.0942569	0.067259	0.386227	0.452148	0.550386	0	0
309.004	C16H6O7	505.274	248778	1	0	0	0	0	0	2.19367	2.37209	2.23383	2.24709	2.86796	1.89099	1.90991	1.86288	2.88649	2.84774	2.64988	0	0
309.008	C13H10O7S	327.637	242048	1	0	0	0	0	0	0.349722	0.303154	0.340911	1.03106	1.15023	1.51881	0.224067	0.283887	0.185422	0.17478	0.0837204	0	0
309.023	C17H10O4S	56.2613	221119	1	0	0	0	0	0	0.178744	0.218481	0.214895	0.858602	0.571367	0.741727	0.286555	0.298155	0	0.169273	0.150523	0	0
309.025	C13H10O9	3949.25	246313	1	0	0	0	0	0	18.3705	18.3601	18.3916	9.45497	10.4838	10.1244	10.0043	9.60386	29.4084	29.3599	29.0369	0	0
309.04	C17H10O6	3771.2	254081	1	0.0403507	0.061363	0.0407814	0	0	16.3056	17.1845	17.5625	25.4771	25.6647	27.2676	17.7244	18.548	16.0771	16.6047	14.925	0	0
309.044	C14H14O6S	884.452	235281	1	0.174253	0.200718	0.136976	0.0162826	0.00895348	0.677998	1.04244	0.672173	2.91791	2.92478	2.6396	1.04296	1.21656	0.835085	0.696717	0.502685	0	0
309.056	C21H10O3	94.8189	184732	1	0.0202511	0.0128574	0.0116864	0	0	0.281387	0.320429	0.275473	1.03914	1.42519	1.34779	0.564541	0.473295	0.226094	0.279354	0.195567	0	0
309.062	C14H14O8	13098.6	253916	1	4.69154	5.24293	4.75668	5.05958	5.29499	56.4946	58.4458	61.0003	42.7815	45.341	44.1073	44.1091	42.7862	75.5459	76.5737	76.6072	2.48455	2.43364
309.065	C11H18O8S	377.654	237272	1	0	0.0232779	0.0282883	0	0	0.183738	0.154696	0.151647	5.10585	5.67637	5.10471	0.557004	0.63127	0.156696	0.168691	0.292954	0.01401	0.0166247
309.073	C13H14N2O7	804.166	253654	1	0.31785	0.355132	0.306558	0.340074	0.261016	1.87056	1.72913	1.83197	10.1076	10.1638	11.0742	4.39379	4.93059	0.84758	0.698558	0.731294	0.320255	0.41671
309.077	C18H14O5	3379.52	257145	1	1.08704	1.21547	1.06249	0	0	15.3803	14.967	15.7384	25.6008	24.1075	24.3998	18.1373	19.9567	12.2988	11.7431	11.3609	0.249456	0.250105
309.088	C17H14N2O4	470.387	203824	1	0.0194989	0.0380301	0.0482048	0	0	0.399164	0.314757	0.353493	7.17857	6.26325	6.2244	1.24997	1.54813	0	0	0	0.0470242	0.0633483
309.098	C15H18O7	99100.6	256213	1	36.3914	41.1154	36.8901	63.3711	66.0124	76.2548	78.2887	81.6378	85.9635	91.2509	86.9747	87.388	91.2252	93.6147	95.8392	89.5618	18.9653	18.4278
309.101	C12H22O7S	263.509	224326	1	0	0	0	0	0	0	0	0	0.646655	0.582493	0.797834	0	0	0	0	0	0	0
309.109	C14H18N2O6	4825.38	252210	1	1.91274	2.15395	1.96699	3.05319	3.21426	0.511114	0.476199	0.668616	7.1835	7.19041	8.00595	4.00158	4.61657	0.352473	0.342684	0.492879	4.25477	4.34158
309.113	C19H18O4	1812.76	259134	1	2.31964	2.46752	2.32283	0	0	7.12471	7.08418	6.86636	11.197	11.9216	12.009	8.26031	9.43996	3.51327	2.70049	3.22084	0.729523	0.678883
309.134	C16H22O6	88028.8	255819	1	37.9353	40.9492	37.6004	56.5834	58.6373	33.7635	34.5158	35.5434	72.9179	74.259	72.4945	65.2786	73.1516	55.0978	54.8025	51.3202	20.2411	19.4991
309.146	C15H22N2O5	789.972	250320	1	0.298754	0.355561	0.305893	0.496864	0.526212	0	0	0	0.182558	0.225312	0.135359	0.135297	0.0906215	0	0	0	1.0513	1.04578
309.15	C20H22O3	1601.64	256597	1	2.01751	2.11385	2.00675	0.0198319	0.0209453	2.51599	2.194	2.67417	3.10891	4.10218	2.96267	2.73651	2.87869	0.616636	0.728553	0.667788	0.60646	0.513572
309.171	C17H26O5	7202.56	254178	1	6.55485	7.03162	6.52104	4.5687	4.79774	3.71063	3.76301	3.53478	17.3431	17.8725	15.8485	12.3704	13.123	8.5958	8.0046	7.98619	2.95654	2.95649
309.174	C14H30O5S	3997.28	254615	1	0.096094	0.117042	0.0851848	0.0157468	0.0214878	0	0	0	0.25435	0.299709	0.35058	1.6565	1.84087	0.817441	0.687262	0.594127	5.68925	5.50451
309.186	C21H26O2	512.035	248918	1	0.678858	0.67786	0.65611	0.00764208	0.0176104	0.222182	0.210799	0.23753	0.309785	0.394901	0.409955	0.4416	0.326223	0.109719	0.0717444	0	0.0665753	0.073746
309.207	C18H30O4	180.305	250511	1	0.0868785	0.0884784	0.0757284	0.0286298	0.0199248	0	0	0	0	0	0	0.147173	0.172727	0.125092	0.201209	0.166875	0	0
310.003	C12H9NO7S	35.7367	218808	1	0	0	0	0	0	0	0	0	0.545378	0.494365	0.399612	0.0929529	0.0854451	0	0	0	0	0
310.018	C16H9NO4S	31.9817	187247	1	0	0	0	0	0	0	0.0473128	0.0818084	0.314018	0.480705	0.251493	0	0	0	0	0	0	0
310.033	C20H9NOS	65.96	206970	1	0	0	0	0	0	0.266536	0.195749	0.295035	0	0	0	0.240058	0.231991	0.554115	0.446278	0.354382	0	0
310.036	C16H9NO6	695.277	248209	1	0	0	0	0	0	1.49301	1.43718	1.5782	9.17475	10.4505	9.22817	2.44244	2.8287	0.248038	0.287444	0.218415	0	0
310.039	C13H13NO6S	114.472	229328	1	0.0200636	0	0.0176742	0	0	0	0	0	0.820874	1.22701	0.863005	0	0	0	0	0	0	0
310.057	C13H13NO8	1078.45	255869	1	0.103194	0.15626	0.131333	0.216668	0.196715	5.20845	5.06297	4.89193	9.62146	8.91764	9.00691	4.55829	4.82146	2.60236	2.45903	2.15946	0.125299	0.140847
310.072	C17H13NO5	924.757	249317	1	0.0792914	0.139034	0.0941668	0	0	2.36263	2.61923	2.16035	12.8303	13.8997	13.0782	4.95564	5.27405	0.267914	0.334723	0.404627	0.0745144	0.061389
310.093	C14H17NO7	8873.02	254550	1	3.12481	3.37703	3.09379	5.68751	5.91045	4.13612	4.39143	4.26415	15.6439	16.8631	16.4347	11.8217	12.2093	3.09579	2.83729	2.73981	5.29549	5.20361
310.104	C13H17N3O6	163.976	209582	1	0	0	0	0.102829	0.109227	0	0	0	1.35852	1.05247	1.21384	0	0	0	0	0	0.0714782	0.0512433
310.108	C18H17NO4	629.169	249360	1	0.396638	0.424837	0.313935	0.0127442	0.0189154	0.42198	0.388811	0.506026	4.23132	3.67033	4.46463	1.30578	1.32415	0	0	0	0.161507	0.105485
310.12	C17H17N3O3	93.4741	161917	1	0	0	0	0	0	0	0	0	0.32865	0.338506	0	0	0	0	0	0	0	0
310.13	C15H21NO6	7538.73	252739	1	2.58403	2.84753	2.70434	4.81178	5.02166	0.202339	0.234282	0.128813	4.85472	5.08889	4.51476	3.62037	4.07244	0.228518	0.204425	0.192478	4.12888	3.97963
310.141	C14H21N3O5	169.646	233226	1	0.0421777	0.0362921	0.0274654	0.0968363	0.113004	0	0	0	0	0	0	0	0	0	0	0	0.0590857	0.0601511
310.145	C19H21NO3	333.43	245116	1	0.122668	0.135913	0.152982	0.0166342	0.0127151	0	0	0	0.289652	0.387196	0.430447	0.0831223	0.126888	0	0	0	0.0402171	0.0287152
310.166	C16H25NO5	594.803	247041	1	0.107462	0.116217	0.0941249	0.369346	0.396208	0	0	0	0	0	0	0	0	0	0	0	0.0620905	0.0366492
310.987	C12H8O8S	66.7981	239087	1	0	0	0	0	0	0.139623	0.0645477	0.115742	0.560231	0.478808	0.326502	0.0664804	0.0773072	0	0	0	0	0
311.005	C12H8O10	752.174	224599	1	0	0	0	0	0	1.10592	1.3808	1.26361	0.48504	0.378821	0.344412	0.225842	0.228664	3.34249	3.62912	3.41411	0	0
311.017	C20H8O2S	50.1046	171259	1	0	0	0	0	0	0.0510173	0	0.0609299	0.154676	0.150123	0	0.380014	0.266105	0	0	0	0	0
311.02	C16H8O7	2488.03	253967	1	0	0	0	0	0	11.0479	11.3565	11.5868	15.2307	15.3266	15.7167	10.7326	10.8349	12.9769	12.5399	12.7422	0	0
311.023	C13H12O7S	954.626	240292	1	0.0220221	0.0121181	0.0343149	0	0	0.61135	0.788378	0.627256	2.25477	2.01276	2.347	0.575615	0.688008	0.293274	0.493496	0.216017	0	0
311.041	C13H12O9	9431.56	250453	1	0.202045	0.288302	0.249011	0.229005	0.232651	41.108	42.3447	43.9227	18.014	18.8177	18.1099	16.3812	15.2769	45.7968	46.2916	46.9183	0.0351894	0.0639729
311.052	C12H12N2O8	186.706	235282	1	0	0	0	0	0	0.757097	0.773974	0.869488	1.6432	1.92415	1.69903	0.835665	0.729882	0.313936	0.37583	0.360718	0	0
311.056	C17H12O6	4931.31	252886	1	0.528322	0.585153	0.544628	0.00693623	0.0145882	22.3045	22.5418	22.9651	33.4832	34.9433	33.2698	26.6688	26.3394	21.9051	21.8113	21.8206	0.110848	0.102862
311.06	C14H16O6S	2008.69	231829	1	0.651815	0.659546	0.553335	0.148763	0.180362	0.820982	0.716239	0.765697	5.05165	4.80864	5.16762	1.52169	1.19715	0.377478	0.527139	0.333055	0.168134	0.166064
311.071	C21H12O3	308.011	219828	1	0.0245957	0	0.0125104	0	0	1.14947	1.44601	1.30254	2.96536	2.9378	2.98038	1.33395	1.62703	0.322745	0.390257	0.278946	0.0370226	0.0390231
311.077	C14H16O8	46570.8	253880	1	14.3591	16.6099	14.7649	28.4777	31.0215	82.6374	86.6048	89.4006	58.0443	61.3616	58.8294	62.7854	61.4243	83.5728	82.7916	84.1397	7.81001	7.57527
311.088	C13H16N2O7	1375.98	250370	1	0.513485	0.587195	0.571939	0.89506	0.897909	0.928637	1.11961	1.23409	6.62853	7.62858	6.792	3.22728	3.21505	0.574038	0.561791	0.548681	0.957554	0.966086
311.093	C18H16O5	3173.31	254947	1	2.59545	2.94685	2.62899	0.0261968	0.0218089	14.3405	14.5148	14.7781	24.144	24.5744	24.6686	19.4901	19.1545	11.2676	11.113	10.6605	1.15042	1.15015
311.108	C22H16O2	58.2934	233033	1	0	0	0	0	0	0.18605	0.273668	0.177293	0.381319	0.528726	0.641724	0.264678	0.141622	0	0	0	0	0
311.114	C15H20O7	140700	255537	1	41.5078	47.2371	42.0753	87.1332	93.7221	73.2283	76.8744	78.3658	90.9678	97.3987	94.3006	100	99.0712	96.7959	100	100	23.4334	22.9436
311.125	C14H20N2O6	2238.91	247114	1	0.690657	0.812682	0.626454	1.39857	1.49137	0	0.106974	0.062243	1.25361	1.27461	1.36444	0.637826	0.956623	0.0933181	0	0.10273	2.36737	2.279
311.129	C19H20O4	3381.9	255297	1	4.26246	4.49097	4.33349	0.096234	0.0937979	7.04966	7.42526	7.64645	12.7835	13.1948	12.7258	10.3646	10.775	4.57424	4.02594	4.22169	2.0398	1.98703
311.15	C16H24O6	36568.7	251984	1	14.1704	15.2136	13.9531	23.7876	23.473	12.0558	12.3863	11.9478	35.418	37.7167	36.9169	35.6368	36.0007	31.0273	29.8661	30.7455	8.3016	8.28622
311.161	C15H24N2O5	81.3662	239626	1	0.0238084	0	0.0172472	0.052928	0.0498227	0	0	0	0	0	0	0	0	0	0	0	0.0154736	0.0117343
311.165	C20H24O3	2040.9	268701	1	2.59764	2.76301	2.46822	0.318295	0.351822	2.60767	2.74442	2.3754	4.18556	4.23712	4.36273	3.93582	4.20335	1.414	1.64954	1.21561	0.97025	0.965909
311.186	C17H28O5	1374.9	250099	1	0.736475	0.846985	0.702678	0.894357	0.900973	0.0470501	0.0578046	0	0.791681	0.989946	1.11446	0.892109	1.1632	0.809157	0.82771	0.873763	0.118263	0.1424
311.202	C21H28O2	437.804	245223	1	0.50767	0.610687	0.476774	0.0166863	0.0173161	0.125676	0.0989476	0.195362	0.154371	0.412004	0.223418	0.204261	0.173338	0	0	0	0.0317417	0.0360252
311.223	C18H32O4	111.499	252207	1	0	0	0	0	0	0	0	0	0	0	0	0.0826919	0.0875093	0	0	0	0	0
311.991	C11H8NO8P	28.8397	211522	1	0	0	0	0	0	0.143127	0.130033	0.0907649	0.275513	0.33474	0.236532	0.134004	0.144194	0.158385	0.169909	0.124525	0	0
312.015	C15H7NO7	139.041	233067	1	0	0	0	0	0	0.226514	0.34958	0.285224	1.78939	2.08987	1.98435	0.278601	0.333033	0	0	0	0	0
312.018	C12H11NO7S	64.8228	202235	1	0	0	0	0	0	0	0	0	0.989259	0.771444	0.706012	0.178485	0.163829	0	0	0	0	0
312.036	C12H11NO9	146.724	215172	1	0	0	0	0	0	0.512002	0.551406	0.567992	0.617367	0.686834	0.556805	0.427958	0.409465	0.302542	0.21861	0.253445	0	0
312.051	C16H11NO6	1127.97	250697	1	0.0348596	0.0435001	0.0335195	0	0	3.08165	3.24236	2.98741	16.5876	16.134	16.5256	5.9675	6.12643	0.78166	0.795693	0.790026	0.0350185	0.0417229
312.055	C13H15NO6S	159.5	222167	1	0.0372772	0.0521944	0.0389954	0.0239827	0.0159642	0	0	0	0.695824	0.657105	0.741621	0	0	0	0	0	0.038787	0.03193
312.063	C15H11N3O5	159.429	171074	1	0	0	0	0	0	0	0	0	0	0	0	0	0	0	0	0	0.0303472	0.0174591
312.067	C20H11NO3	124.969	205958	1	0.014006	0.0125844	0.0124435	0	0	0.224721	0.171961	0.207729	1.90715	1.36353	1.40663	0.258895	0.533679	0.069793	0	0.0822397	0	0
312.073	C13H15NO8	1881.78	256715	1	0.605866	0.671675	0.520289	1.20134	1.25348	4.68211	4.63233	5.09801	9.78096	9.41134	9.47475	5.32202	5.73971	2.75316	2.62757	2.49953	0.880204	0.651451
312.088	C17H15NO5	1067.62	251853	1	0.623496	0.646865	0.573161	0.0463343	0.0667143	1.69159	1.88591	1.95888	12.4024	12.7414	12.146	5.72103	5.69626	0.290797	0.197536	0.225147	0.251272	0.265478
312.099	C16H15N3O4	4795.89	192694	1	1.01484	1.14423	1.0692	0	0	0	0	0	1.44922	1.87667	1.34322	0	0	0	0	0	0	0
312.109	C14H19NO7	7318.38	254771	1	2.36176	2.53633	2.49869	4.66241	4.87488	0.927886	1.00132	1.1591	6.6751	6.53615	7.27774	5.95598	6.28569	0.884735	0.69134	0.665861	4.57868	4.5101
312.12	C13H19N3O6	83.5114	234780	1	0.0279782	0.026749	0.0285656	0.0543234	0.0371874	0	0	0	0.221393	0.352357	0.373568	0	0	0	0	0	0.0326293	0.0294264
312.124	C18H19NO4	1070.72	249708	1	0.724052	0.822107	0.690957	0.100622	0.12027	0.204982	0.17404	0.172823	3.28712	2.85283	2.6865	0.926474	1.17671	0	0	0	0.296498	0.356125
312.145	C15H23NO6	2500.17	250829	1	0.537701	0.636045	0.587125	1.62634	1.63067	0	0	0	0.715255	0.525984	0.487608	0.464354	0.264363	0	0	0	0.589874	0.563269
312.161	C19H23NO3	313.979	248247	1	0.126227	0.144091	0.129882	0.0220869	0.0290724	0	0	0	0.239734	0.133414	0.233326	0	0	0	0	0	0.0294201	0.045928
312.999	C15H6O8	514.922	246922	1	0	0	0	0	0	2.2827	2.37955	2.39799	1.61153	1.75825	1.58806	1.21699	1.54807	2.9608	3.61269	3.00401	0	0
313.002	C12H10O8S	656.346	236464	1	0	0	0	0	0	0.337401	0.301163	0.413219	1.08906	1.07221	0.973257	0.263645	0.259372	0.0809724	0.0956727	0.0889631	0	0
313.02	C12H10O10	1804.79	226358	1	0	0	0	0	0	7.67096	7.97381	8.4049	1.10945	1.20157	0.845575	0.632788	0.535023	7.50977	7.24844	6.98102	0	0
313.033	C20H10O2S	28.3959	100144	1	0	0	0	0	0	0	0.0692057	0.0411859	0.227558	0.176974	0	0.215367	0.180099	0	0	0	0	0
313.035	C16H10O7	4791.45	250432	1	0.0859158	0.112156	0.0924928	0	0	21.2622	22.2853	22.3138	28.9356	30.4465	30.0338	20.9575	21.6077	26.5849	26.0886	26.5492	0	0
313.039	C13H14O7S	2881.77	245237	1	0.165063	0.182839	0.186867	0.0414094	0.0467236	0.845011	0.922109	0.961523	3.791	4.39176	3.99666	1.12376	1.11958	0.414394	0.543433	0.427493	0.0775903	0.112295
313.051	C20H10O4	569.24	230733	1	0	0.0152498	0.0144464	0	0	2.29027	2.67239	2.18906	4.02987	3.64508	3.92716	2.7416	2.76886	0.840456	1.25332	0.733975	0	0
313.057	C13H14O9	14029.7	252302	1	1.82037	2.11856	1.91284	3.09523	3.19182	61.1004	61.8145	65.3363	27.5582	28.2982	29.2764	21.4012	21.8284	55.7205	56.3688	54.1185	0.745001	0.823618
313.062	C19H10N2O3	44.0112	144073	1	0	0	0	0	0	0.142974	0	0.132557	0.604109	0.661516	0.579895	0	0	0	0	0	0	0
313.072	C17H14O6	5165.88	251704	1	2.10025	2.26319	2.17594	0.117298	0.134015	24.3705	24.252	23.9043	35.8373	37.4037	36.1083	31.2833	31.3227	25.9624	25.6621	25.1209	0.83672	0.913612
313.075	C14H18O6S	5591.65	240091	1	1.31107	1.52612	1.37021	0.611812	0.635832	0.965108	0.921173	0.915166	7.39641	8.36389	8.49024	1.91042	1.94608	0.498144	0.425366	0.425497	0.433426	0.373247
313.079	C11H22O6S2	14.8736	139560	1	0	0	0	0	0	0.0441256	0.0449968	0.0420868	0.131819	0.158275	0.190504	0	0	0	0	0	0	0
313.083	C16H14N2O5	1053.01	225917	1	0.179329	0.234289	0.225769	0	0	0.653438	0.719459	0.751408	12.7503	12.4439	13.5327	3.78566	3.98424	0	0.320875	0.33395	0.244442	0.270876
313.087	C21H14O3	451.097	231341	1	0.0366256	0.0368194	0.0330858	0	0	1.93845	2.11775	2.0204	2.88378	2.76368	3.06392	1.81867	1.88401	0.394586	0.470316	0.459838	0.0269354	0.0254689
313.093	C14H18O8	69279.4	252931	1	18.6645	21.5686	19.112	41.9223	46.148	76.1175	79.2168	84.1062	65.808	71.7059	67.6802	67.6336	68.1715	86.5636	91.5883	84.5885	11.1271	10.9477
313.104	C13H18N2O7	553.774	245346	1	0.222624	0.179497	0.199913	0.357056	0.368877	0.133779	0.156307	0.28647	2.00718	1.73721	1.86407	0.695961	0.713533	0.0944392	0.145861	0.0702336	0.335687	0.31328
313.108	C18H18O5	4869.23	251277	1	6.50072	6.48935	6.23932	1.20431	1.32674	14.146	14.5238	14.5505	25.3092	25.0211	25.0865	20.1265	21.8508	12.8739	11.319	11.7023	3.27059	3.23171
313.112	C15H22O5S	25157.4	247446	1	1.69255	1.82356	1.5435	0.760909	0.705511	0.568557	0.544895	0.592383	3.78428	3.22839	3.9936	4.05889	4.18742	0.596815	0.749515	0.435941	0.303593	0.319644
313.123	C22H18O2	35.2447	234575	1	0.026388	0.0323939	0.0339794	0	0	0.113384	0.128829	0.113799	0.306665	0.226188	0.406283	0.157012	0.0930378	0	0	0	0	0
313.129	C15H22O7	62533.3	252191	1	17.6075	19.3996	17.7236	40.6773	41.3232	27.3751	27.6655	27.6714	49.9175	51.5117	51.0415	54.0847	53.1835	55.6815	54.4166	55.5434	12.2817	11.9077
313.14	C14H22N2O6	160.479	233951	1	0.0606739	0.0668239	0.0468915	0.10439	0.0879791	0	0	0	0	0	0	0	0	0	0	0	0.128917	0.13429
313.145	C19H22O4	5780.97	252564	1	7.07014	8.06378	7.10455	1.57826	1.58798	8.09334	7.94447	8.36541	17.2148	15.8217	15.0893	12.844	13.6909	7.05069	6.3212	5.81763	3.43473	3.34715
313.148	C16H26O4S	883.004	239665	1	0.064782	0.0875858	0.0701602	0	0	0	0	0	0	0	0	0	0	0	0	0	0	0
313.166	C16H26O6	5141.85	249916	1	1.91677	2.08162	1.94007	3.31221	3.42506	0.537843	0.421593	0.35628	3.93531	4.11148	4.53688	6.26669	6.60129	5.40042	5.67001	5.87226	1.29372	1.28441
313.181	C20H26O3	2140.8	252237	1	2.67096	2.98207	2.74317	0.377242	0.380661	2.07628	1.85847	1.7807	3.88628	3.43595	4.27855	3.81109	4.10931	1.31403	1.2269	1.17178	0.928222	0.874857
314.013	C15H9NO5S	46.2606	188582	1	0	0	0	0	0	0	0	0	0.570849	0.695325	0.456037	0.149917	0.141814	0	0	0	0	0
314.031	C15H9NO7	676.849	242067	1	0	0	0	0	0	1.65774	1.71773	1.90438	10.3294	9.31621	9.09046	2.55115	2.33091	0.532178	0.398922	0.419202	0	0
314.034	C12H13NO7S	75.6862	193868	1	0	0	0	0	0	0	0	0	0.895596	0.761202	0.707993	0.145642	0.299985	0	0	0	0	0
314.046	C19H9NO4	115.385	178856	1	0	0	0	0	0	0.133503	0.281991	0.164849	1.50763	1.7343	1.37737	0.311594	0.235846	0	0	0	0	0
314.049	C16H13NO4S	52.6504	180533	1	0	0	0	0	0	0.112686	0.0981413	0.143619	0.473377	0.665679	0.771368	0	0	0	0	0	0	0
314.052	C12H13NO9	221.239	218701	1	0	0	0	0	0	0.848626	0.993694	1.01994	1.07148	0.971811	0.995273	0.337681	0.236715	0.415076	0.452469	0.277323	0	0
314.067	C16H13NO6	1319.52	252350	1	0.310803	0.344754	0.372507	0.0440929	0.0393816	4.14809	4.1864	4.19463	18.7469	19.2171	19.3319	8.73086	8.87682	1.12877	1.20429	1.18046	0.196823	0.161704
314.07	C13H17NO6S	147.907	202380	1	0.0500902	0.0391571	0.0591265	0.0743932	0.0592214	0	0	0	0.530695	1.00164	0.893503	0.180577	0.140726	0	0	0	0.0854199	0.105619
314.078	C15H13N3O5	735.18	198452	1	0.117099	0	0.153958	0.0526244	0.0238431	0	0	0	3.01719	3.02761	3.3333	0	0	0	0	0	0.0380854	0.0310422
314.082	C20H13NO3	123.675	205191	1	0.0161554	0	0.0133403	0	0	0.313076	0.212597	0.234017	1.8874	1.76799	1.49881	0.349187	0.495138	0	0	0	0	0
314.088	C13H17NO8	1863.11	253567	1	0.401942	0.376851	0.366671	1.21194	1.20948	1.28471	1.37336	1.34087	3.75279	4.31517	4.29106	3.0332	3.07632	0.820258	0.824747	0.698891	0.630031	0.629266
314.103	C17H17NO5	1617.96	252837	1	1.28478	1.51796	1.40573	0.418324	0.376016	1.17112	1.20881	1.37528	10.3697	10.7964	10.8274	5.18373	5.4194	0.287976	0.291436	0.179278	0.939311	0.865237
314.115	C16H17N3O4	3721.32	221939	1	0	0	0	0.0581655	0.0591106	0	0	0	1.64883	1.06671	1.12219	0	0	0	0	0	0.094276	0.0713867
314.125	C14H21NO7	2360.54	249579	1	0.457641	0.457081	0.431896	1.53551	1.52539	0	0	0	0.803324	0.813432	0.728251	0.680955	0.55794	0	0.0771363	0.0656152	0.996616	0.982921
314.136	C13H21N3O6	19.9035	214462	1	0	0	0	0.0121606	0.013258	0	0	0	0	0	0	0	0	0	0	0	0	0
314.14	C18H21NO4	1370.11	249747	1	0.943585	1.10282	0.944528	0.274109	0.312289	0.0695476	0.0646151	0.0747033	1.6426	1.79579	1.64806	0.626033	0.568101	0	0	0	0.539611	0.506885
314.161	C15H25NO6	93.4714	234688	1	0	0	0	0.0554163	0.0622627	0	0	0	0	0	0	0	0	0	0	0	0	0
314.176	C19H25NO3	209.578	246870	1	0.0965341	0.100091	0.0890631	0.00773909	0.0232743	0	0	0	0.239449	0.159788	0	0	0	0	0	0	0	0
315.012	C19H8O3S	31.0011	197158	1	0	0	0	0	0	0.0688163	0.0566304	0.041831	0.181455	0.286399	0.307652	0.190334	0.229783	0	0	0	0	0
315.015	C15H8O8	2307.85	248767	1	0	0	0	0	0	10.3837	10.8346	10.5232	12.6383	13.7272	12.7993	7.44439	7.74641	15.9611	15.3292	15.2431	0	0
315.018	C12H12O8S	984.663	238932	1	0	0	0	0	0	0.643751	0.618353	0.524521	1.54411	1.81514	1.36084	0.353168	0.43067	0.232637	0.315739	0.340026	0	0
315.03	C19H8O5	317.347	235695	1	0	0	0	0	0	1.26797	1.31805	1.47788	2.48463	2.3973	3.12294	2.13092	1.97439	0.923315	0.839554	0.849125	0	0
315.033	C16H12O5S	212.987	228753	1	0	0	0	0	0	0.859173	0.999903	0.97225	1.25656	2.14509	1.6112	0.760717	0.567765	0.51909	0.830525	0.593615	0	0
315.036	C12H12O10	4353.12	244786	1	0	0	0	0	0	18.8968	19.5591	20.2725	3.68651	4.347	4.43939	1.13156	1.00925	13.89	13.3228	13.0533	0	0
315.049	C20H12O2S	27.2369	153225	1	0	0	0	0.0157158	0.00883133	0	0	0	0.241335	0.172277	0	0.198221	0.201882	0	0	0	0	0
315.051	C16H12O7	6754.17	252134	1	0.84256	0.992122	0.87292	0.0390806	0.0451657	29.1957	30.0536	31.4541	40.2229	42.0537	42.1178	31.3356	32.9347	39.1291	39.4663	37.6985	0.181976	0.188939
315.054	C13H16O7S	7437.41	249136	1	0.572449	0.5298	0.484968	0.529589	0.514439	1.42117	1.39992	1.34356	5.61063	5.92089	6.90919	2.26235	2.47821	0.609794	0.47709	0.462393	0.396486	0.345547
315.062	C15H12N2O6	1074.49	237057	1	0.111392	0.11284	0.0751389	0.056772	0.0746332	1.20913	1.32076	1.23565	15.0904	16.1503	15.2218	3.70056	4.3014	0	0.991338	0.69164	0.151835	0.139607
315.066	C20H12O4	1263.45	241637	1	0.0233483	0.0349722	0.040381	0	0	5.90561	5.53176	5.88386	7.59426	8.83193	9.62635	5.65913	6.34959	2.80941	2.20873	2.28535	0.0147029	0.0146557
315.072	C13H16O9	9943.11	250587	1	2.39155	2.60848	2.56708	5.61536	5.53163	43.8726	46.1601	46.305	26.7472	28.7103	27.865	21.782	21.3474	44.5514	45.41	44.9441	1.68313	1.567
315.078	C19H12N2O3	97.2742	153686	1	0	0	0	0	0	0	0.100295	0.126484	1.4845	1.32709	1.19057	0.106959	0.147917	0	0	0	0	0
315.087	C17H16O6	5488.24	249238	1	5.82139	6.60064	5.99612	1.64398	1.64041	24.9188	25.7654	24.7825	38.4054	39.5135	38.9427	36.1071	36.1071	26.8533	26.1776	25.7488	3.09036	2.91472
315.091	C14H20O6S	7096.54	251459	1	1.36614	1.55702	1.41903	0.967525	0.981382	1.04857	1.02196	0.978467	7.5725	7.93006	8.11393	2.39038	2.59539	1.0294	0.902688	0.934692	1.02382	0.94751
315.099	C16H16N2O5	1526.76	225239	1	0.860527	0.916963	0.875942	0	0	0.708253	0.652639	0.586967	14.8821	13.5629	14.6907	4.53961	5.17532	0.203839	0.158827	0.135947	1.07101	1.06251
315.103	C21H16O3	454.937	242787	1	0.0723987	0.103044	0.0819977	0	0	2.01303	1.66979	2.11864	2.33107	2.43078	1.98067	1.63303	1.54695	0.390053	0.623473	0.413071	0	0
315.109	C14H20O8	26795.9	250836	1	7.79949	8.32331	8.09924	17.2218	17.8491	26.8768	27.1439	27.6265	33.4823	34.7515	35.1309	35.0776	36.9689	41.3256	38.8937	39.2762	6.666	6.79926
315.12	C13H20N2O7	76.5295	216806	1	0.0353748	0.0415813	0.0532903	0.0475007	0.0358101	0.0422286	0.0484003	0	0.210103	0.206798	0.329028	0.0829127	0.194425	0	0	0	0.0340553	0.0292191
315.124	C18H20O5	10274.1	250566	1	13.3711	13.9372	13.165	3.81197	4.04579	16.6826	16.4634	17.0068	30.7501	30.8988	30.8282	24.9378	27.248	15.8454	14.542	14.869	6.3582	6.50538
315.127	C15H24O5S	4253.01	250503	1	0.609465	0.688569	0.532934	0.116067	0.151106	0.414086	0.401531	0.346243	3.05686	3.5624	2.87661	0.997225	0.906262	0.981972	0.952919	0.868692	0.0533145	0.0667065
315.135	C17H20N2O4	850.825	234251	1	0.320698	0.395986	0.332137	0	0	0.0560691	0.0642016	0.0443118	2.44906	2.60626	2.23187	0.65242	0.620809	0	0	0	0.764894	0.763562
315.139	C22H20O2	39.5441	236573	1	0.0371241	0.0292265	0.038783	0	0	0.0527756	0	0.0666073	0	0	0	0	0	0	0	0	0	0
315.145	C15H24O7	9097.37	253162	1	2.67371	3.00752	2.65731	5.65638	6.0599	2.31389	2.46741	2.66865	11.0497	10.7034	10.8642	11.3277	11.7396	12.5442	12.5477	12.0754	2.59246	2.4159
315.16	C19H24O4	7483.44	251066	1	9.21679	10.4385	8.86857	2.27623	2.3973	7.63272	7.51831	7.79809	18.3348	17.438	18.0144	14.6953	15.1584	8.86004	7.95515	7.85879	4.06451	3.88084
315.181	C16H28O6	160.604	246800	1	0.0132275	0.0223988	0.017582	0.0723229	0.0748773	0	0	0	0	0	0	0.329671	0.455929	0.141705	0.153439	0.269743	0	0
315.197	C20H28O3	1431.74	249533	1	1.86374	1.99711	1.73218	0.157079	0.173791	0.868176	0.573292	0.678109	2.47407	2.48342	2.66588	2.03889	2.2913	1.15121	0.940596	0.836289	0.385962	0.360174
316.01	C14H7NO8	83.8352	230062	1	0	0	0	0	0	0.236744	0.209243	0.250091	1.27941	0.994721	1.21241	0.210519	0.225328	0	0	0	0	0
316.025	C18H7NO5	40.9963	150774	1	0	0	0	0	0	0.0735328	0.103933	0.0828217	0.433117	0.466269	0.600627	0.143701	0.131707	0	0	0	0	0
316.029	C15H11NO5S	66.5644	197618	1	0	0	0	0	0	0	0	0	0.71599	1.0005	0.743764	0.232103	0.294855	0	0	0	0	0
316.046	C15H11NO7	1181.28	249858	1	0.0522168	0.0246892	0.0404326	0	0	4.27534	4.60988	4.42487	16.1276	17.7553	16.5596	5.6886	6.00849	1.64763	1.54014	1.67067	0.0250473	0.0437393
316.058	C14H11N3O6	934.826	206920	1	0.0245192	0.0442404	0	0.0106551	0.0142374	0	0	0	0	2.99201	2.66965	0	0	0	0	0	0.0166071	0.0202371
316.062	C19H11NO4	320.173	204241	1	0	0	0	0	0	0.481609	0.634945	0.544049	4.88615	3.9208	3.96319	0.910649	0.953442	0	0.0887829	0.0704984	0	0
316.067	C12H15NO9	76.3517	193630	1	0	0	0	0.00754042	0.00920322	0.273379	0.320098	0.355569	0.538555	0.456665	0.671694	0	0	0.144076	0.142147	0.123527	0	0
316.083	C16H15NO6	1749.33	252670	1	1.21761	1.41354	1.32528	0.645874	0.658607	4.00366	4.04907	4.26776	18.6407	20.0296	19.9798	10.4972	10.7728	1.6371	1.71641	1.33485	1.09439	1.14987
316.086	C13H19NO6S	107.521	179801	1	0	0	0	0.0598603	0.0716215	0	0	0	0.456919	0.295065	0.38166	0.183249	0.151104	0	0	0	0.106865	0.106261
316.094	C15H15N3O5	1102.79	235050	1	0.237269	0.212119	0	0.17682	0.168025	0	0	0	4.02536	4.31946	4.55149	0	0	0	0	0	0.134723	0.149678
316.098	C20H15NO3	109.677	208632	1	0	0	0	0	0	0.181288	0.12261	0.137236	1.30336	1.31366	1.48568	0.372209	0.261447	0	0	0	0	0
316.104	C13H19NO8	438.524	201706	1	0.0252168	0.0234746	0.048707	0.281148	0.292108	0	0.0571755	0.0488387	0.467848	0.809057	0.778493	0.275116	0.313697	0.0822851	0.0930016	0.0996173	0.0861058	0.0762919
316.119	C17H19NO5	2507.14	249581	1	2.19401	2.42217	2.16253	1.17203	1.17484	0.694593	0.650662	0.751329	8.90204	8.54282	9.12869	4.21699	4.37116	0.155646	0.119497	0.202535	1.91835	1.88259
316.13	C16H19N3O4	502.496	214679	1	0	0	0	0.0632023	0.0596765	0	0	0	0.626351	0.548548	0.518106	0	0	0	0	0	0.163953	0.167494
316.14	C14H23NO7	71.3232	183003	1	0	0	0	0.0463951	0.0261745	0	0	0	0	0	0	0	0	0	0	0	0	0
316.155	C18H23NO4	1154.43	247204	1	0.778214	0.84417	0.737831	0.336138	0.387057	0.0506784	0	0.075946	1.22026	1.2176	1.16741	0.233589	0.33325	0	0	0	0.362619	0.306704
316.192	C19H27NO3	36.9579	250732	1	0.0147819	0.0158971	0.0292496	0	0	0	0	0	0	0	0	0	0	0	0	0	0	0
316.994	C14H6O9	286.913	237510	1	0	0	0	0	0	1.21485	1.34696	1.20091	0.940303	0.792028	0.553169	0.300039	0.303973	2.00202	1.90211	1.8152	0	0
316.997	C11H10O9S	88.1114	228239	1	0	0	0	0	0	0.129729	0.128071	0.134432	0.214999	0.392843	0.135552	0.11155	0.0660983	0.0744296	0.140656	0.169019	0	0
317.007	C11H11O9P	28.4047	190834	1	0	0	0	0	0	0.0766609	0.125855	0.104021	0	0	0	0.215433	0.144053	0	0	0	0	0
317.009	C18H6O6	65.885	218594	1	0	0	0	0	0	0.272995	0.191712	0.306826	0.398915	0.64391	0.669515	0.34313	0.456177	0.31511	0.231296	0.370305	0	0
317.012	C15H10O6S	183.998	220458	1	0	0	0	0	0	0.257502	0.251828	0.3924	1.23064	1.10763	1.34157	0.165964	0.242243	0.184795	0.220029	0.13943	0	0
317.028	C19H10O3S	46.7969	180005	1	0	0	0	0	0	0	0.0650736	0.0523568	0.359926	0.5801	0.360561	0.282099	0.346862	0	0	0	0	0
317.03	C15H10O8	4894.86	248499	1	0.0457306	0.0610975	0.072589	0	0	22.0044	21.8166	22.7953	27.7876	26.4488	27.3617	16.9756	18.23	35.5029	34.5743	33.2674	0	0
317.034	C12H14O8S	996.488	242226	1	0.0181876	0.0297868	0.0215555	0.0190652	0.0320575	1.2759	1.04269	1.06147	2.69705	2.63114	2.56597	0.847534	0.81909	0.375949	0.387473	0.422801	0	0
317.043	C12H15O8P	48.5425	114796	1	0	0	0	0	0	0	0.187516	0.171529	0	0	0	0.368166	0.301474	0.315568	0.245888	0.256427	0	0
317.046	C19H10O5	1677.81	248040	1	0	0.0135721	0.0107844	0	0	7.11687	7.53416	7.81356	11.7594	12.0034	11.6554	8.64633	8.6195	5.01856	4.72619	4.41178	0	0
317.049	C16H14O5S	284.914	222536	1	0.0338879	0.0353546	0.0326482	0	0	1.00149	1.21788	1.32684	1.67541	2.09335	2.17728	1.07981	1.21821	1.0487	1.10808	1.01187	0	0
317.052	C12H14O10	2937.51	234360	1	0	0	0	0.0201303	0.0184825	12.7881	13.1585	13.68	3.43406	3.30696	3.71386	1.38475	1.30199	12.9303	12.5723	11.6323	0.0291033	0.0157007
317.064	C20H14O2S	380.228	138620	1	0	0	0	0.19127	0.253276	0	0	0	0.192535	0.164048	0.183465	0	0	0	0	0	0	0
317.067	C16H14O7	8068.28	251130	1	3.33105	3.74514	3.48271	1.07234	1.07227	36.42	37.6465	37.574	45.4016	48.9516	47.7013	44.3126	44.4358	47.4987	47.1979	46.2503	1.67904	1.66397
317.07	C13H18O7S	1916.31	248589	1	0.841982	0.928057	0.74534	1.07824	1.1484	1.88448	1.90847	1.85461	6.74583	7.96481	7.47801	2.97836	2.57403	0.75666	0.502527	0.891593	1.27303	1.16062
317.078	C15H14N2O6	1603.23	247294	1	0.729799	0.849852	0.778591	0.17799	0.253949	1.65213	1.66292	1.61664	20.0283	20.6435	20.3037	6.77378	7.185	0.531664	0.678133	0.623311	0.746061	0.809455
317.082	C20H14O4	1505.42	238912	1	0.147925	0.143165	0.125138	0	0	6.92985	6.69881	7.01071	9.57603	9.36004	9.61736	7.0587	7.16397	3.90899	3.39821	3.03419	0.0300436	0.0161479
317.088	C13H18O9	3562.91	246553	1	0.531021	0.641695	0.560053	1.90993	1.93414	11.193	11.6425	11.6601	8.91922	10.6393	9.9633	9.99956	9.0175	16.5383	16.8794	15.8012	0.745071	0.689128
317.093	C19H14N2O3	87.2202	163851	1	0	0	0	0	0	0.0958765	0.0728235	0	1.17314	0.841113	1.27784	0.138098	0.193978	0	0	0	0	0
317.103	C17H18O6	13059.1	250531	1	16.6018	17.6248	16.7336	7.34798	7.98104	26.9685	26.6432	28.2847	45.9548	46.3812	47.0555	40.5141	43.8094	29.6988	27.5048	27.428	8.10131	8.05152
317.106	C14H22O6S	1465.66	258710	1	0.810075	0.878561	0.843071	0.419238	0.397917	0.562618	0.433955	0.57938	4.73926	4.42675	4.17055	1.66435	1.46254	0.887297	0.863219	0.639155	0.516289	0.43684
317.114	C16H18N2O5	2158.63	246537	1	1.62326	1.67771	1.64587	0.8983	0.956391	0.786414	0.653693	0.534681	12.3946	12.2404	11.6454	5.31456	6.0204	0.293898	0.250675	0.368726	2.6063	2.55949
317.118	C21H18O3	271.803	242505	1	0.154517	0.197782	0.155995	0	0	1.13382	1.15792	1.26579	1.63878	1.50131	1.37305	1.11713	1.37164	0.264235	0.207293	0.145187	0	0
317.124	C14H22O8	3475.98	251948	1	0.830207	0.802973	0.809117	2.23089	2.3154	1.82913	2.13993	2.13255	4.41714	4.64976	4.57793	6.48121	6.63663	7.95545	7.86852	7.93752	1.17046	1.17295
317.139	C18H22O5	16811.7	248629	1	20.9358	23.4503	21.0091	9.05985	9.10337	18.5207	18.7392	18.4519	35.7287	37.1464	37.6698	30.0316	31.3423	19.7289	19.2514	19.0262	9.7002	9.25549
317.143	C15H26O5S	1185.77	244746	1	0.126288	0.151573	0.142251	0.0069006	0.00996261	0	0	0	0.454591	0.705865	0.411554	0.349495	0.338244	0.449507	0.451301	0.351125	0	0
317.151	C17H22N2O4	573.586	245002	1	0.295551	0.262533	0.263288	0.213096	0.218442	0	0	0	0.308574	0.430758	0.471109	0.181715	0.0992898	0	0	0	0.524731	0.48745
317.161	C15H26O7	553.472	234804	1	0.0342446	0.0226348	0.0256299	0.360028	0.365915	0	0	0	0	0	0	0.213642	0.179048	0.215522	0.272018	0.201662	0.031399	0.0239905
317.176	C19H26O4	6101.57	248758	1	7.96649	8.51099	7.77321	2.12817	2.30734	5.28816	5.08585	5.13879	16.8839	16.4448	16.5701	11.6266	12.5179	7.29077	6.55498	6.41631	3.52794	3.23673
317.212	C20H30O3	405.085	245560	1	0.563798	0.547158	0.517475	0.0101476	0.0136123	0.110819	0.0683598	0.0915547	0.475411	0.619327	0.803489	0.391034	0.531715	0.182846	0.185346	0.132834	0.059928	0.0664269
318.008	C14H9NO6S	184.099	223619	1	0	0	0	0	0	0	0	0	0.925163	0.769948	0.663108	0	0	0	0	0	0	0
318.026	C14H9NO8	366.182	240406	1	0	0	0	0	0	1.22142	1.50087	1.43996	5.25318	5.45869	5.36484	1.23414	1.29883	0.472139	0.441116	0.411025	0	0
318.041	C18H9NO5	283.149	215385	1	0	0	0	0	0	0.494684	0.533706	0.644286	3.73519	4.01215	4.14834	0.873991	0.952373	0	0	0	0	0
318.044	C15H13NO5S	86.5657	210936	1	0.0186387	0.0202105	0.0155722	0	0	0	0	0	1.26379	1.30114	1.00018	0	0	0	0	0	0	0
318.062	C15H13NO7	1460.05	253041	1	0.376976	0.48604	0.422527	0.192198	0.15621	5.48346	5.8849	5.72751	21.2455	21.2966	21.3909	10.0803	9.81046	2.87234	2.94455	2.8009	0.39902	0.50875
318.073	C14H13N3O6	386.777	212120	1	0	0	0	0.0739222	0.0682538	0	0	0	3.80544	5.042	4.39737	0	0	0	0	0	0.0919098	0.062581
318.077	C19H13NO4	381.396	227790	1	0.0318071	0.0121666	0.0109803	0	0	0.707439	0.789019	0.793317	4.38373	5.11467	5.58774	1.3389	1.53092	0	0	0	0	0
318.098	C16H17NO6	3179.81	250211	1	2.90562	3.12277	2.88349	2.06844	2.11363	3.08599	3.17554	3.28947	17.4324	19.1116	18.8916	10.2953	11.1442	1.69516	1.14516	1.5444	3.03618	2.88748
318.11	C15H17N3O5	544.336	231551	1	0	0	0	0.348349	0.336252	0	0	0	3.11118	2.4682	2.68824	0	0	0	0	0	0.504146	0.480405
318.114	C20H17NO3	95.44	221393	1	0.0164899	0.023902	0.0337054	0	0	0.140637	0.0913461	0.112739	0.743683	0.635469	0.574271	0.117656	0.211388	0	0	0	0	0
318.135	C17H21NO5	2823.65	248196	1	2.43353	2.61083	2.40133	1.81807	1.83151	0.288187	0.230147	0.260874	5.58854	5.93053	6.49822	2.69677	2.75088	0.116625	0	0.140724	2.30316	2.25291
318.146	C16H21N3O4	88.8524	209004	1	0	0	0	0.0353832	0.0406554	0	0	0	0.214107	0.165473	0	0	0	0	0	0	0.0860442	0.091695
318.171	C18H25NO4	586.638	244946	1	0.311095	0.302783	0.306428	0.181157	0.17743	0	0	0	0.300088	0.29293	0.228481	0.0729673	0.0670761	0	0	0	0.116885	0.0866239
318.992	C14H8O7S	57.2239	223246	1	0	0	0	0	0	0.0422907	0	0.0425188	0.456536	0.540808	0.228908	0.0636306	0.0727373	0	0	0	0	0
319.007	C18H8O4S	28.9647	194369	1	0	0	0	0	0	0.0555877	0	0.0425225	0.44203	0.278559	0.302149	0.106682	0.194267	0	0.0779901	0.0749949	0	0
319.01	C14H8O9	1635.7	244948	1	0	0	0	0	0	6.2254	6.76046	6.77085	4.7528	5.15662	5.7436	3.55669	3.33261	12.5353	12.9371	12.6161	0	0
319.013	C11H12O9S	71.4317	217832	1	0	0	0	0	0	0.244293	0.182687	0.265867	0.615878	0.362124	0.581844	0	0	0.172092	0.16453	0.122152	0	0
319.025	C18H8O6	1224.25	243699	1	0	0	0	0	0	4.95852	5.23078	5.70132	7.31706	7.47333	8.45068	6.00022	6.60456	4.88019	4.43893	4.20799	0	0
319.028	C15H12O6S	342.748	230542	1	0	0	0	0	0	0.891592	0.727804	1.03792	1.71955	2.05571	2.15154	0.63196	1.03641	0.685341	0.725668	0.788652	0	0
319.043	C19H12O3S	43.1214	183635	1	0	0	0	0.0247299	0.0284143	0	0	0	0.428558	0.411561	0.333305	0.252551	0.319619	0	0	0	0	0
319.046	C15H12O8	8210.92	249044	1	0.811864	0.887371	0.842375	0.152252	0.124759	36.7314	37.1944	38.2382	39.5817	39.5911	39.6623	30.4937	31.7445	58.3144	56.3541	54.9065	0.192911	0.158495
319.049	C12H16O8S	1029.94	240503	1	0.0748483	0.0790915	0.0765659	0.248982	0.237076	1.68003	1.39023	1.65559	4.91977	4.34829	4.85408	1.80036	1.50079	0.618074	0.48446	0.423079	0.141033	0.153067
319.057	C14H12N2O7	979.184	240600	1	0.0785443	0.0902005	0.074425	0.00968773	0.0135735	1.7082	2.09821	1.6923	13.9039	14.4998	14.3458	3.86302	3.77091	0.706865	0.504198	0.556615	0.172186	0.104112
319.061	C19H12O5	2557.75	245931	1	0.101718	0.0686417	0.0782565	0	0	11.641	11.7392	11.9114	17.7435	17.8816	17.9623	13.5012	13.3634	8.73073	7.63042	7.50957	0	0
319.065	C16H16O5S	451.34	219412	1	0.228563	0.182083	0.215721	0	0	0.781197	0.806151	0.844931	2.28066	2.34077	2.81528	1.12311	1.23031	0.707248	0.639149	0.485904	0	0
319.082	C16H16O7	11362.2	250093	1	11.3482	12.8816	11.4461	7.20758	7.5685	39.7966	41.9963	42.0089	53.5265	55.8072	54.7762	54.5835	54.1429	52.1722	51.4113	51.2154	5.97481	5.99559
319.086	C13H20O7S	4717.37	257349	1	0.64626	0.805249	0.656784	0.820676	0.839733	1.40831	1.05942	1.10404	7.66676	7.60162	7.52526	2.8936	2.88565	1.31216	1.23709	1.10933	0.956929	0.924076
319.094	C15H16N2O6	2472.03	248324	1	1.91096	2.15213	1.96769	1.41623	1.39846	1.77112	2.02393	2.10368	20.5596	20.9133	20.1152	8.71866	8.48975	0.648185	0.754176	0.694749	2.95799	3.00156
319.098	C20H16O4	1425.55	246565	1	0.367496	0.464666	0.363314	0	0	5.98181	6.24284	6.63877	7.27181	8.02813	7.83965	6.99446	6.7469	2.4528	2.63017	2.18666	0.0434241	0.0310221
319.103	C13H20O9	445.451	242046	1	0	0	0	0.0442636	0.0525285	0.270376	0.191896	0.220869	0	0	0	0.340767	0.588154	0.951522	1.21742	0.944105	0.0762119	0.0908734
319.105	C14H16N4O5	51.6893	154810	1	0	0.0148492	0.0176342	0	0	0	0	0	0	0	0	0	0	0	0	0	0	0
319.119	C17H20O6	40164.8	250727	1	36.021	38.34	35.8328	25.1312	26.7544	33.0095	33.5963	34.7465	58.0684	60.7387	59.8397	52.4023	55.712	36.9196	35.2481	34.7614	17.076	16.5499
319.122	C14H24O6S	784.644	264866	1	0.0414286	0.0421694	0.0399421	0	0	0	0.059607	0.0435358	0.824855	0.988997	0.863049	0.232162	0.243712	0.214142	0.106481	0.176144	0.0277991	0.0136124
319.13	C16H20N2O5	2541.19	245571	1	1.53652	1.75247	1.56292	1.58181	1.69273	0.0693309	0.141806	0.114694	4.35815	4.18722	3.95043	2.1328	2.63644	0	0.135652	0.0747118	3.11181	3.09157
319.134	C21H20O3	363.527	247028	1	0.499343	0.48451	0.45382	0	0	0.93379	1.03349	1.01104	1.47759	1.23188	1.28445	1.05269	1.05814	0.183336	0.0815933	0.115838	0.0265085	0.0262331
319.14	C14H24O8	57.352	209626	1	0	0	0	0.0197196	0.038203	0	0	0	0	0	0	0	0	0	0.121791	0.0714832	0	0
319.155	C18H24O5	18072.9	248265	1	23.2223	25.0087	23.1582	11.3645	11.4935	15.6519	15.7691	15.8446	40.6549	40.5949	38.749	29.3953	30.9634	19.4583	18.2105	18.1131	10.0469	9.62278
319.166	C17H24N2O4	116.305	241894	1	0.0220389	0.0287728	0.0406585	0.0451701	0.0501243	0	0	0	0	0	0	0	0	0	0	0	0.0760918	0.077808
319.17	C22H24O2	129.239	240592	1	0.144681	0.158569	0.146947	0	0	0.0684146	0.0488141	0.0732231	0	0.245166	0.146003	0.108315	0.0658963	0	0	0	0	0
319.191	C19H28O4	3072.36	248578	1	4.05725	4.2838	3.93685	1.1215	1.15438	1.12503	1.12198	1.46092	9.05067	8.93918	9.50887	6.22676	6.42302	3.41734	3.09162	2.9453	1.43488	1.29913
319.228	C20H32O3	56.9098	246671	1	0	0.0388957	0.0297459	0	0	0	0	0	0	0	0	0	0	0	0	0	0	0
320.005	C13H7NO9	24.1266	207372	1	0	0	0	0	0	0.104974	0.0830235	0.0851696	0.254594	0.159472	0.251876	0	0	0	0	0	0	0
320.017	C21H7NOS	140.842	208457	1	0	0	0	0	0	0.359097	0.339031	0.53217	0.252317	0.179159	0.18256	0.341258	0.535531	1.00419	1.11394	0.715678	0	0
320.02	C17H7NO6	90.4087	197194	1	0	0	0	0	0	0.180464	0.11596	0.104687	1.02888	1.19852	1.32455	0.222038	0.229893	0	0	0	0	0
320.024	C14H11NO6S	62.9668	219840	1	0	0	0	0	0	0	0	0	0.803261	0.94643	0.873223	0.305679	0.317494	0	0	0	0	0
320.041	C14H11NO8	807.536	245115	1	0.0152737	0.0298378	0.0148429	0	0	3.47269	3.447	3.64038	11.2886	10.6696	10.4075	3.34031	3.62583	1.5638	1.25714	1.42024	0.0186773	0.0151981
320.056	C18H11NO5	685.528	239595	1	0	0	0	0	0	1.80517	1.39741	1.35701	9.87224	9.46554	10.0435	2.88812	2.6814	0.148844	0.161081	0.149054	0	0
320.078	C15H15NO7	2417.23	250254	1	1.87104	2.0482	1.96261	1.54801	1.61015	6.02613	5.96163	6.10141	22.7273	22.8664	22.7193	12.9029	13.242	3.40359	3.55113	3.32354	2.25922	2.27333
320.089	C14H15N3O6	506.01	243745	1	0	0	0	0.267345	0.20837	0	0	0	3.98799	4.6168	4.48058	0	0	0	0	0	0.198365	0.172964
320.093	C19H15NO4	307.94	234680	1	0.0589088	0.0311483	0.0376138	0	0	0.640833	0.663552	0.545358	4.41697	4.42635	4.51155	0.947501	1.29049	0	0	0	0.0206844	0.0161168
320.114	C16H19NO6	7075.98	248843	1	4.29489	4.4519	4.27528	4.60286	4.63058	1.7068	1.66109	1.89478	15.3701	14.8779	15.3698	9.00064	9.36282	1.12597	1.12083	1.11429	5.07408	5.07282
320.125	C15H19N3O5	703.08	220628	1	0	0	0	0.415611	0.468332	0	0	0	0.836932	0.741452	0.729209	0	0	0	0	0	0.770339	0.705
320.129	C20H19NO3	72.0759	231243	1	0.0320652	0.0392056	0.0157075	0	0	0	0	0	0.362319	0.453458	0.28281	0.0820853	0.06953	0	0	0	0	0
320.15	C17H23NO5	2571.46	248365	1	1.81997	1.9469	1.89631	1.66514	1.71289	0.0437628	0	0.0895575	2.45573	2.24122	2.37335	0.942827	0.855522	0	0	0	1.59847	1.5176
320.162	C16H23N3O4	24.0728	182962	1	0	0	0	0.0119304	0.00906691	0	0	0	0	0	0	0	0	0	0	0	0.0141093	0.0228101
320.187	C18H27NO4	138.287	239537	1	0.0499588	0.0366992	0.0293707	0.0266664	0.0314931	0	0	0	0	0	0	0	0	0	0	0	0	0
321.002	C10H11O10P	22.6233	214840	1	0	0	0	0	0	0	0	0	0	0	0	0.158614	0.167686	0	0	0	0	0
321.004	C17H6O7	254.551	233580	1	0	0	0	0	0	1.19956	1.14321	1.18545	1.22201	0.947605	1.03566	1.48509	1.21589	1.27285	1.39413	1.30492	0	0
321.007	C14H10O7S	208.134	234333	1	0	0	0	0	0	0.20961	0.224222	0.200513	1.2254	0.854223	0.805417	0.163646	0.293587	0	0.0887764	0.0776765	0	0
321.023	C18H10O4S	39.5564	223505	1	0	0	0	0	0	0.120466	0.0845158	0.148091	0.567508	0.50107	0.379513	0.245565	0.293195	0	0	0	0	0
321.025	C14H10O9	4260.63	244977	1	0	0	0	0	0	19.2655	19.795	19.8417	14.9147	15.3043	14.2865	10.8381	10.6916	31.6093	30.8012	31.1069	0	0
321.028	C11H14O9S	115.74	220644	1	0	0	0	0	0	0.405212	0.543358	0.436166	0.727846	1.04132	1.23381	0.368904	0.311543	0.119641	0.218137	0.197973	0	0
321.036	C13H10N2O8	192.047	232502	1	0	0	0	0	0	0.440857	0.476141	0.609969	2.8309	2.49141	2.81364	0.626981	0.685801	0.315775	0.185525	0.27308	0	0
321.04	C18H10O6	2899.42	246627	1	0.0273889	0.0227874	0.0173163	0	0	12.9593	12.7403	13.5026	20.5657	21.2025	21.5216	13.4452	15.4222	12.29	11.1108	11.0913	0	0
321.044	C15H14O6S	590.138	233389	1	0.112178	0.0930177	0.0627766	0	0	1.17639	0.996857	1.06524	2.43955	2.33526	2.65808	0.995676	0.862518	1.02874	0.76321	0.815695	0	0
321.059	C19H14O3S	179.498	164944	1	0	0	0	0.116762	0.11171	0	0	0	0.365455	0.338188	0.237638	0	0	0	0	0	0	0
321.062	C15H14O8	11076.4	249441	1	4.12274	4.69179	4.24386	2.69952	2.85654	49.5927	51.6535	51.5827	49.6419	51.5893	49.2137	47.2547	45.3292	72.9589	74.5154	70.9337	2.34328	2.24924
321.065	C12H18O8S	1121.57	246995	1	0.11673	0.120472	0.12994	0.271483	0.287783	1.05793	1.00214	1.02178	6.51023	6.66433	6.18497	1.80787	1.69587	0.728646	0.529042	0.483434	0.144771	0.12107
321.073	C14H14N2O7	1351.11	250307	1	0.625556	0.646141	0.564122	0.369323	0.409911	2.02748	2.48435	2.66217	16.7635	16.9988	16.7981	5.7723	6.14622	0.819893	0.889844	0.71531	0.602139	0.712164
321.077	C19H14O5	2708.02	248353	1	0.428469	0.457179	0.498762	0	0	12.1704	12.5397	12.6112	19.2262	19.0209	18.4045	14.0637	15.0413	9.05888	8.62347	8.15805	0.047641	0.0462202
321.08	C16H18O5S	933.768	211504	1	0.777804	0.671831	0.753691	0	0	0.326842	0.348788	0.497689	2.47863	2.58041	2.46088	0.882596	0.984911	0.236997	0.281882	0.253866	0	0
321.083	C12H18O10	15.3035	95169.1	1	0	0	0	0	0	0.0754271	0.0564335	0.0692807	0	0	0	0	0	0.0799785	0.0848171	0.0731811	0	0
321.088	C18H14N2O4	283.964	193205	1	0	0.0318967	0.0270619	0	0	0.291377	0.146975	0.207506	3.3071	4.26815	3.99649	0.621503	0.721703	0	0	0	0.025619	0.0219324
321.098	C16H18O7	57562.8	250567	1	34.8506	37.649	34.8405	36.95	38.3434	51.4025	52.7544	55.5005	70.5824	76.5852	74.5288	69.8112	75.204	62.0677	61.7525	59.1482	17.5667	17.3157
321.101	C13H22O7S	1028.74	243962	1	0.0265968	0.0341832	0.0118801	0	0	0.0931568	0.0506021	0.092535	2.54521	2.77489	1.84841	0.492913	0.421698	0.420513	0.545317	0.39121	0.0883368	0.0760551
321.109	C15H18N2O6	5067.57	248321	1	2.82107	3.09268	2.89334	3.22337	3.37558	1.00074	1.01933	1.0797	13.869	14.0699	14.2013	7.23928	7.58884	0.560394	0.517832	0.562489	6.82244	6.85895
321.113	C20H18O4	1065.3	255188	1	1.0905	1.05344	1.00919	0	0	5.08425	4.93445	4.96109	6.19253	7.47002	7.01976	5.65571	6.12277	1.69364	1.72138	1.77584	0.1509	0.112759
321.134	C17H22O6	72634.2	250576	1	49.5897	52.5535	49.2257	47.2479	47.4752	36.3022	36.2454	37.8799	73.4991	71.705	71.9528	61.7216	67.4422	44.0241	42.1105	40.3458	24.4043	23.8139
321.146	C16H22N2O5	1667.99	250853	1	0.643472	0.674127	0.682334	1.06685	1.11107	0	0	0	0.551238	0.464171	0.324418	0.180218	0.249863	0	0	0	1.79461	1.75385
321.15	C21H22O3	748.92	250086	1	0.90868	1.04466	0.941727	0	0	0.953328	0.777162	0.988374	1.26665	1.78093	1.61655	0.87556	1.17355	0.212876	0.200756	0.139759	0.0918934	0.0926364
321.171	C18H26O5	10982.4	247510	1	14.2624	14.6314	13.6559	7.14393	7.09075	8.74168	8.40665	8.4144	29.2183	30.0387	29.546	19.2687	21.4384	14.0858	13.0761	13.407	6.42357	6.23571
321.186	C22H26O2	193.396	248160	1	0.24694	0.245	0.201039	0	0	0.0457195	0.139004	0.0897842	0	0	0	0.0857932	0.0648437	0	0	0	0	0
321.207	C19H30O4	828.268	249051	1	1.00437	1.02279	0.899838	0.144437	0.165939	0	0.0453986	0.057983	1.7141	1.2733	0.986239	0.915722	1.04896	0.441752	0.423562	0.551115	0.121619	0.0902155
321.211	C16H34O4S	925.777	248887	1	0	0	0	0	0	0	0	0	0	0	0	0	0	0.37179	0.458595	0.495588	0.170611	0.219409
321.243	C20H34O3	35.89	239478	1	0	0	0	0	0	0	0	0	0	0	0	0	0	0.217101	0.276927	0.279939	0	0
322.003	C13H9NO7S	34.0896	236999	1	0	0	0	0	0	0	0	0	0.52024	0.494795	0.416077	0.113783	0.0661335	0	0	0	0	0
322.02	C13H9NO9	77.7306	215454	1	0	0	0	0	0	0.196275	0.315493	0.263348	0.715254	0.84281	0.813025	0.131054	0.192678	0.0909452	0.104825	0.10909	0	0
322.036	C17H9NO6	485.544	242286	1	0	0	0	0	0	1.10036	1.08139	0.989654	7.40988	6.92506	6.93161	1.70902	1.60602	0.162868	0.128088	0.154246	0	0
322.039	C14H13NO6S	90.4379	235338	1	0.0213319	0.0269411	0.0123783	0	0	0	0	0	0.885875	1.17225	0.771596	0	0	0	0	0	0	0
322.057	C14H13NO8	1311.23	253068	1	0.224119	0.214265	0.269006	0.160059	0.177897	5.52767	6.1558	6.10348	15.3405	15.3141	14.7573	6.78074	6.47376	2.62781	2.95263	2.53885	0.271156	0.29265
322.072	C18H13NO5	684.503	240812	1	0.0314481	0.0580628	0.0346987	0	0	1.68234	1.87698	1.78244	9.92126	10.2885	9.94523	3.47269	3.33757	0.217799	0.120062	0.176875	0.0267658	0.0142702
322.093	C15H17NO7	8007.8	248950	1	4.11238	4.30221	4.15802	5.209	5.22558	5.29254	4.92367	5.15322	21.9188	22.1097	21.6647	13.437	13.9431	3.55966	3.36235	3.11641	6.66142	6.86189
322.105	C14H17N3O6	631.111	236578	1	0	0	0	0.410532	0.403116	0	0	0	1.81573	2.24604	2.19309	0	0	0	0	0	0.330406	0.381061
322.109	C19H17NO4	295.136	244339	1	0.150261	0.137093	0.153297	0.00573424	0.00575767	0.40938	0.253015	0.307258	1.997	3.10956	2.63816	0.74362	0.697865	0	0	0	0.0244598	0.0368036
322.13	C16H21NO6	8622.94	249093	1	3.81425	4.46318	3.94187	5.32091	5.74387	0.525154	0.409979	0.387931	8.33857	8.14182	8.75157	5.37819	5.87607	0.364802	0.369033	0.454958	5.56121	5.40807
322.141	C15H21N3O5	263.444	219208	1	0	0	0	0.171368	0.15745	0	0	0	0	0	0	0	0	0	0	0	0.237712	0.26161
322.145	C20H21NO3	139.17	240480	1	0.0667166	0.0716721	0.0697224	0	0	0	0	0	0.281319	0.327485	0.132879	0	0	0	0	0	0	0
322.166	C17H25NO5	1247.47	249391	1	0.598845	0.619251	0.610996	0.811465	0.828935	0	0	0	0.30021	0.35646	0.420486	0.123173	0.172081	0	0	0	0.383154	0.288395
323.005	C13H8O10	833.742	229838	1	0	0	0	0	0	2.5528	2.80887	2.60608	0.748984	0.955742	0.76486	0.490184	0.688648	6.97838	6.48844	6.44961	0	0
323.02	C17H8O7	1985.19	248848	1	0	0	0	0	0	8.99852	8.56355	9.24502	12.8031	11.6904	12.902	8.12048	8.54191	9.45874	8.85774	8.9793	0	0
323.023	C14H12O7S	579.953	235433	1	0	0.0179124	0.0108496	0	0	0.57619	0.562776	0.481743	1.72519	2.34807	2.0079	0.650622	0.604098	0.367058	0.361605	0.349868	0	0
323.038	C18H12O4S	63.022	204039	1	0	0	0	0	0	0.170504	0.172738	0.19775	0.728282	0.511862	0.583793	0.421583	0.467124	0.105304	0.100209	0	0	0
323.041	C14H12O9	8987.97	247826	1	0.429115	0.471413	0.386171	0.230375	0.207466	40.8325	41.4819	41.8569	25.4975	26.2581	26.1863	21.4577	22.0727	59.266	57.0226	56.086	0.0919171	0.0772766
323.044	C11H16O9S	105.351	211158	1	0	0	0	0	0	0.306167	0.16372	0.265711	1.57903	1.5835	1.51918	0.645086	0.651314	0.235644	0.126052	0.128731	0	0
323.052	C13H12N2O8	353.369	234393	1	0	0	0	0.00641487	0.00784633	1.09603	1.24636	1.14565	4.28033	4.27146	5.17712	1.28843	1.21726	0.451501	0.3738	0.352634	0.0130231	0.0132234
323.056	C18H12O6	3895.54	247572	1	0.251146	0.222079	0.265773	0	0	18.344	18.1864	18.1415	26.5932	27.2715	26.4368	19.7664	20.9601	16.8582	15.3303	15.848	0.0277458	0.0243904
323.06	C15H16O6S	1066.44	223970	1	0.474012	0.484159	0.457977	0.0775286	0.0647127	0.977855	0.824412	0.951746	3.9236	3.77946	3.53356	1.10574	1.47566	0.599519	0.552225	0.590468	0.0543881	0.0367087
323.071	C22H12O3	121.55	191085	1	0.0162478	0.0118835	0.0247723	0.0121449	0.0219046	0.455718	0.5254	0.52994	1.61795	1.82697	1.71401	0.621017	0.70596	0.420887	0.394664	0.319319	0	0
323.077	C15H16O8	35914.3	248708	1	17.1023	19.0329	17.5583	22.9259	23.923	72.1234	70.7499	70.6192	64.71	66.946	66.0733	64.3775	65.264	83.2429	82.1254	82.4681	9.11977	9.33854
323.081	C12H20O8S	489.868	216249	1	0	0	0	0	0	0.078855	0.09207	0	4.23544	4.54675	3.8831	0.439312	0.36347	0.22451	0.192893	0.189779	0.0216419	0.0288492
323.088	C14H16N2O7	2910.94	250197	1	1.69026	1.95139	1.73379	1.89142	1.93902	1.85902	2.02942	2.07161	13.2728	14.3641	13.4387	6.402	6.90737	0.965659	0.880139	0.846101	2.76664	2.81214
323.09	C12H21O8P	145.331	76206.3	1	0	0	0	0	0	0	0	0	0	0	0	0	0	0.108328	0	0.116246	0	0
323.093	C19H16O5	2389.08	254602	1	1.43023	1.55605	1.40921	0	0	11.5618	11.2159	11.0222	17.691	17.0951	17.3589	14.3618	14.7445	8.02004	7.513	7.14496	0.299552	0.298218
323.108	C23H16O2	43.1619	221523	1	0	0	0	0	0	0.0830072	0.045659	0.0829764	0.239463	0.409086	0.607496	0.161854	0.0981708	0.0956318	0.143711	0.0921922	0.0308994	0.0147438
323.114	C16H20O7	141211	251187	1	61.2277	68.6305	60.6551	86.8885	94.0625	70.2219	73.394	72.4312	94.7046	98.9918	97.0668	98.2579	97.066	79.8291	80.4329	79.2494	32.9126	32.4349
323.125	C15H20N2O6	5079.18	248061	1	2.09485	2.39289	2.26379	3.19478	3.38332	0.315951	0.196914	0.179002	4.13113	4.70206	4.35093	3.21522	3.20003	0.24209	0.112642	0.167812	6.37347	6.35337
323.129	C20H20O4	1713.46	252390	1	2.19943	2.35206	2.19559	0	0	5.00012	4.779	5.17383	6.87279	8.10842	7.51639	5.81203	6.30157	1.7452	1.6151	1.45817	0.547055	0.572008
323.15	C17H24O6	58768.6	248519	1	34.5559	38.8452	34.1722	37.3669	39.1466	22.7366	23.7452	23.104	62.1103	64.8892	62.8525	53.5712	53.8893	33.5861	32.6781	32.5924	18.3149	17.8281
323.161	C16H24N2O5	220.321	243594	1	0.0728822	0.0778618	0.0572117	0.118334	0.146759	0	0	0	0	0	0	0	0	0	0	0	0.125897	0.196545
323.165	C21H24O3	1238.65	248511	1	1.63155	1.71347	1.4658	0.0181202	0.0279533	1.28044	1.1394	1.21865	1.9371	2.04815	1.86039	1.70595	1.9452	0.283295	0.390839	0.322699	0.273063	0.250805
323.169	C18H28O3S	2385.98	240157	1	0.179306	0.176012	0.189398	0.0198487	0.0188002	0	0	0	0.310313	0.190538	0.266803	0.112572	0.158595	0.466563	0.292734	0.522229	0	0
323.186	C18H28O5	3240.31	248239	1	4.03124	4.38423	3.98577	2.02315	2.15842	0.817274	0.981718	0.984893	9.82134	10.4313	10.3668	6.95989	7.66787	5.28669	4.82277	4.04764	2.17664	2.00712
323.202	C22H28O2	208.651	246096	1	0.277902	0.276895	0.211544	0	0	0.0790811	0.0531043	0.0972632	0	0	0	0.127547	0.130921	0	0	0	0.024058	0.015635
323.223	C19H32O4	56.1813	246682	1	0.0123246	0.0221136	0.0167267	0	0	0	0	0	0	0	0	0	0	0	0	0	0	0
324.015	C16H7NO7	128.671	229661	1	0	0	0	0	0	0.246778	0.13955	0.149151	1.3825	1.934	1.2733	0.341322	0.269717	0	0	0	0	0
324.018	C13H11NO7S	67.1514	210319	1	0	0	0	0	0	0	0	0	1.0248	0.771121	0.876466	0.211602	0.358008	0	0	0	0	0
324.036	C13H11NO9	362.308	238065	1	0	0	0	0	0	1.29515	1.26054	1.23971	1.85627	2.39982	1.8304	0.592418	0.563004	0.424854	0.440407	0.520907	0	0
324.051	C17H11NO6	911.983	244132	1	0.016058	0.0137665	0.0144599	0	0	2.31226	2.65459	2.50957	12.8383	13.7077	13.1765	4.40093	3.99089	0.336141	0.407046	0.446418	0	0
324.055	C14H15NO6S	128.944	218677	1	0.0619404	0.0680245	0.0583852	0.00786902	0.00788264	0	0	0	0.573736	1.02034	1.00925	0	0	0	0	0	0.020599	0.0335742
324.073	C14H15NO8	2866.04	251571	1	1.52029	1.63714	1.60293	1.80208	1.90911	5.90374	6.26054	6.77523	16.912	17.8914	17.8548	9.37869	10.0899	3.93884	3.60898	3.74461	2.24426	2.1639
324.084	C13H15N3O7	137.607	199764	1	0	0	0	0.0227499	0.0274545	0	0	0	1.55062	1.27817	1.62868	0	0	0	0	0	0	0
324.088	C18H15NO5	632.586	246132	1	0.226385	0.26525	0.204922	0	0	1.31227	1.20098	1.35967	9.43181	8.95233	9.26785	3.84604	3.47145	0.178793	0.156608	0.116324	0.0428192	0.0874371
324.109	C15H19NO7	13305.8	248478	1	4.87181	5.57023	4.98847	8.0797	8.86317	2.59401	2.59947	2.69348	14.8669	15.8695	15.6922	10.7439	11.3434	2.0236	2.20398	1.84649	8.98197	9.13442
324.12	C14H19N3O6	335.888	219907	1	0.0852286	0	0.0841476	0.218492	0.209829	0	0	0	0.56283	0.74992	0.551321	0	0	0	0	0	0.20064	0.187725
324.124	C19H19NO4	531.372	245367	1	0.308566	0.350858	0.306853	0.0259354	0.0206507	0.0971148	0.152264	0.147006	2.2436	1.91638	1.82685	0.466006	0.571338	0	0	0	0.0981639	0.0712395
324.145	C16H23NO6	4627.63	247763	1	2.01469	2.12867	2.04358	3.01023	3.07215	0	0	0	2.15968	2.36939	2.16833	1.38336	1.3994	0	0	0	2.79409	2.64995
324.156	C15H23N3O5	73.8544	235677	1	0.0178413	0.0228409	0.0187872	0.0480416	0.0426066	0	0	0	0	0	0	0	0	0	0	0	0.0199795	0.0266127
324.161	C20H23NO3	143.382	244340	1	0.0857113	0.0526148	0.0360484	0.00981548	0.0107097	0	0	0	0	0	0	0	0	0	0	0	0	0
324.182	C17H27NO5	140.42	239611	1	0.0302168	0.0327113	0.0272861	0.0913417	0.0745385	0	0	0	0	0	0	0	0	0	0	0	0	0
324.999	C16H6O8	433.342	240247	1	0	0	0	0	0	1.6859	2.03439	1.92856	1.39546	1.69472	1.25247	0.704838	0.943159	2.20462	1.85349	1.95223	0	0
325.002	C13H10O8S	225.406	233792	1	0	0	0	0	0	0.257005	0.377238	0.294678	0.719924	0.979157	1.02881	0.0867183	0.15088	0.126186	0.08836	0.0882947	0	0
325.02	C13H10O10	2622.41	242383	1	0	0	0	0	0	11.8803	12.2197	12.2125	4.05724	3.42026	3.6185	3.78202	3.37783	19.175	18.6797	18.043	0	0
325.035	C17H10O7	3841.49	246435	1	0.0402402	0.0373041	0.0402141	0	0	16.7921	16.9907	17.8898	25.0018	25.4035	25.5018	16.6517	16.7779	18.9044	18.903	18.3884	0	0
325.039	C14H14O7S	1549.72	234805	1	0.152879	0.178055	0.169381	0.0281432	0.0213354	0.813108	0.941973	0.906333	3.8651	3.84214	4.27648	0.928832	1.22492	0.691274	0.633873	0.458248	0.0570196	0.0386825
325.051	C21H10O4	240.387	213172	1	0	0	0	0	0	0.896855	1.02538	1.11948	1.8817	2.07889	2.77052	1.22973	1.28558	0.422817	0.579604	0.605531	0	0
325.057	C14H14O9	14780	246639	1	3.39906	3.76042	3.53397	4.33024	4.28029	68.6201	67.8523	68.8302	40.1407	39.4634	39.1445	32.4051	32.315	72.4903	71.166	70.157	1.75957	1.78843
325.068	C13H14N2O8	380.854	243233	1	0.0655559	0.0634134	0.0413962	0.0196043	0.0133404	1.41792	1.33377	1.37338	4.76435	5.48573	5.3743	2.07889	1.77682	0.569009	0.482969	0.550705	0.0739008	0.0786061
325.072	C18H14O6	4162.73	248946	1	1.12398	1.36695	1.1717	0	0	18.9258	19.2567	19.3858	29.8003	29.7143	30.7781	23.5098	25.2759	18.422	18.2667	17.6472	0.273668	0.293683
325.075	C15H18O6S	2264.82	227941	1	1.26444	1.26963	1.13757	0.111198	0.134083	0.835326	0.998041	1.0178	6.64251	7.50905	7.52956	1.8429	1.49804	0.526922	0.338719	0.415857	0.474413	0.332105
325.087	C22H14O3	215.868	218324	1	0.0456216	0.0257134	0.0225688	0	0	1.07132	0.922421	0.858037	1.48858	1.70751	1.90203	1.13466	1.05499	0.345562	0.447719	0.205235	0.0574547	0.0327089
325.093	C15H18O8	113368	250278	1	40.356	44.2951	40.8907	73.7451	75.1639	100	100	100	90.3265	91.4861	92.5402	91.556	92.952	100	98.0079	98.8054	22.9514	23.119
325.104	C14H18N2O7	3496.79	247979	1	1.64527	1.71004	1.66717	2.14984	2.32927	0.660982	0.554434	0.708519	6.66383	7.17982	6.97528	3.59191	3.97851	0.340311	0.317392	0.503994	3.3111	3.14713
325.108	C19H18O5	2514.23	251380	1	3.29751	3.40448	3.22168	0.0174662	0.0170677	9.77746	10.3728	10.8871	17.8411	19.2955	18.3368	14.2137	15.2504	8.01635	7.25096	7.31395	1.41826	1.3897
325.129	C16H22O7	133442	249077	1	52.3222	56.4635	51.8662	86.8027	86.2624	51.0851	49.4765	49.7089	87.9555	91.2605	87.7517	88.1805	90.0675	75.9207	74.0898	76.0727	31.8946	31.8184
325.14	C15H22N2O6	1580.69	243981	1	0.482917	0.446351	0.449046	0.797503	0.731431	0	0	0	0.304988	0.299484	0.453773	0.336057	0.343931	0	0	0	2.27827	2.17671
325.145	C20H22O4	3003.44	249959	1	3.60563	4.07601	3.65268	0.0277604	0.0223176	5.28997	5.45799	5.64106	9.05602	9.30794	9.31471	6.90552	8.13642	3.03722	3.24865	2.88347	1.54006	1.6109
325.166	C17H26O6	18685.2	245205	1	10.2154	10.9838	10.1245	12.1545	12.3646	5.89663	6.44145	5.87154	25.0992	26.8316	25.9476	20.5944	21.8485	14.9031	14.6968	14.7598	6.69525	6.72887
325.181	C21H26O3	1425.52	260884	1	1.76316	1.90641	1.82663	0.125671	0.108012	1.11169	0.980334	1.19169	2.12872	2.14541	1.89431	1.78365	2.06887	0.506177	0.517398	0.420474	0.422585	0.418428
325.202	C18H30O5	363.873	246747	1	0.22369	0.214777	0.237472	0.236544	0.213136	0	0	0	0.272596	0.307297	0	0.209393	0.216109	0.372297	0.546914	0.37112	0.0530495	0.0528883
326.031	C16H9NO7	518.416	240475	1	0	0	0	0	0	1.11432	1.17266	1.26964	6.95303	7.34476	7.59518	1.25559	1.15004	0.191923	0.420336	0.163381	0	0
326.034	C13H13NO7S	105.112	208713	1	0	0	0	0	0	0	0	0	0.722186	0.992488	0.611867	0	0	0	0	0	0	0
326.052	C13H13NO9	731.26	247595	1	0.0297909	0.0423733	0.0147418	0.025472	0.0172384	3.20057	3.14741	3.40547	3.33081	3.77439	3.28544	1.07023	1.35341	0.89608	0.929442	0.983172	0.0198729	0.0262419
326.067	C17H13NO6	1037.81	247740	1	0.129717	0.109605	0.0927255	0	0	3.13208	3.06227	3.1162	15.1131	15.5989	14.8855	6.58522	6.28337	0.824907	0.588048	0.655729	0.0580743	0.073887
326.07	C14H17NO6S	124.957	205531	1	0.0954473	0.0936151	0.11342	0.0629456	0.083236	0	0	0	0.740666	0.606849	0.920204	0	0	0	0	0	0.0759412	0.0803801
326.088	C14H17NO8	5584.63	249678	1	2.29902	2.54214	2.40748	3.63275	3.66325	4.39471	4.88861	4.61579	13.6163	13.609	12.9205	8.97724	9.23816	3.13253	2.80118	2.89668	3.49782	3.67221
326.099	C13H17N3O7	96.2157	202381	1	0	0	0	0	0	0.0686808	0	0.0475868	0.888166	0.751269	0.795254	0.0912651	0.144815	0	0	0	0.0374304	0.0356279
326.103	C18H17NO5	1009.09	248641	1	0.744795	0.84322	0.734835	0.0978147	0.0995087	0.82369	0.933384	0.776137	8.04527	8.31046	7.8274	3.05514	3.54012	0.0783297	0.0785217	0.11752	0.262625	0.279124
326.125	C15H21NO7	7967.44	247703	1	2.88596	3.29351	2.99294	4.82584	5.30723	0.310397	0.243737	0.296969	5.27921	5.76581	6.13817	3.87732	4.51258	0.282552	0.363712	0.276771	5.39449	5.32441
326.136	C14H21N3O6	87.3846	224105	1	0.026041	0.0302258	0.016007	0.0568429	0.0542165	0	0	0	0.142439	0.17139	0.161868	0	0	0	0	0	0.0314537	0.0284812
326.14	C19H21NO4	864.087	245785	1	0.517167	0.560003	0.519228	0.0738815	0.0796582	0.0468149	0	0.051476	1.04849	1.13004	1.41975	0.391031	0.420001	0	0	0	0.182349	0.159659
326.161	C16H25NO6	1082.35	243131	1	0.183264	0.191918	0.184078	0.654289	0.72097	0	0	0	0	0.126372	0.228492	0	0	0	0	0	0.188929	0.156815
326.176	C20H25NO3	160.019	244143	1	0.050132	0.0515569	0.0546311	0	0	0	0	0	0	0	0	0	0	0	0	0	0	0
326.982	C12H8O9S	29.0649	228657	1	0	0	0	0	0	0.0548725	0	0.0504412	0.235102	0.189774	0.287294	0	0	0	0	0	0	0
327.012	C20H8O3S	38.896	185615	1	0	0	0	0	0	0	0	0	0.239163	0	0.222381	0.227842	0.2883	0	0	0	0	0
327.015	C16H8O8	1886.3	242319	1	0	0	0	0	0	8.23914	8.63227	8.7845	8.93642	10.1742	9.70389	5.9095	6.171	11.5771	11.1942	10.9136	0	0
327.018	C13H12O8S	991.405	241706	1	0	0	0	0	0	0.610631	0.715082	0.832615	1.95452	2.09516	2.01381	0.471942	0.403644	0.370816	0.276334	0.274909	0	0
327.03	C20H8O5	117.996	220788	1	0	0	0	0	0	0.45739	0.369425	0.539317	1.2378	1.47449	1.45116	0.766612	0.874595	0.402562	0.400983	0.412128	0	0
327.036	C13H12O10	7534.39	242023	1	0.0152443	0.0441947	0.0149742	0.0324382	0.024348	34.0029	34.9715	35.0876	10.4215	10.5421	10.2183	5.14591	4.70428	25.106	25.2424	24.8078	0	0
327.051	C17H12O7	5310.51	245831	1	0.443572	0.464794	0.370883	0.0078029	0.00568556	23.6582	24.7119	24.731	31.7847	34.261	33.348	26.9142	27.9667	28.5793	29.4609	28.0708	0.0503132	0.0809886
327.054	C14H16O7S	6176.61	238843	1	0.88456	0.911778	0.915324	0.319868	0.305069	1.21532	1.14954	1.16081	9.78426	9.31521	9.87942	1.81679	1.82741	0.659271	0.504298	0.679338	0.275266	0.278151
327.064	C14H17O7P	83.6642	120441	1	0.0907481	0.116702	0.0932403	0.0163263	0.020374	0	0	0	0	0	0	0	0	0.183362	0.19235	0	0	0
327.066	C21H12O4	737.715	226936	1	0.0153586	0.0166862	0	0.024031	0.0103471	3.42535	3.3869	3.43553	5.44464	5.30451	5.0342	3.57854	4.00079	1.23605	1.22388	1.19507	0.0384002	0.0405673
327.072	C14H16O9	29118.3	245868	1	9.09761	9.9309	9.12128	18.9412	18.697	80.6973	83.9935	81.6887	50.4098	52.5792	51.6983	44.3662	43.4984	74.4923	73.3213	75.0257	5.27481	5.39694
327.078	C20H12N2O3	48.1778	175896	1	0	0	0	0	0	0.0908098	0	0.102636	0.477087	0.724142	0.424517	0.0863395	0.13121	0	0	0	0	0
327.083	C13H16N2O8	338.874	242134	1	0.0809066	0.103099	0.0745176	0.0939556	0.0597527	0.68888	0.561536	0.723671	2.70304	3.26947	3.15474	0.906433	1.2995	0.196647	0.184663	0.327827	0.105118	0.115636
327.087	C18H16O6	4141.42	246881	1	3.37403	3.90635	3.22319	0.245854	0.277052	18.0847	19.3292	19.2866	29.131	30.4938	29.4824	27.3708	26.6383	19.5189	19.1654	18.9031	1.47889	1.44483
327.091	C15H20O6S	5147.38	238064	1	2.30506	2.44629	2.21591	0.734247	0.731034	1.35727	1.44855	1.63863	13.3804	14.2534	14.5316	2.84177	2.83458	1.01821	0.921605	0.979006	0.924562	0.898703
327.099	C17H16N2O5	989.542	205791	1	0.168802	0.176238	0.207949	0	0	0.460126	0.404589	0.448305	9.81351	9.61049	9.54403	2.85468	3.14225	0	0	0	0.262677	0.263418
327.103	C22H16O3	204.015	233109	1	0.0268234	0	0.0298127	0	0	1.01249	0.849577	0.737406	1.16172	1.11299	1.22333	0.723214	0.787238	0.215659	0.158203	0.278827	0.0272777	0.0356186
327.109	C15H20O8	111374	248199	1	36.3953	40.4358	36.179	72.4479	72.6622	74.6371	76.6013	76.7369	86.0502	89.9736	88.0997	88.9041	87.5172	88.8316	89.4306	88.4377	24.9367	24.3568
327.12	C14H20N2O7	952.059	245290	1	0.378031	0.49316	0.431499	0.354044	0.381032	0.102762	0.06918	0.0766572	1.14615	1.34057	1.20326	0.53113	0.38266	0	0	0	1.10563	1.31104
327.124	C19H20O5	5448.99	247108	1	6.90159	7.60071	6.85075	1.12687	1.08348	11.4567	11.527	12.0576	21.4973	22.9458	21.9118	17.5456	17.1846	9.66654	9.72251	8.92444	3.35048	3.27799
327.127	C16H24O5S	13835.4	235297	1	1.11085	1.25797	1.12293	0.417706	0.460422	0	0	0	1.24666	1.29319	1.01693	0.921354	1.10013	0.110338	0.094316	0	0.450219	0.463964
327.145	C16H24O7	44222.3	245604	1	16.1747	17.5282	16.1172	28.7662	29.2221	13.7357	13.6824	13.9558	39.2455	39.2409	39.2484	37.991	39.01	35.8517	35.0595	35.6201	12.9452	12.6346
327.156	C15H24N2O6	88.6563	227780	1	0.038838	0.0201007	0.0261804	0.0412025	0.0590553	0	0	0	0	0	0	0	0	0	0	0	0.0270702	0.0335247
327.16	C20H24O4	4210.69	247595	1	5.34164	5.78035	5.39548	0.966721	0.911786	5.85392	5.79747	6.04179	10.4275	11.151	11.6268	9.81909	10.1235	4.91466	4.42582	3.84207	2.45364	2.4473
327.164	C17H28O4S	2171.63	229714	1	0.0510507	0.0425488	0.0498083	0	0	0	0	0	0	0	0	0	0	0.324416	0.320046	0.363903	0	0
327.181	C17H28O6	2211.38	224544	1	0.826642	0.920479	0.806698	1.43848	1.41318	0	0	0	1.47253	1.04819	1.20308	1.7045	2.12209	0	0	0	0.481076	0.536575
327.197	C21H28O3	1261.25	246926	1	1.65351	1.7593	1.57037	0.0698355	0.048276	0.677748	0.519311	0.697605	1.30413	1.43926	1.31209	1.46449	1.41433	0.521998	0.367961	0.363788	0.273812	0.268895
328.01	C15H7NO8	67.7617	223947	1	0	0	0	0	0	0.152885	0.156131	0.121341	0.74891	1.0185	0.609593	0.191034	0.129302	0	0	0	0	0
328.029	C16H11NO5S	42.4857	173683	1	0	0	0	0	0	0	0	0	0.611265	0.638586	0.572622	0.153267	0.224079	0	0	0	0	0
328.046	C16H11NO7	983.505	245736	1	0.0153607	0.0277893	0.0160244	0	0	2.87472	3.33116	2.74717	13.3503	14.3534	14.4091	5.07145	4.7957	0.940236	1.01331	0.826113	0.0346189	0.0135589
328.061	C20H11NO4	202.847	200035	1	0	0	0	0	0	0.356311	0.383398	0.377918	2.31436	3.04892	2.61551	0.433798	0.467785	0	0	0	0	0
328.067	C13H15NO9	565.499	248428	1	0.056695	0.0712189	0.0636631	0.198858	0.18477	2.45502	2.65483	2.59988	3.30051	3.12864	3.60895	1.27474	1.17846	0.991594	0.727404	0.935522	0.0945826	0.0611618
328.083	C17H15NO6	1261.54	249218	1	0.722787	0.732196	0.788716	0.143244	0.128384	2.75951	2.90572	2.71651	15.876	15.8767	16.4785	7.24194	8.05395	0.777043	0.901117	0.799623	0.419313	0.378966
328.086	C14H19NO6S	183.231	219849	1	0.144469	0.179446	0.14013	0.110749	0.122053	0	0	0	0.621861	0	0.282384	0.60162	0.421996	0	0	0	0.197208	0.164215
328.094	C16H15N3O5	791.03	220646	1	0.260009	0	0.217534	0.0795253	0.0620698	0	0	0	3.64025	4.08937	3.75829	0	0	0	0	0	0.130728	0.093294
328.098	C21H15NO3	75.503	198560	1	0	0	0	0	0	0.104589	0.105948	0.109203	0.939839	0.749932	0.610919	0.184515	0.208081	0	0	0	0	0
328.104	C14H19NO8	3694.79	249007	1	1.28232	1.34827	1.26553	2.33934	2.46115	0.6062	0.760007	0.715293	4.31671	5.10707	4.99283	3.59922	3.766	0.579544	0.569794	0.630394	2.50147	2.38182
328.119	C18H19NO5	1712.66	247217	1	1.45815	1.54408	1.40291	0.417266	0.469565	0.333426	0.414476	0.433126	6.57572	5.99251	5.78824	2.70606	2.74391	0.998479	0.914822	0.929624	0.958221	0.888038
328.13	C17H19N3O4	2219.83	214327	1	0	0	0	0.0200549	0.0263429	0	0	0	0.364092	0.593942	0.569969	0	0	0	0	0	0.0567437	0.0753734
328.14	C15H23NO7	1810.26	244845	1	0.29762	0.417759	0.370662	1.1152	1.20584	0	0	0	0.39262	0.442142	0.396462	0.232526	0.34665	0	0	0	0.770175	0.72046
328.155	C19H23NO4	976.577	245169	1	0.58977	0.642285	0.549587	0.13553	0.154604	0	0	0	0.732605	0.621531	0.673013	0.165116	0.19024	0	0	0	0.18602	0.192965
328.994	C15H6O9	171.384	234835	1	0	0	0	0	0	0.790054	0.726718	0.798136	0.677802	0.855642	0.500163	0.211312	0.179214	0.911984	0.920027	0.828695	0	0
328.997	C12H10O9S	331.732	239521	1	0	0	0	0	0	0.254891	0.254228	0.348838	0.412727	0.32516	0.408451	0.0830884	0.122087	0	0.109012	0.112936	0	0
329.012	C16H10O6S	74.1115	222139	1	0	0	0	0	0	0.278112	0.228322	0.211009	0.640102	0.708087	0.752139	0.230316	0.18206	0.147245	0.0774815	0.118289	0	0
[truncated: 4,581 more rows]
